# Supplementary material for: The chemical nature of the 2′-substituent in the pentose-sugar dictates the pseudoaromatic character of the nucleobase (pKa) in DNA/RNA
Source: Royal Society of Chemistry journal article supplement (doi:10.1039/b601460g), 2006-01-01
Supplement: b601460g.pdf [file b601460g.pdf]

## Supplementary Information

### **The Chemical Nature of the 2'-substituent in the Pentose-Sugar Dictates the Pseudoaromatic Character of the Nucleobase ( $pK_a$ ) in DNA/RNA**

Subhrangsu Chatterjee, Wimal Pathmasiri, Oleksandr Plashkevych, Dmytro Honcharenko, Oommen P. Varghese, Mohitosh Maiti & Jyoti Chattopadhyaya\*

*Department of Bioorganic Chemistry, Box 581, Biomedical Center,  
Uppsala University, SE-75123 Uppsala, Sweden.*

*Fax: +46-18554495 E-mail: [jyoti@boc.uu.se](mailto:jyoti@boc.uu.se)*

**Figure S1.** The stack plots of the pH-dependent  $^1\text{H}$  NMR chemical shifts of aromatic protons for compounds **2a–2i**, **4a–4j**, **5c–5j** and **6c–6i** at 298 K [only 10-11 pHs points (including two plateaus at two extreme pHs) are shown out of total ~20 – 33 pHs used for the titration plots, see Experimental section for details].

**Figure S2.** Sigmoidal plots of the pH-dependent chemical shifts of aromatic protons for compounds **2a–2i**, **4a–4j**, **5c–5j** and **6c–6i** to calculate the  $pK_a$  of N1/N3/N7 of the nucleobase as well as the protonation  $pK_a$  of N-azetidine as well as N-amine.

**Figure S3.** Hill plot analysis of the pH-dependent chemical shifts of aromatic protons for compounds **2a–2i**, **4a–4j**, **5c–5j** and **6c–6i** to calculate the  $pK_a$  of the corresponding nucleobases as well as nitrogen protonation in amine and in azetidine modified nucleotides.

**Figure S4.** Sigmoidal plots of the pH-dependent  $^{31}\text{P}$  chemical shifts of 3' and 5' phosphorus of the 3',5'-bis-ethyl and 3' mono ethyl phosphates *i.e.*, **5c-j**, **6c-i** to calculate the protonation  $\text{pK}_a$  of N-azetidine as well as N-amine.

**Figure S5.** Hill plot analysis of sigmoidal curves in **Figure S4**.

**Table S1.** Theoretical proton affinities (PA), thermodynamic cycle's components enthalpies Gibbs free energies (gas phase and solvation), and the theoretical  $\text{pK}_a$  values of the nucleobases, 2'-ribo-, 2'-deoxy-, 2'-amino-, 2'-methoxy-, oxetane and azetidine nucleosides as well as the experimental  $\text{pK}_a$  values for the corresponding bis-ethylphosphate nucleotides.

**Table S2.** Frontier orbitals of the 2'-ribo, 2'-deoxy, 2'-amino-, 2'-methoxy-, oxetane- and azetidine- nucleosides.

**Table S3.** Calculated acid-base dipole moments differences ( $\Delta$ dipole moments) of the nucleobases, 2'-deoxy-, 2'-ribo-, 2'-OMe-, oxetane-, and azetidine- nucleosides as well as the experimental  $\text{pK}_a$  values of the respective bis-ethylphosphate nucleotides.

**Figure S1.** The stack plots of the pH-dependent  $^1\text{H}$  NMR chemical shifts of aromatic protons for compounds **2a–2i**, **4a–4j**, **5c–5j** and **6c–6i** at 298 K [only 10–11 pHs points (including two plateaus at two extreme pHs) are shown out of total  $\sim 20 - 33$  pHs used for the titration plots, see Experimental section for details].

**(1) pH dependent  $^1\text{H}$  chemical shift (in  $\text{D}_2\text{O}$ ) of Etp-2'OMe-ApEt (**2a**) at 298 K**

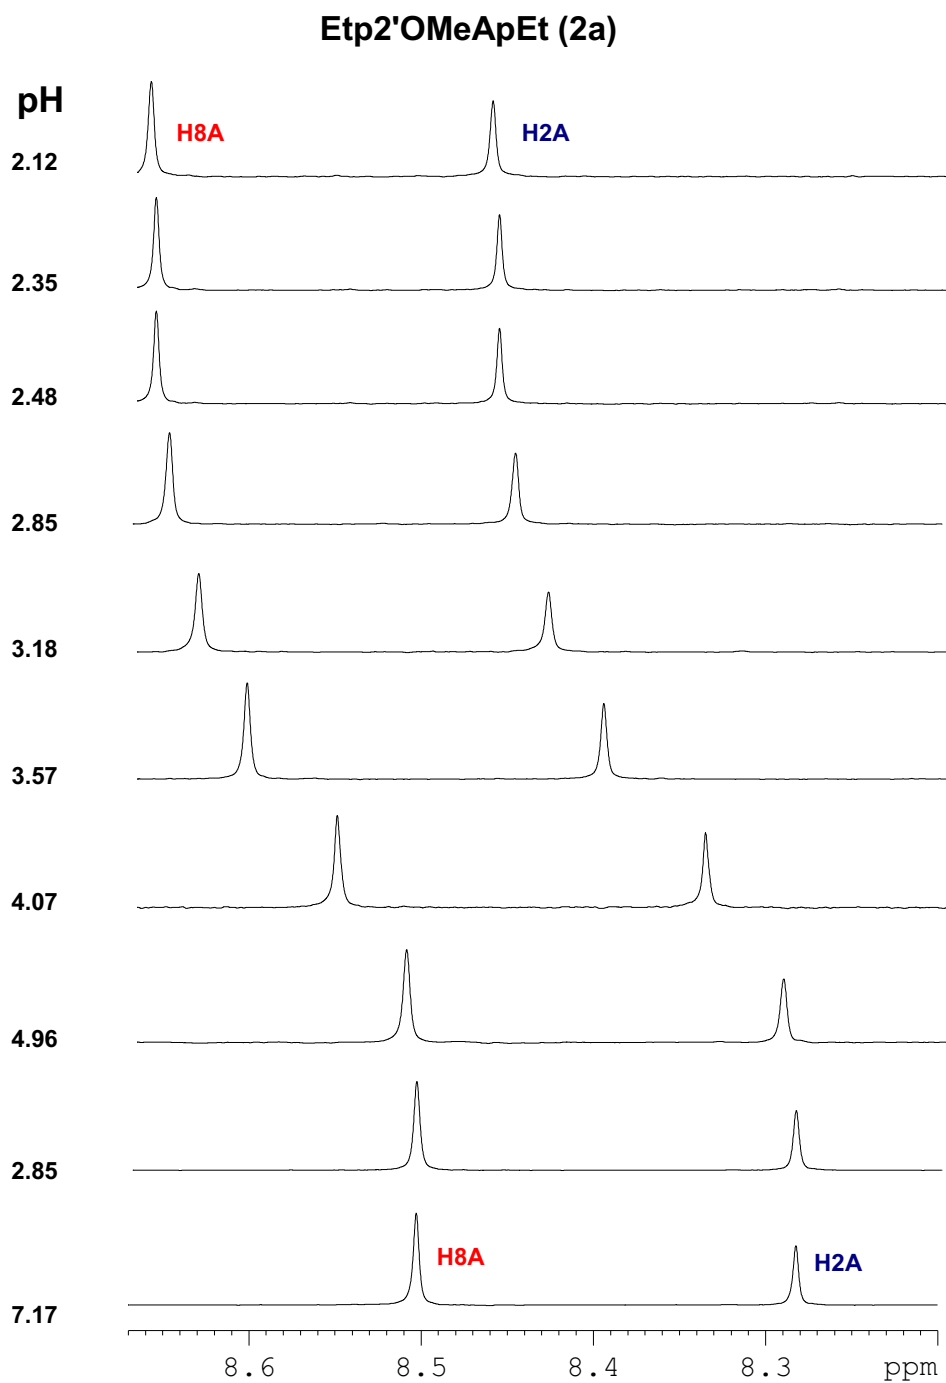

(2) pH dependent  $^1\text{H}$  chemical shift (in  $\text{D}_2\text{O}$ ) of Etp-2'OMe-GpEt (2b) at 298 K

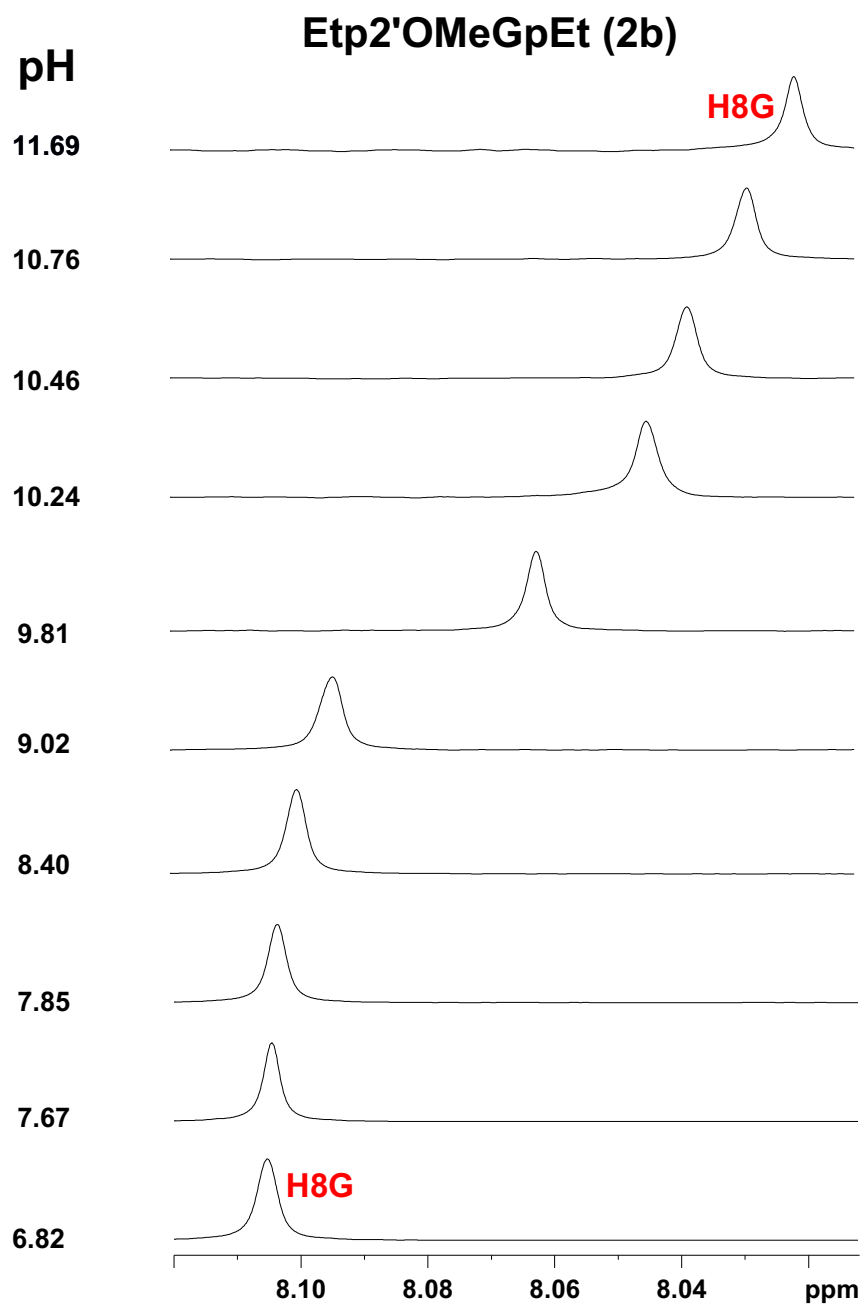

(3) pH dependent  $^1\text{H}$  chemical shift (in  $\text{D}_2\text{O}$ ) of Etp-2'OMe-CpEt (2c) at 298 K

## Etp2'OMeCpEt(2C)

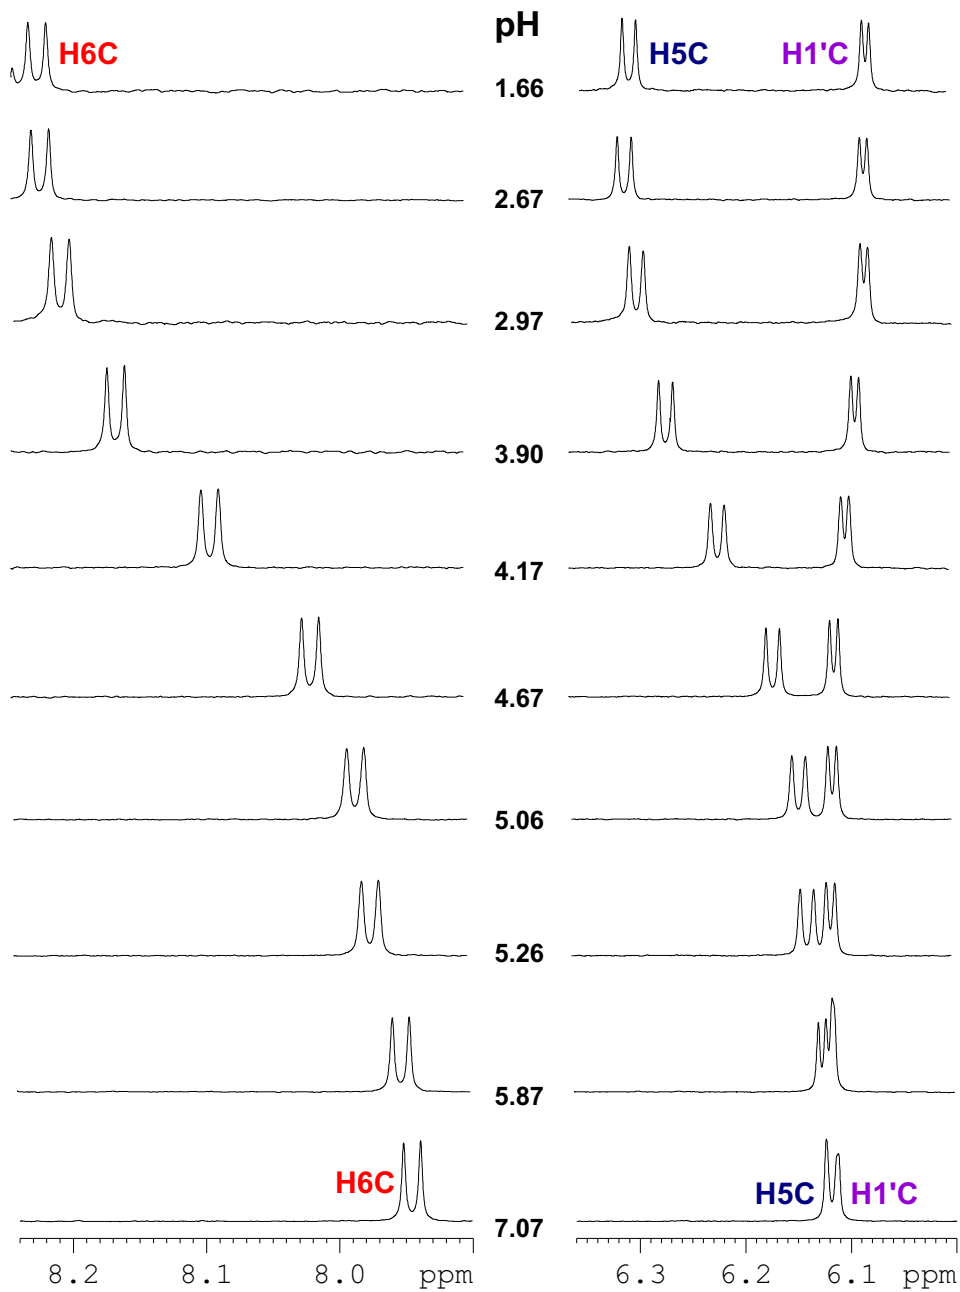

(4) pH dependent  $^1\text{H}$  chemical shift (in  $\text{D}_2\text{O}$ ) of Etp-2'OMe-TpEt (2d) at 298 K

### Et2'OMeTpEt (2d)

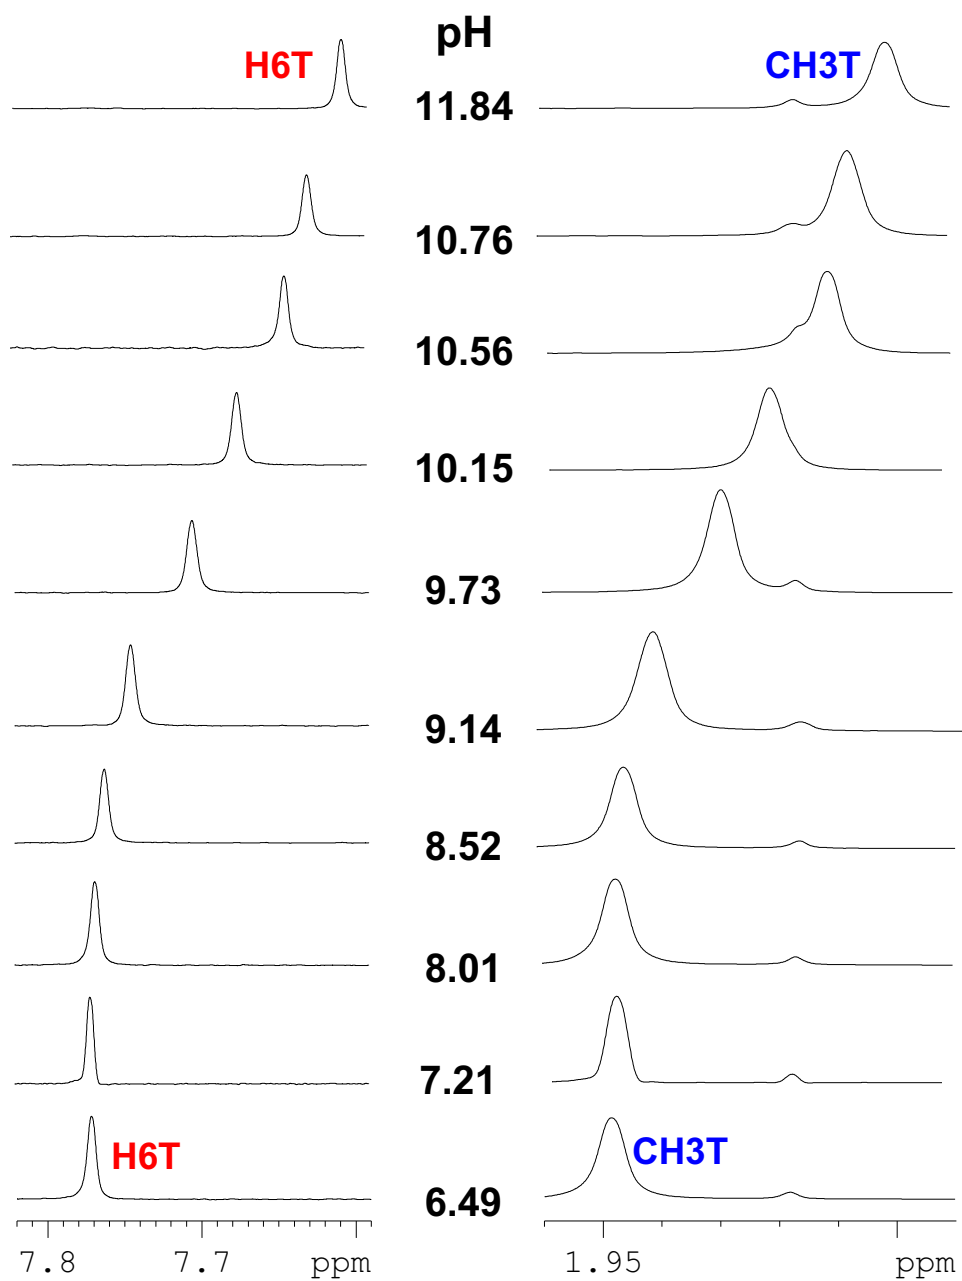

(5) pH dependent  $^1\text{H}$  chemical shift (in  $\text{D}_2\text{O}$ ) of Etp-2'OMe-GpEt for  $N7$  protonation (2b) at 298K

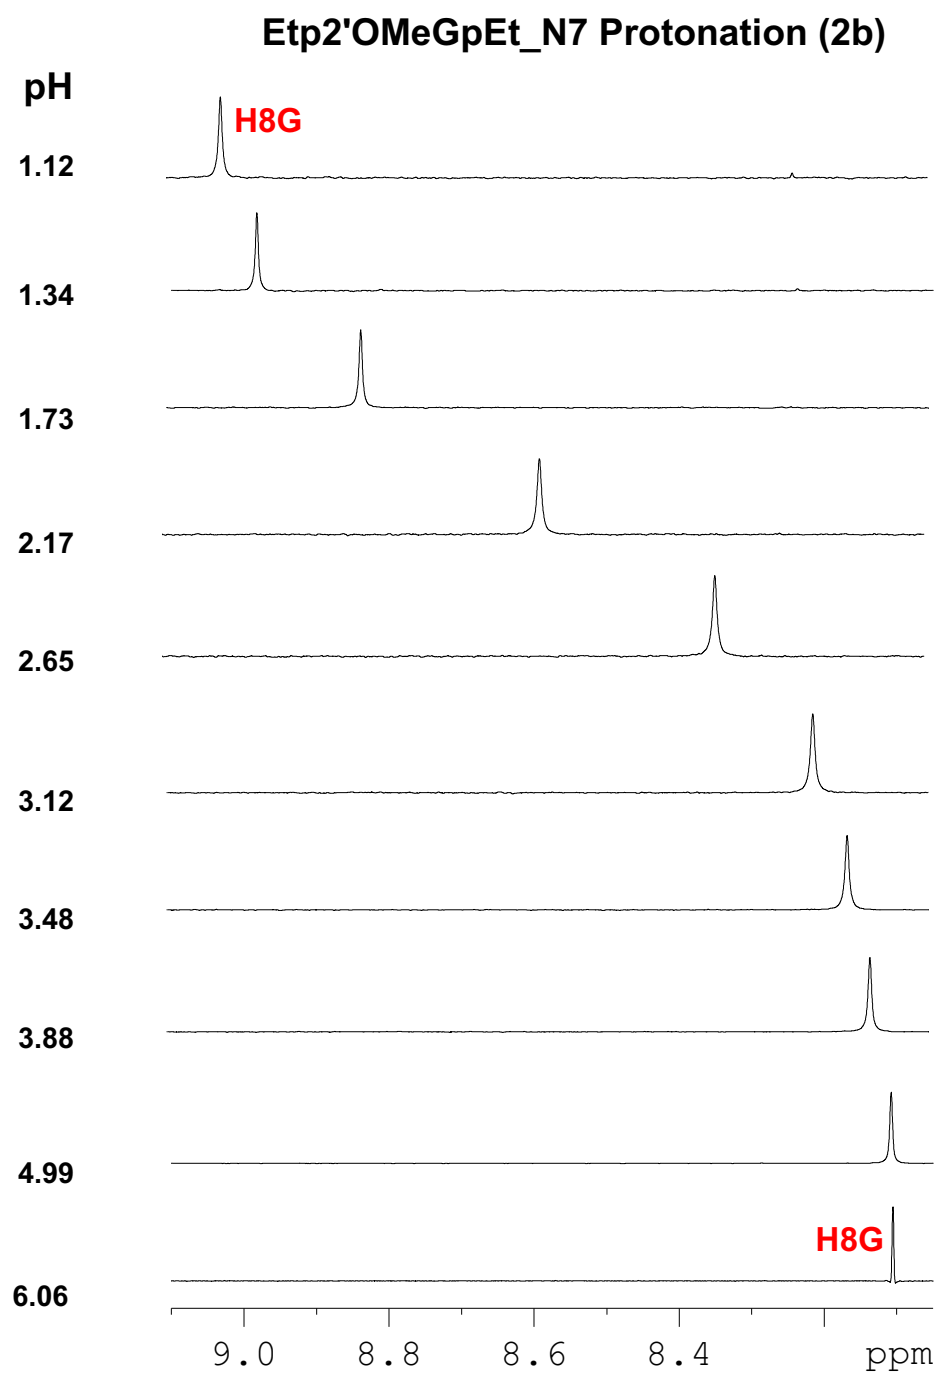

(6) pH dependent  $^1\text{H}$  chemical shift (in  $\text{D}_2\text{O}$ ) of 2'-OMe-ApEt (2f) at 298 K

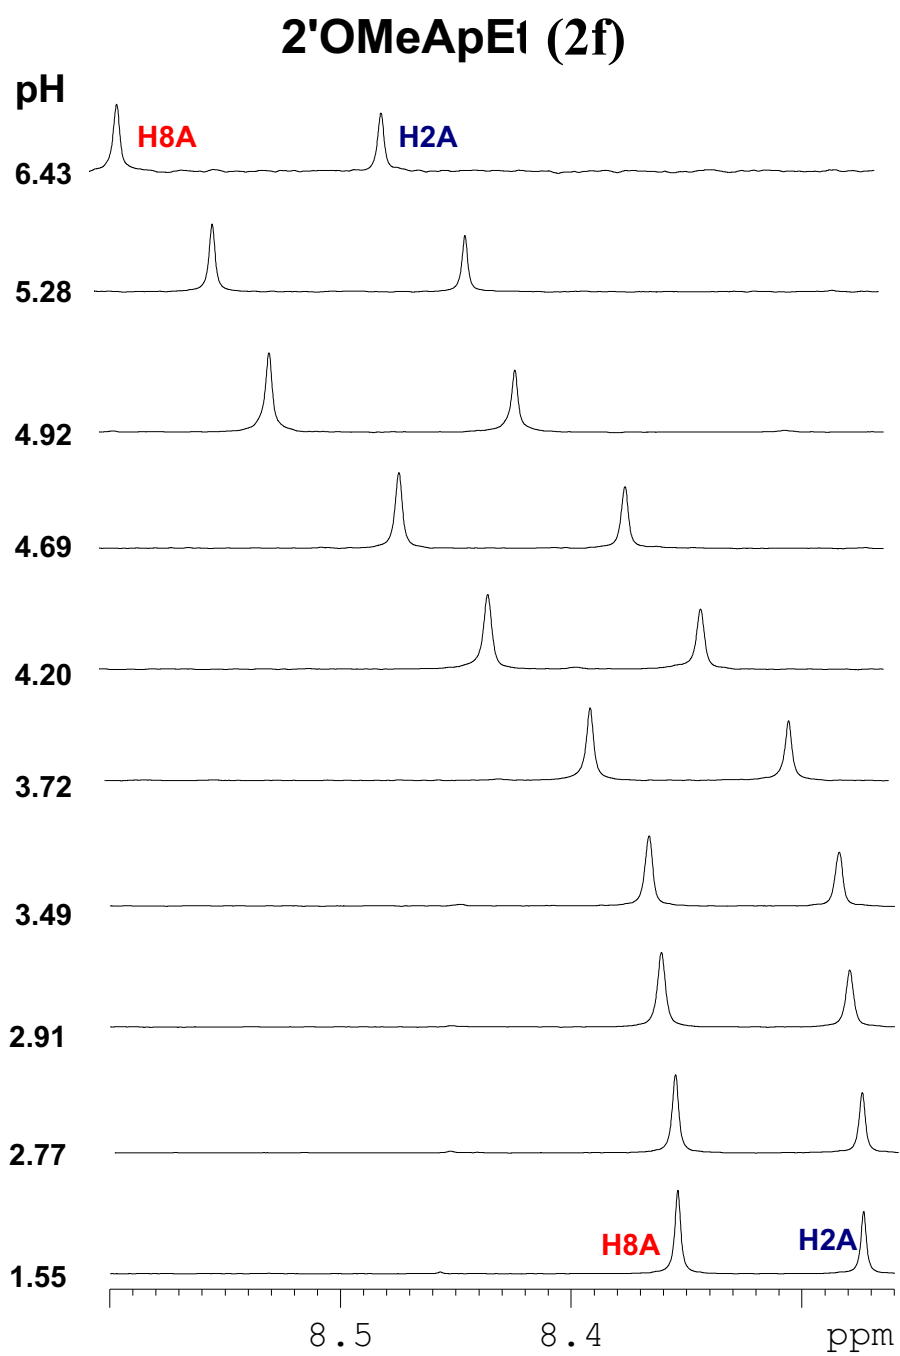



(7) pH dependent  $^1\text{H}$  chemical shift (in  $\text{D}_2\text{O}$ ) of 2'-OMe-GpEt (2g) at 298 K

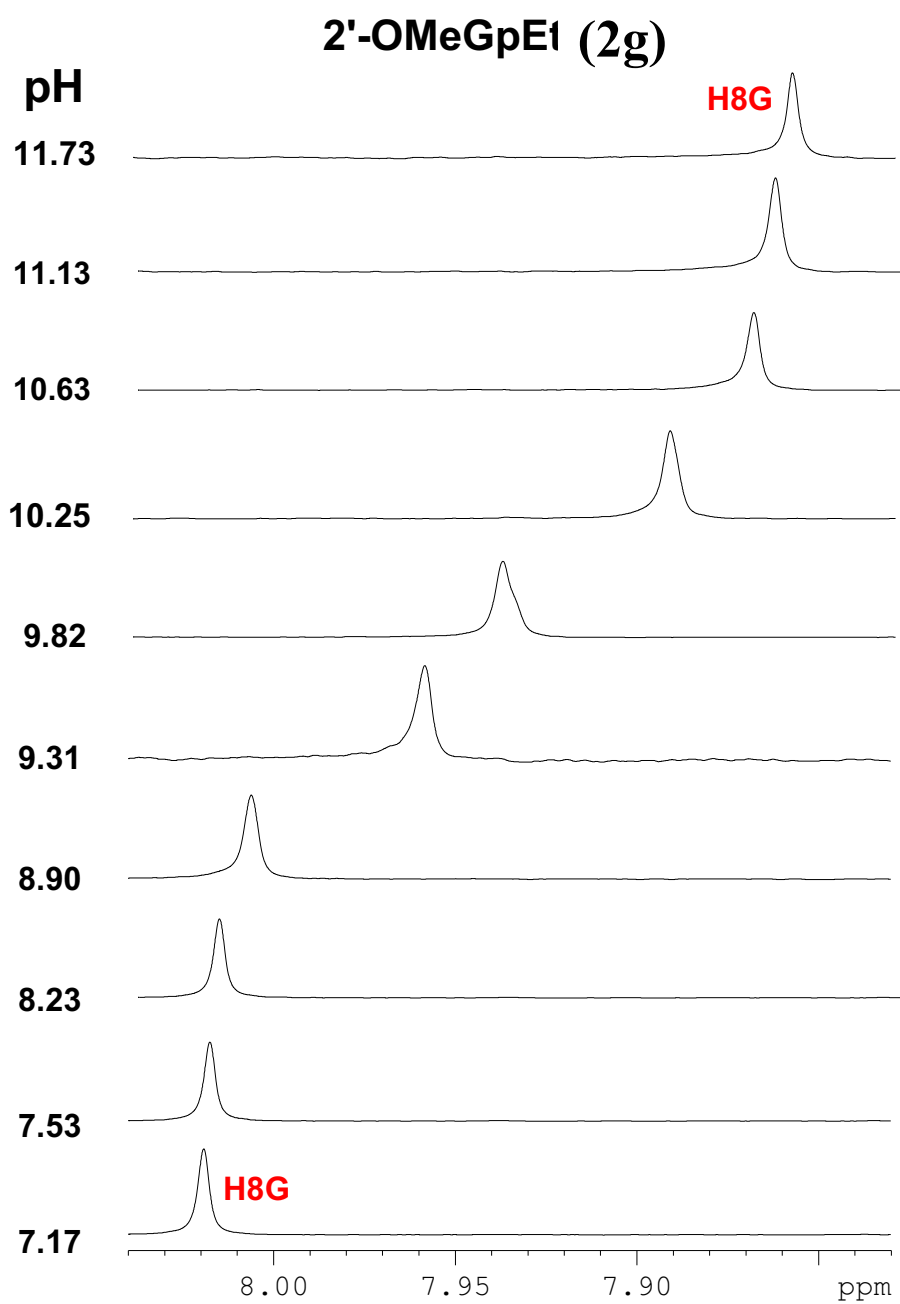

(8) pH dependent  $^1\text{H}$  chemical shift (in  $\text{D}_2\text{O}$ ) of 2'OMe-CpEt (2h) at 298 K

### 2'OMeCpEt (2h)

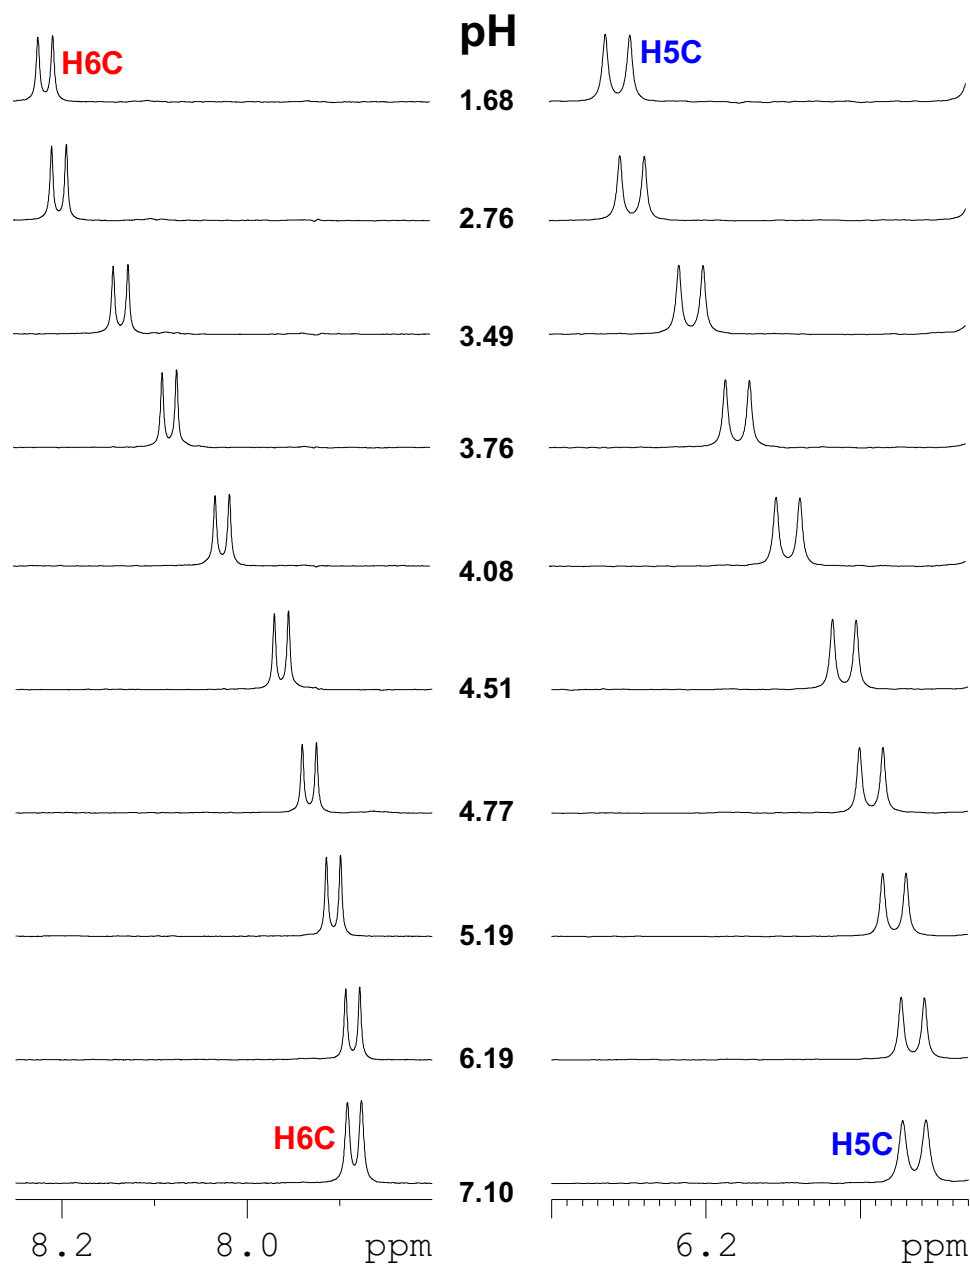

(9) pH dependent  $^1\text{H}$  chemical shift (in  $\text{D}_2\text{O}$ ) of 2'OMe-TpEt (2i) at 298 K

### 2'OMeTpEt (2i)

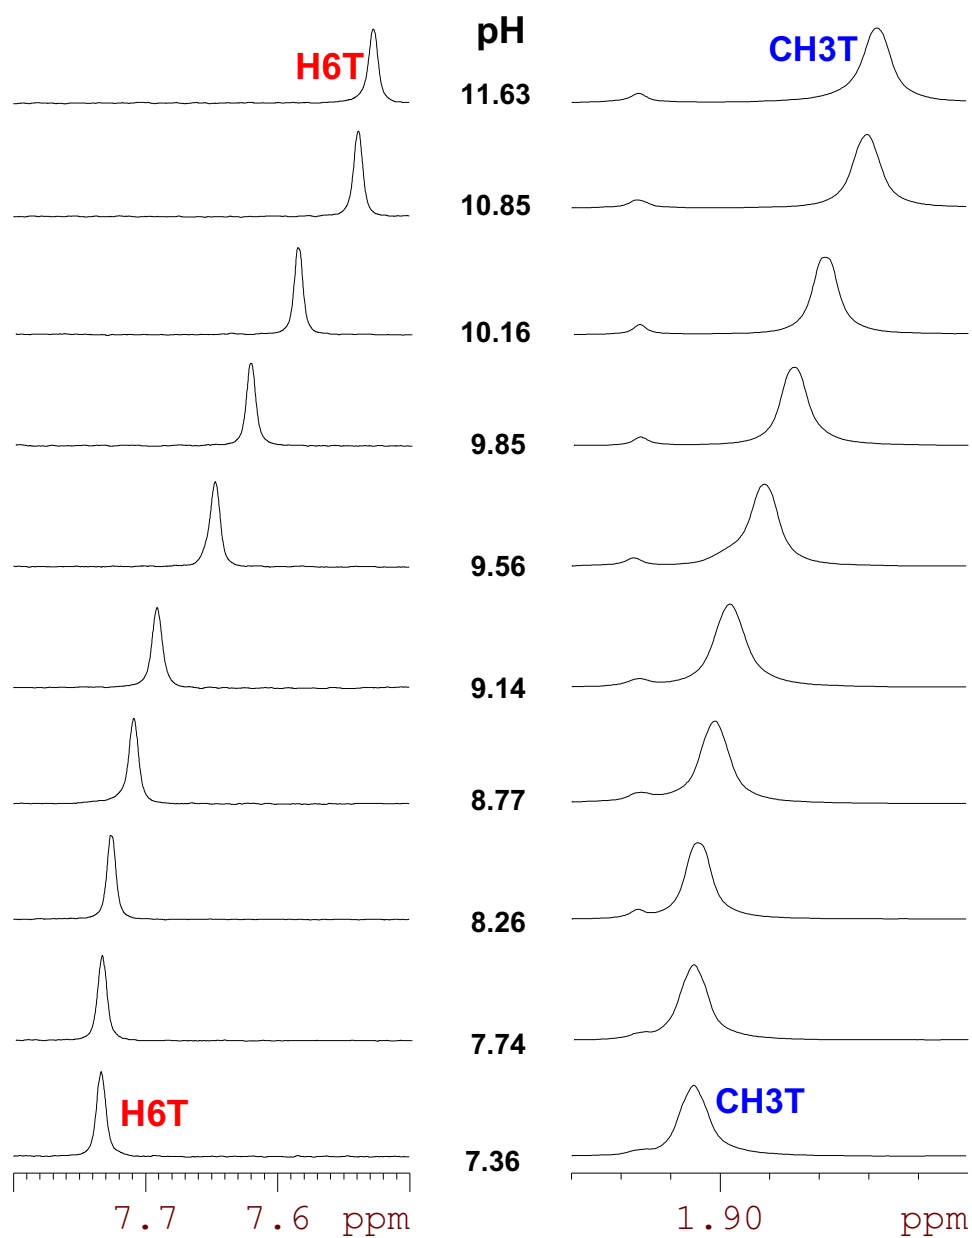

(10) pH dependent  $^1\text{H}$  chemical shift (in  $\text{D}_2\text{O}$ ) of 2'-OMe-GpEt\_N7 (2g) at 298 K

### 2'-OMeGpEt\_N7 (2g)

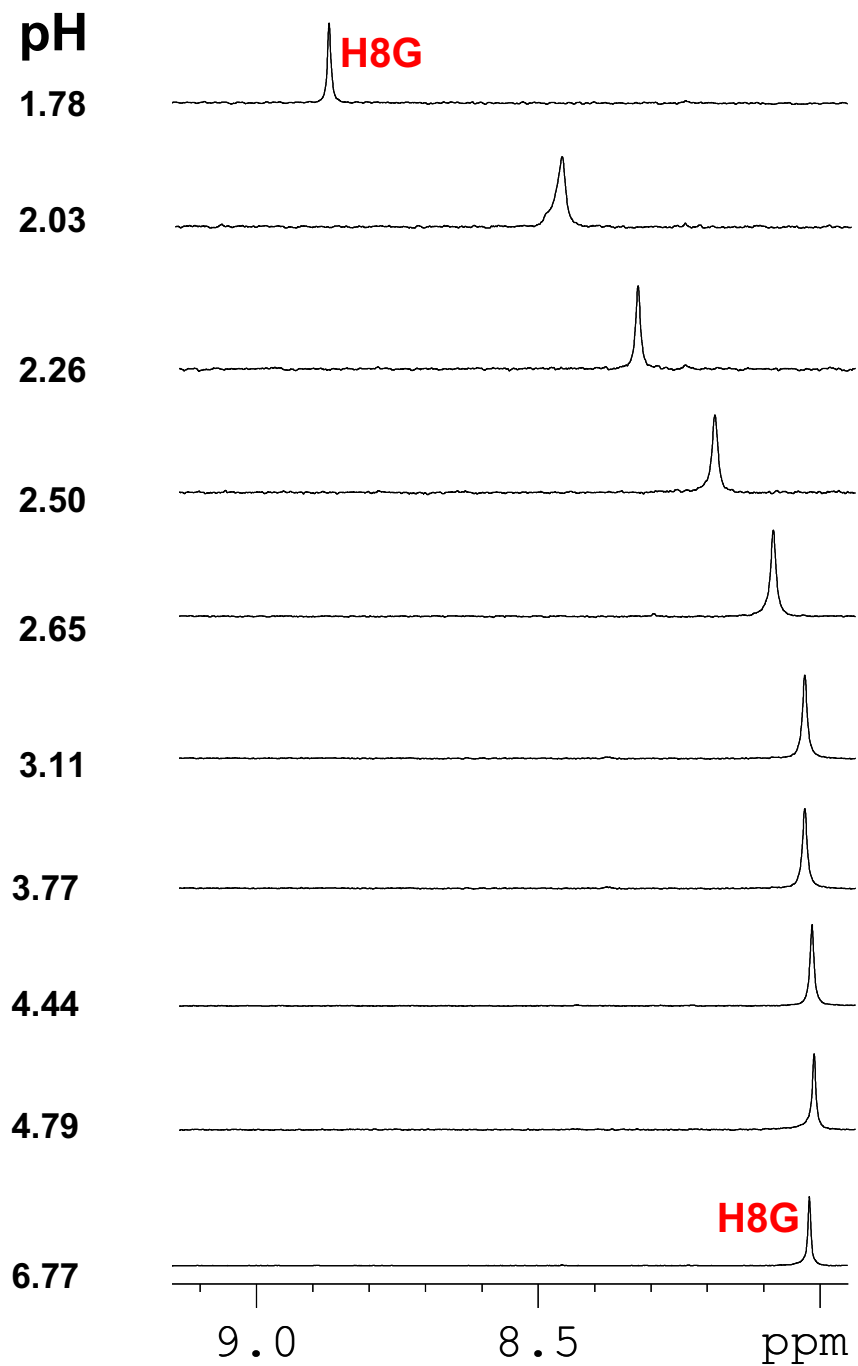

(11) pH dependent  $^1\text{H}$  chemical shift (in  $\text{D}_2\text{O}$ ) of EtpOxeApEt (4a) at 298 K

### EtpoxeApEt (4a)

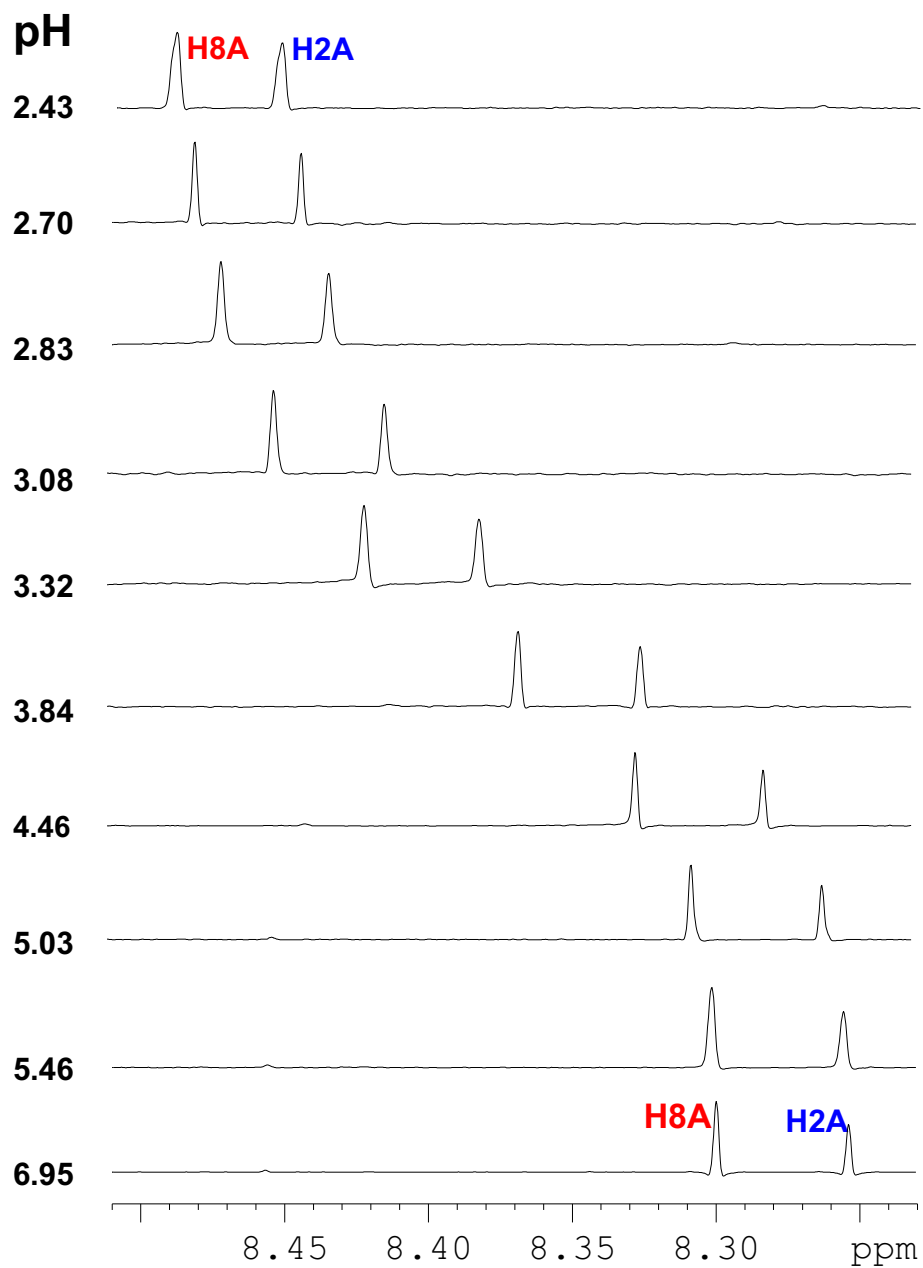

(12) pH dependent  $^1\text{H}$  chemical shift (in  $\text{D}_2\text{O}$ ) of EtpOxeGpEt (4b) at 298 K

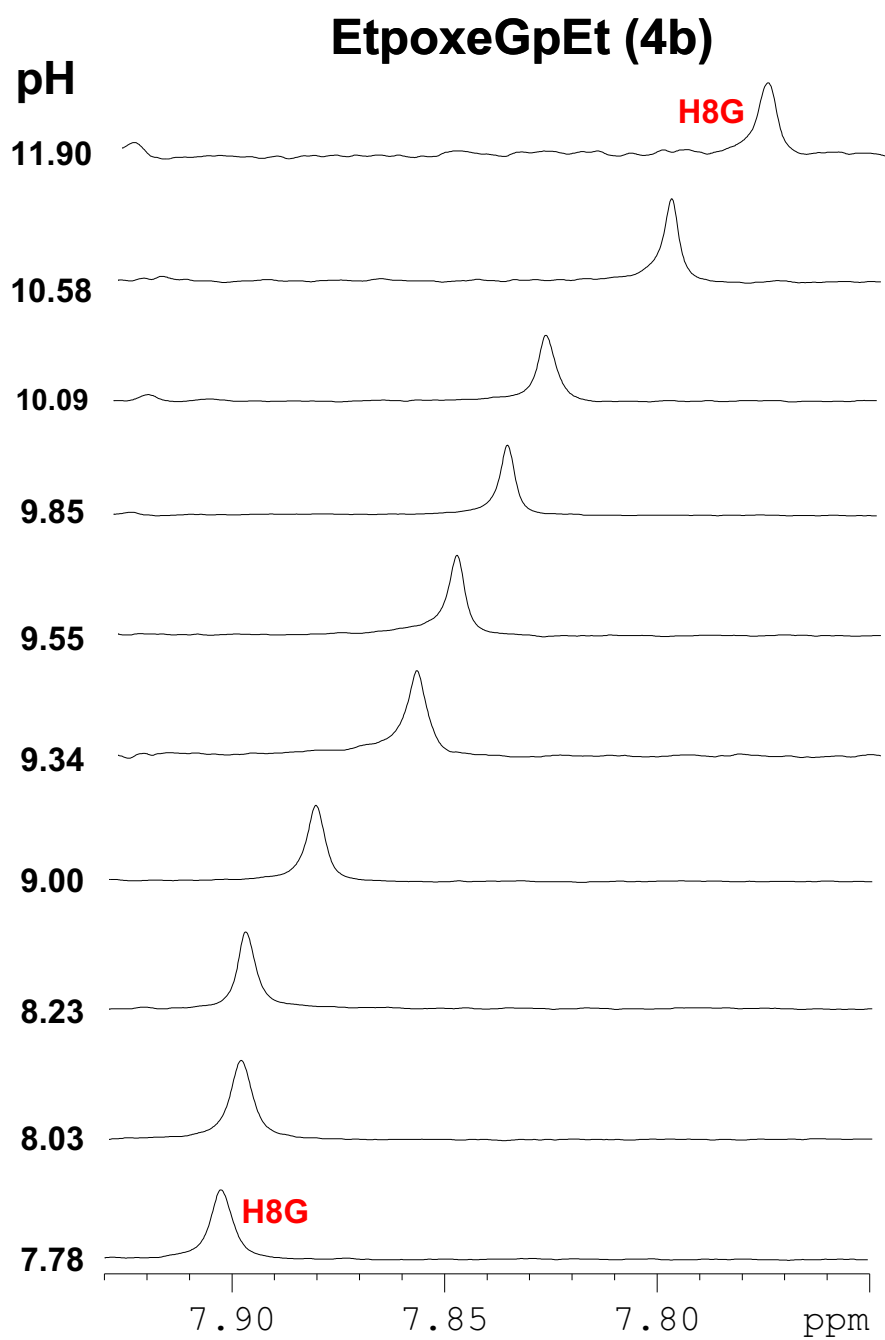

(13) pH dependent  $^1\text{H}$  chemical shift (in  $\text{D}_2\text{O}$ ) of EtpOxeCpEt (4c) at 298 K

### EtpoxeCpEt (4c)

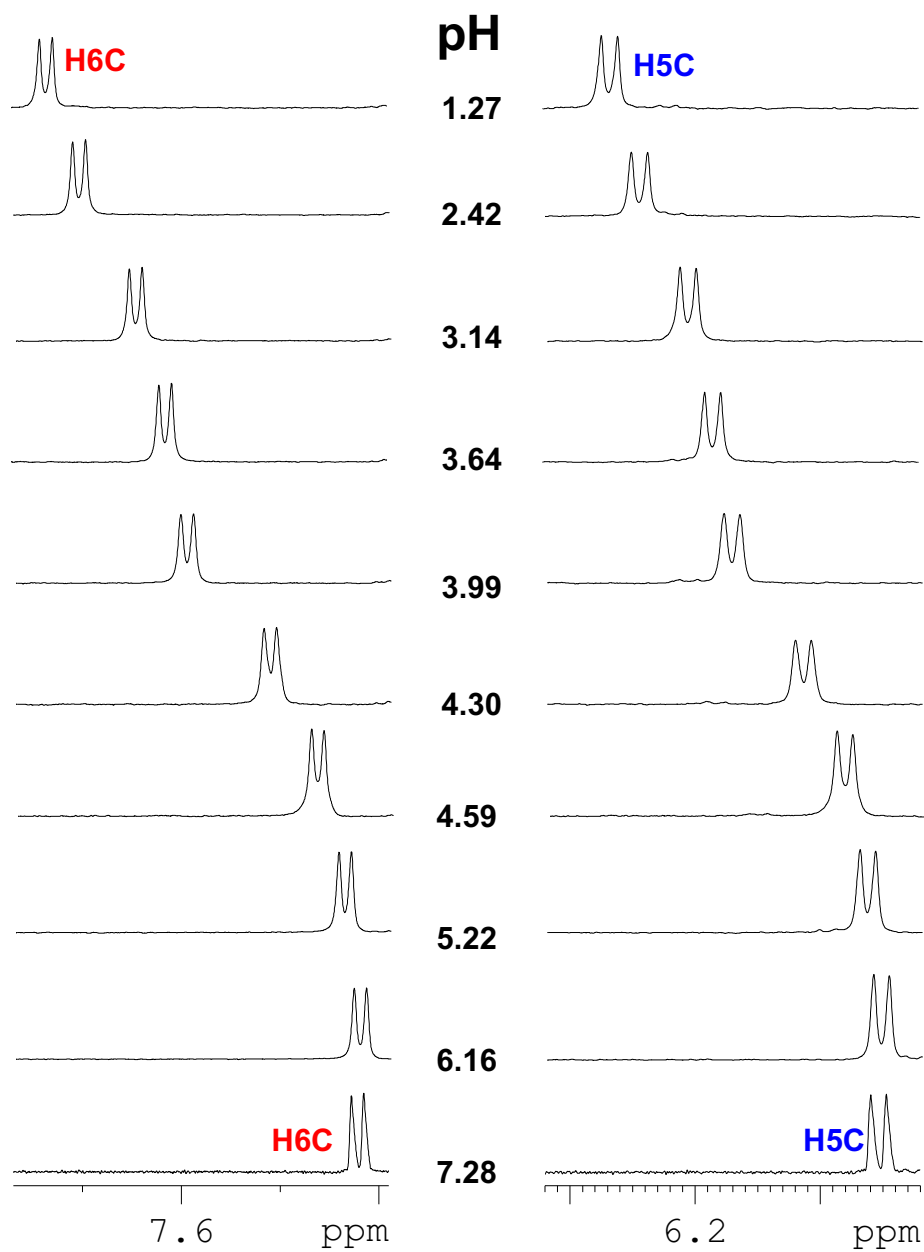

(14) pH dependent  $^1\text{H}$  chemical shift (in  $\text{D}_2\text{O}$ ) of EtpOxeTpEt (4d) at 298 K

### EtpoxeTpEt (4d)

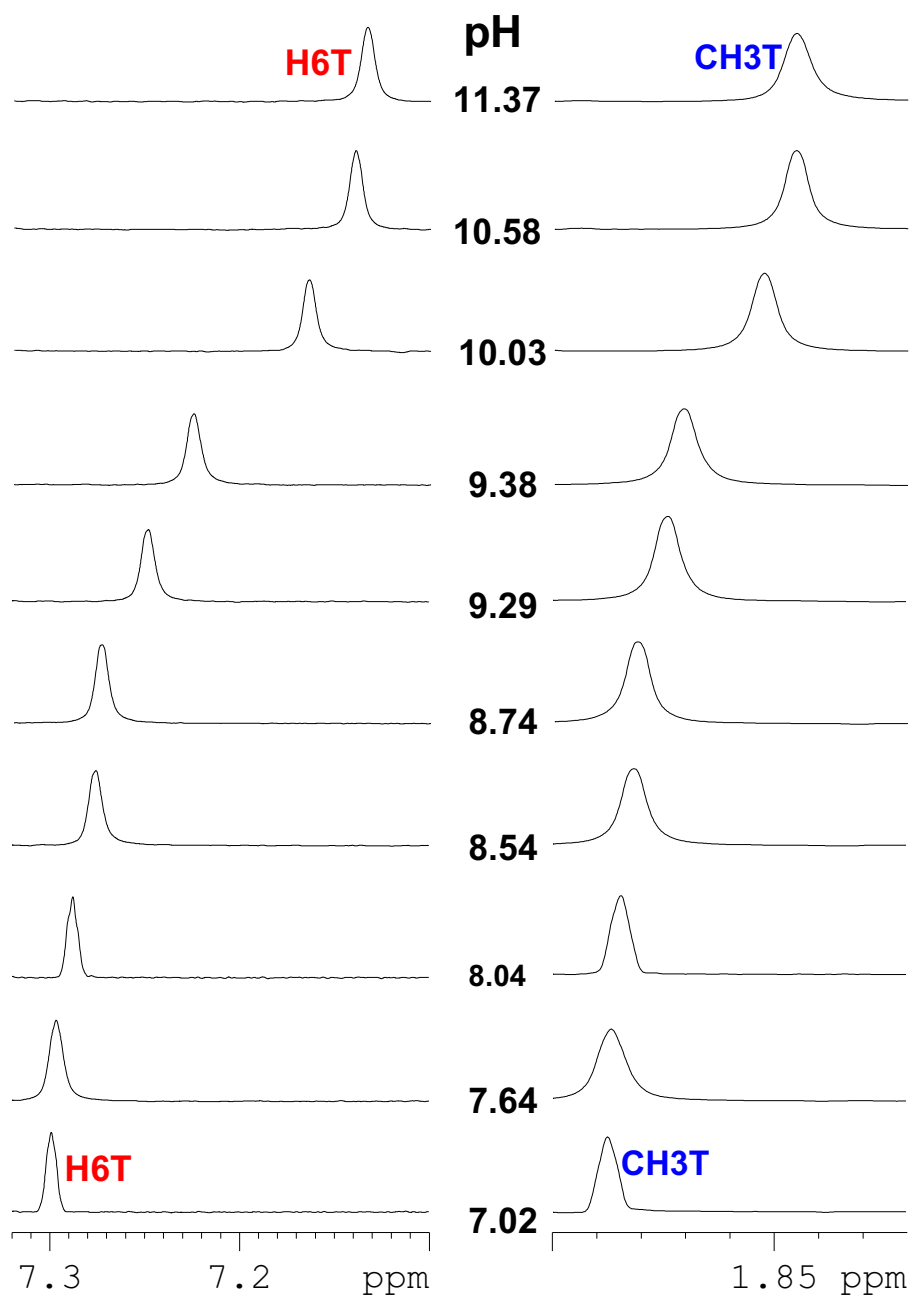



(15) pH dependent  $^1\text{H}$  chemical shift (in  $\text{D}_2\text{O}$ ) of EtpOxeUpEt (4e) at 298 K

### EtpoxeUpEt (4e)

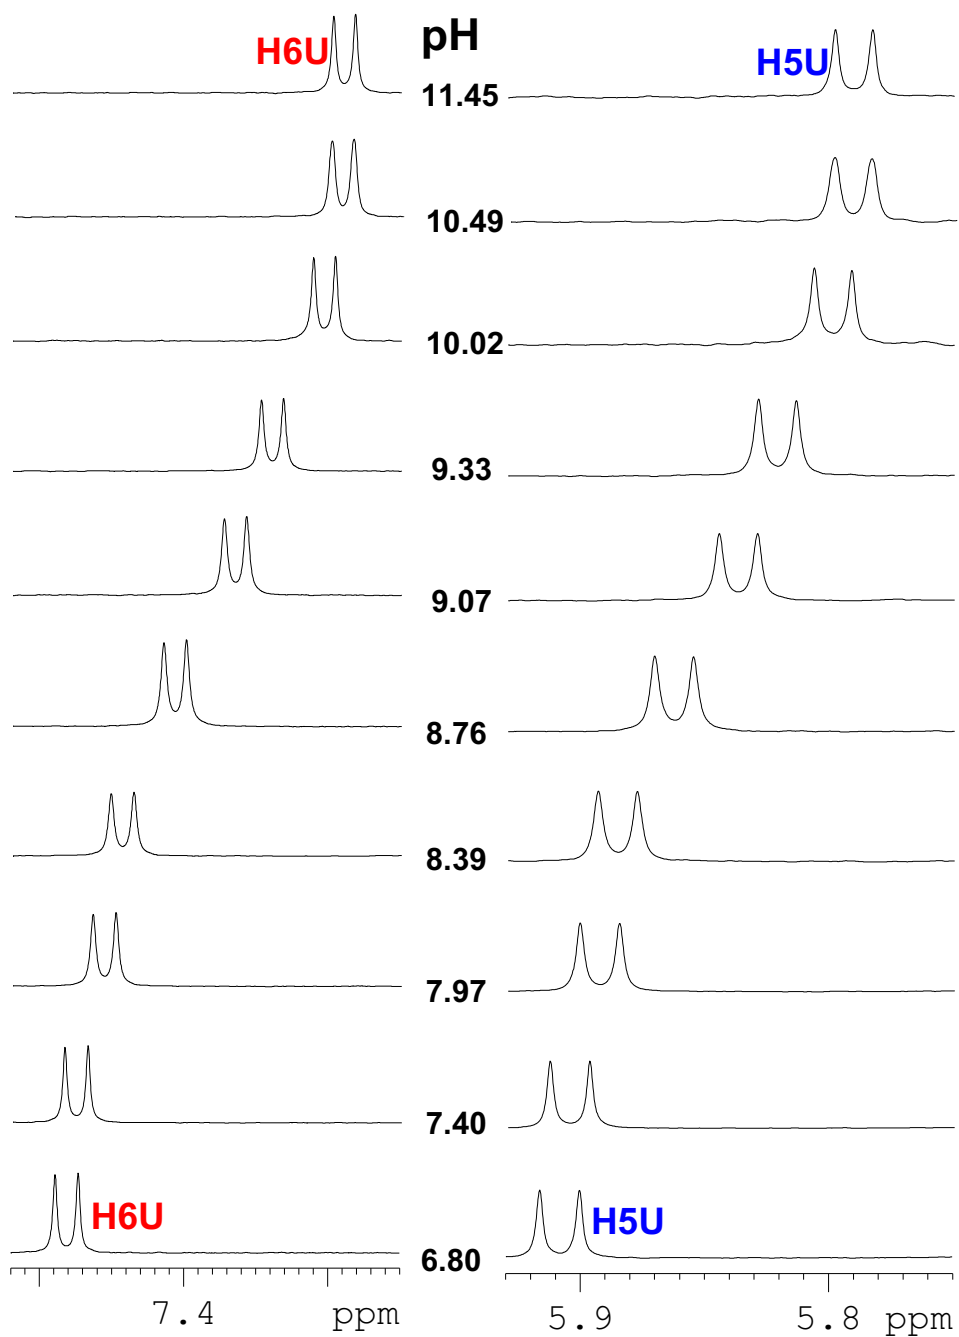

(16) pH dependent  $^1\text{H}$  chemical shift (in  $\text{D}_2\text{O}$ ) of OxeApEt (4f) at 298 K

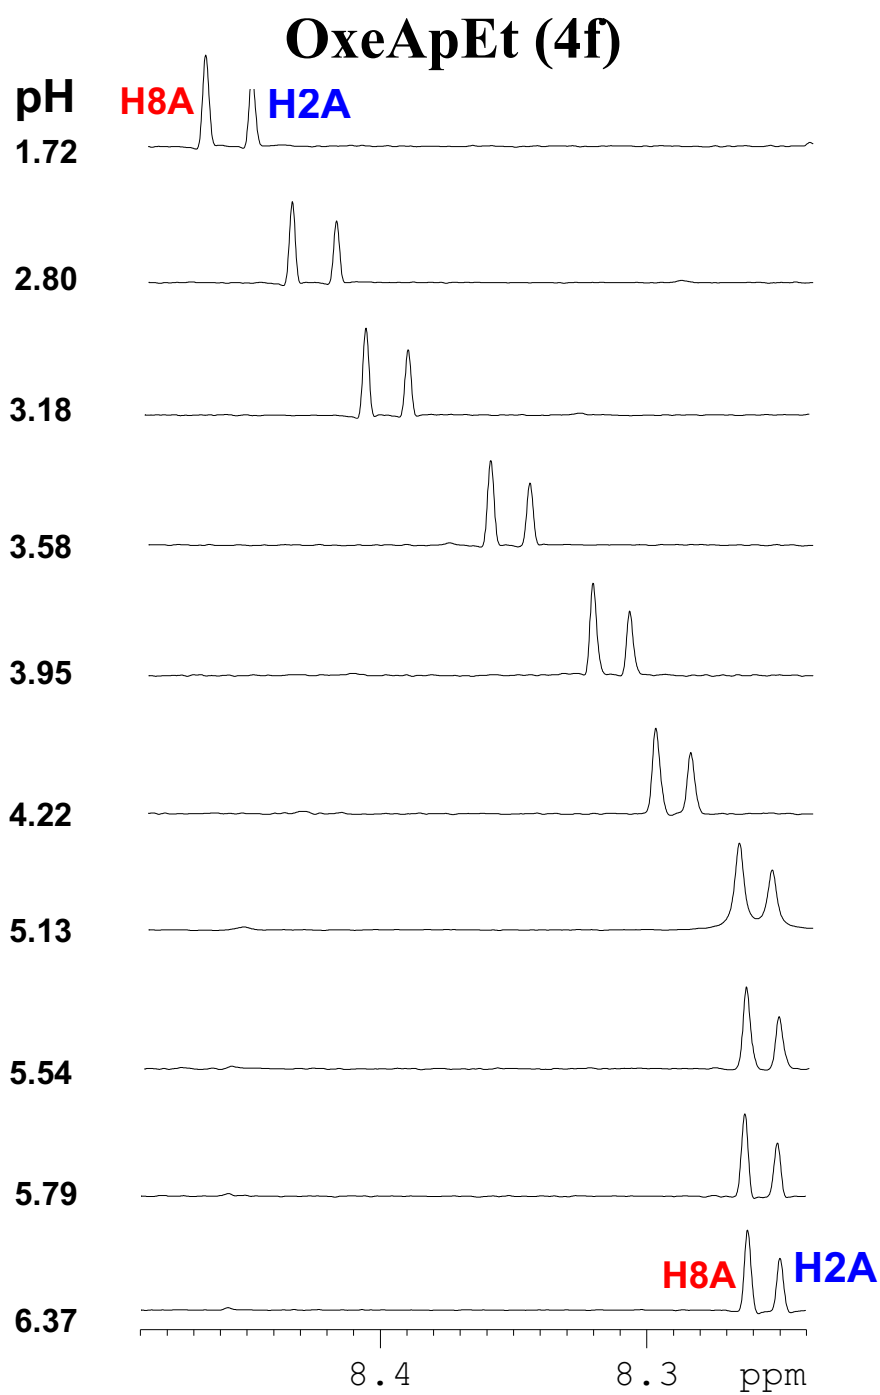

(17) pH dependent  $^1\text{H}$  chemical shift (in  $\text{D}_2\text{O}$ ) of OxeGpEt (4g) at 298 K

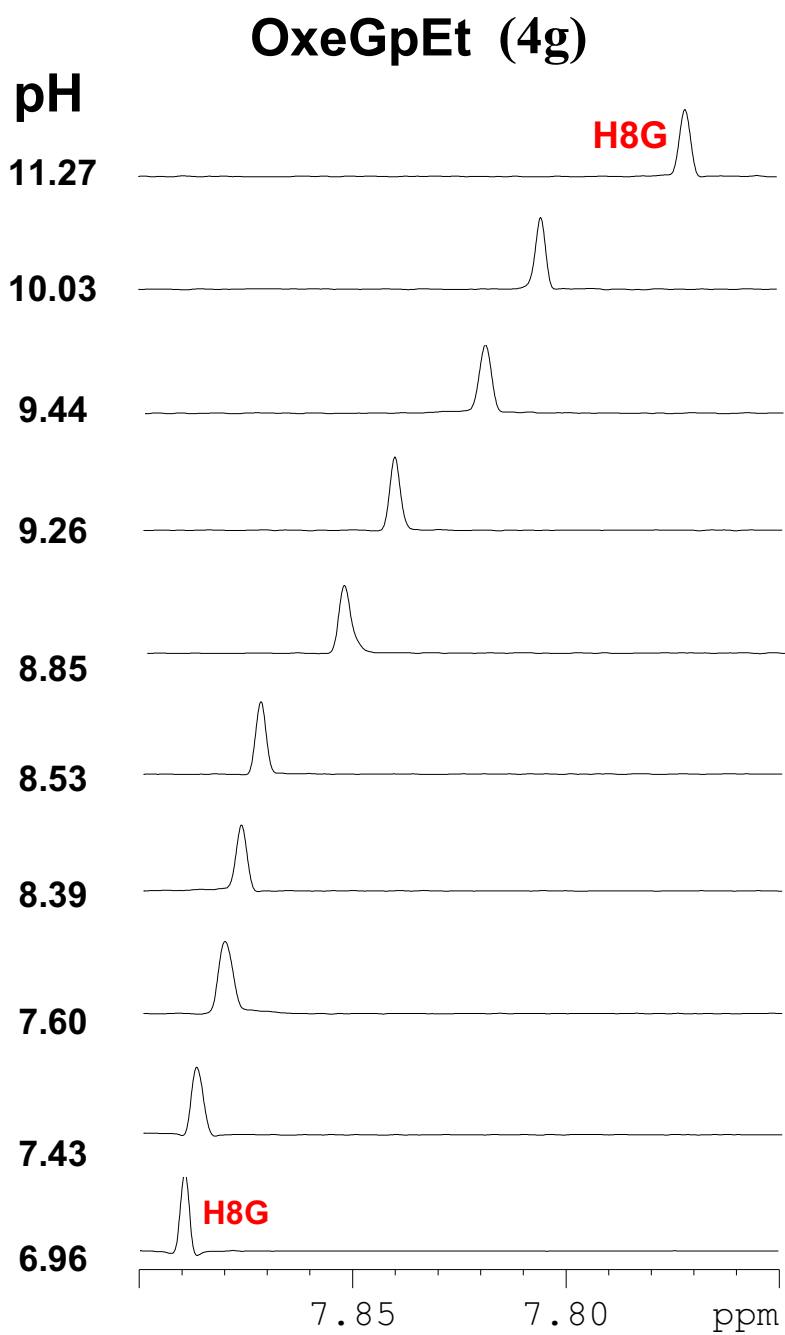

(18) pH dependent  $^1\text{H}$  chemical shift (in  $\text{D}_2\text{O}$ ) of OxeCpEt (4h) at 298 K

### OxeCpEt (4h)

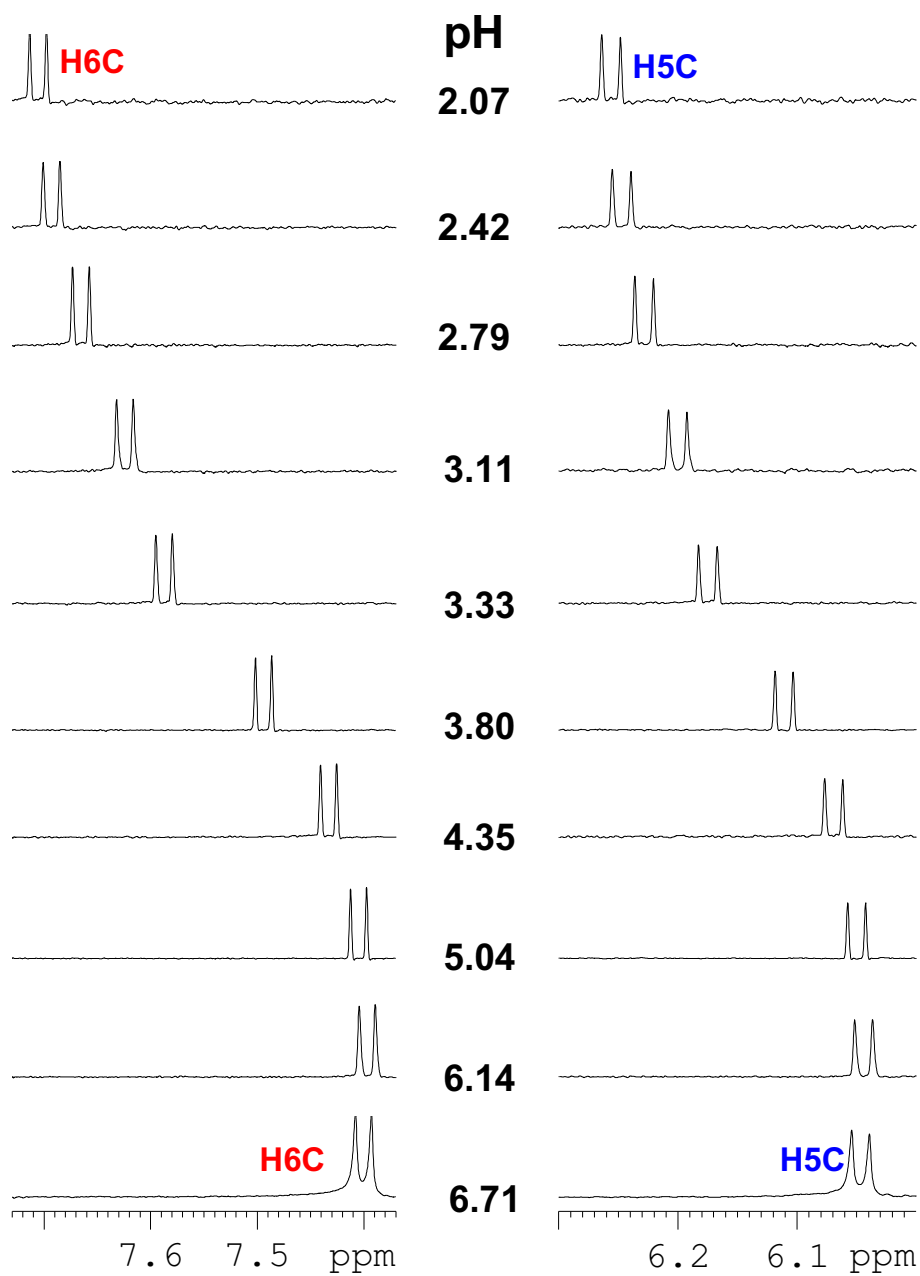

(19) pH dependent  $^1\text{H}$  chemical shift (in  $\text{D}_2\text{O}$ ) of OxeTpEt (4i) at 298 K

## OxeTpEt (4i)

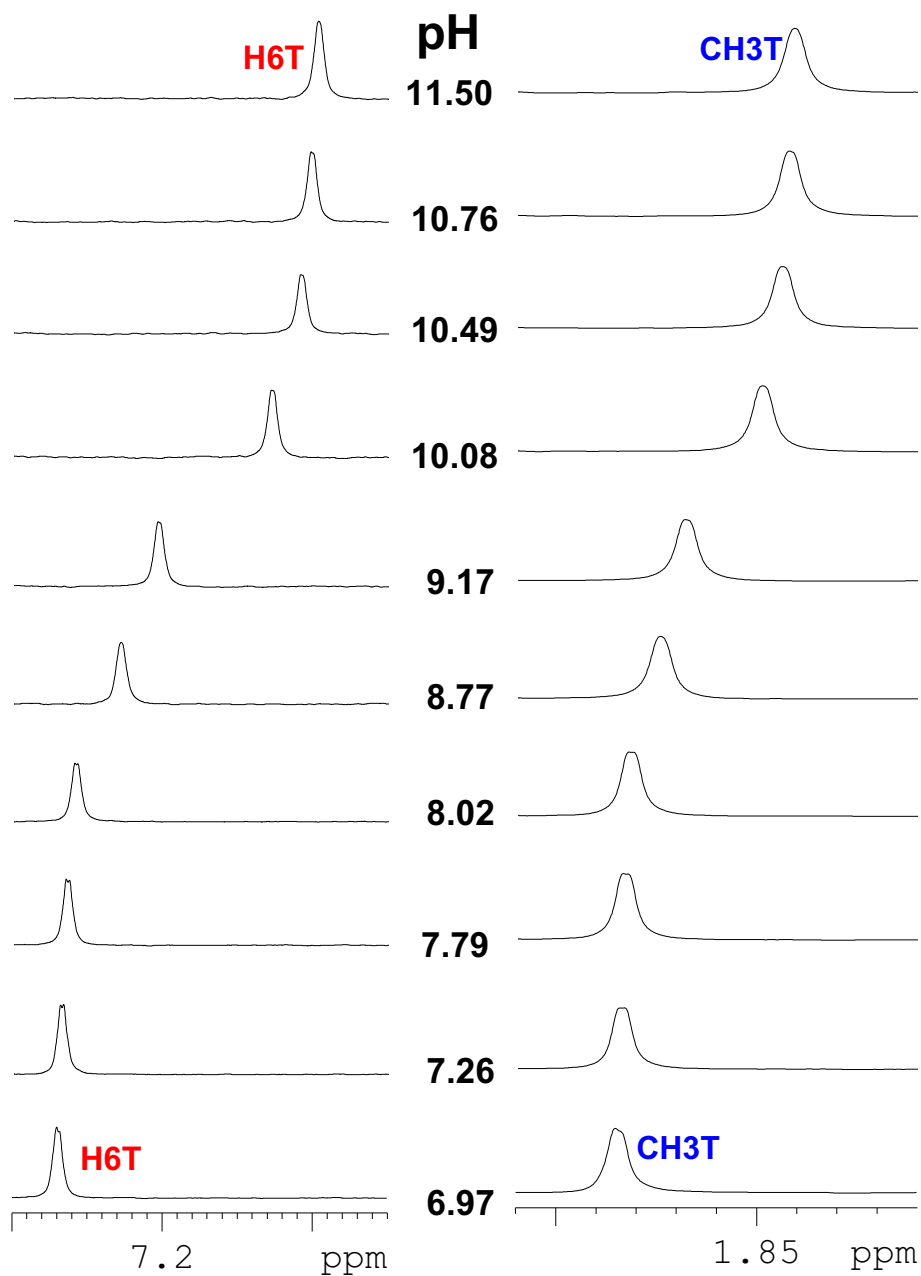

(20) pH dependent  $^1\text{H}$  chemical shift (in  $\text{D}_2\text{O}$ ) of OxeUpEt (4j) at 298 K

### OxeUpEt (4j)

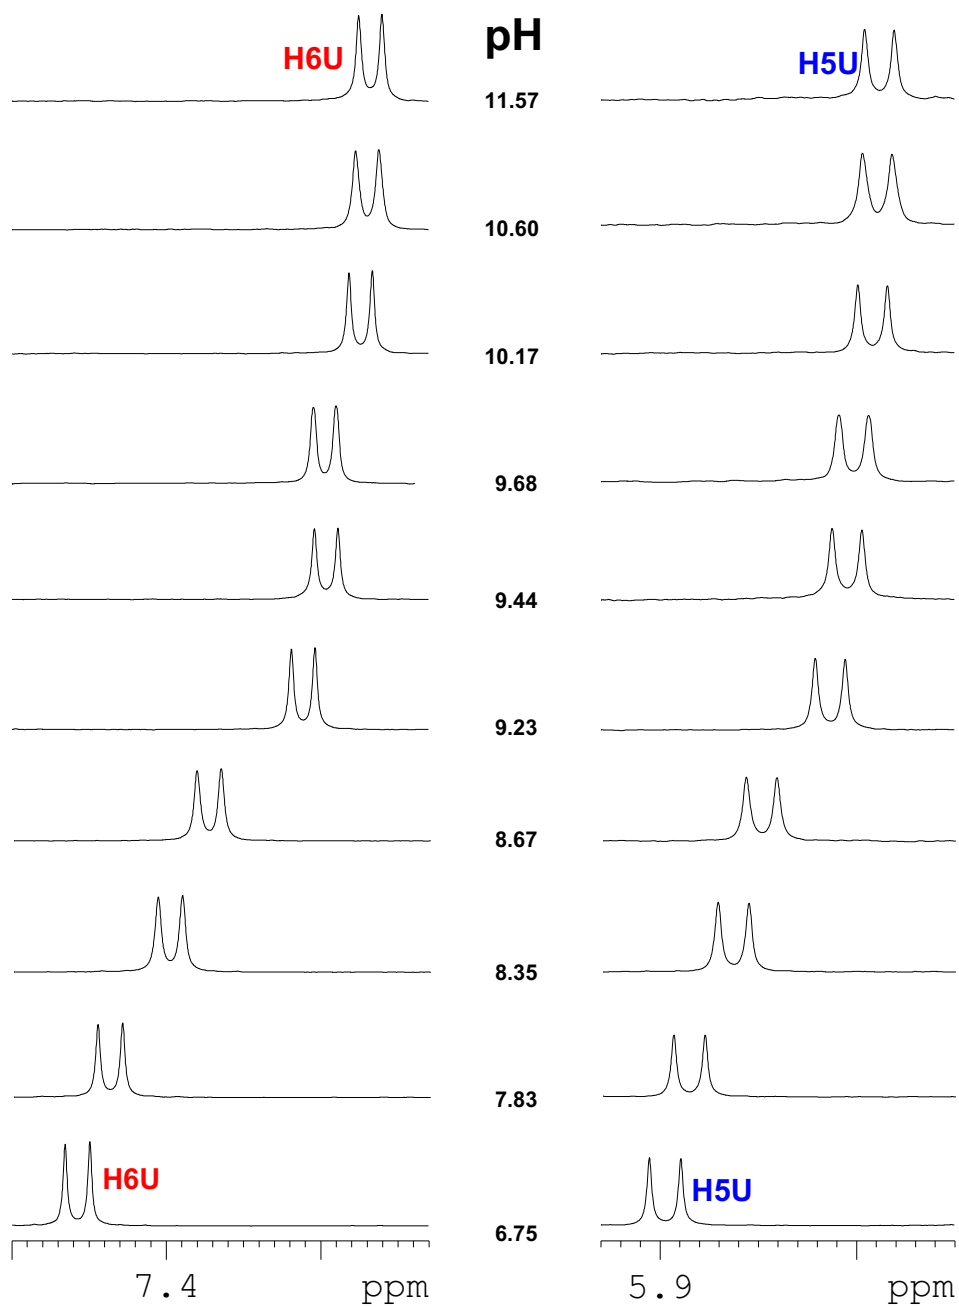

(21) pH dependent  $^1\text{H}$  chemical shift (in  $\text{D}_2\text{O}$ ) of OxeGpEt (4g) at 298 K

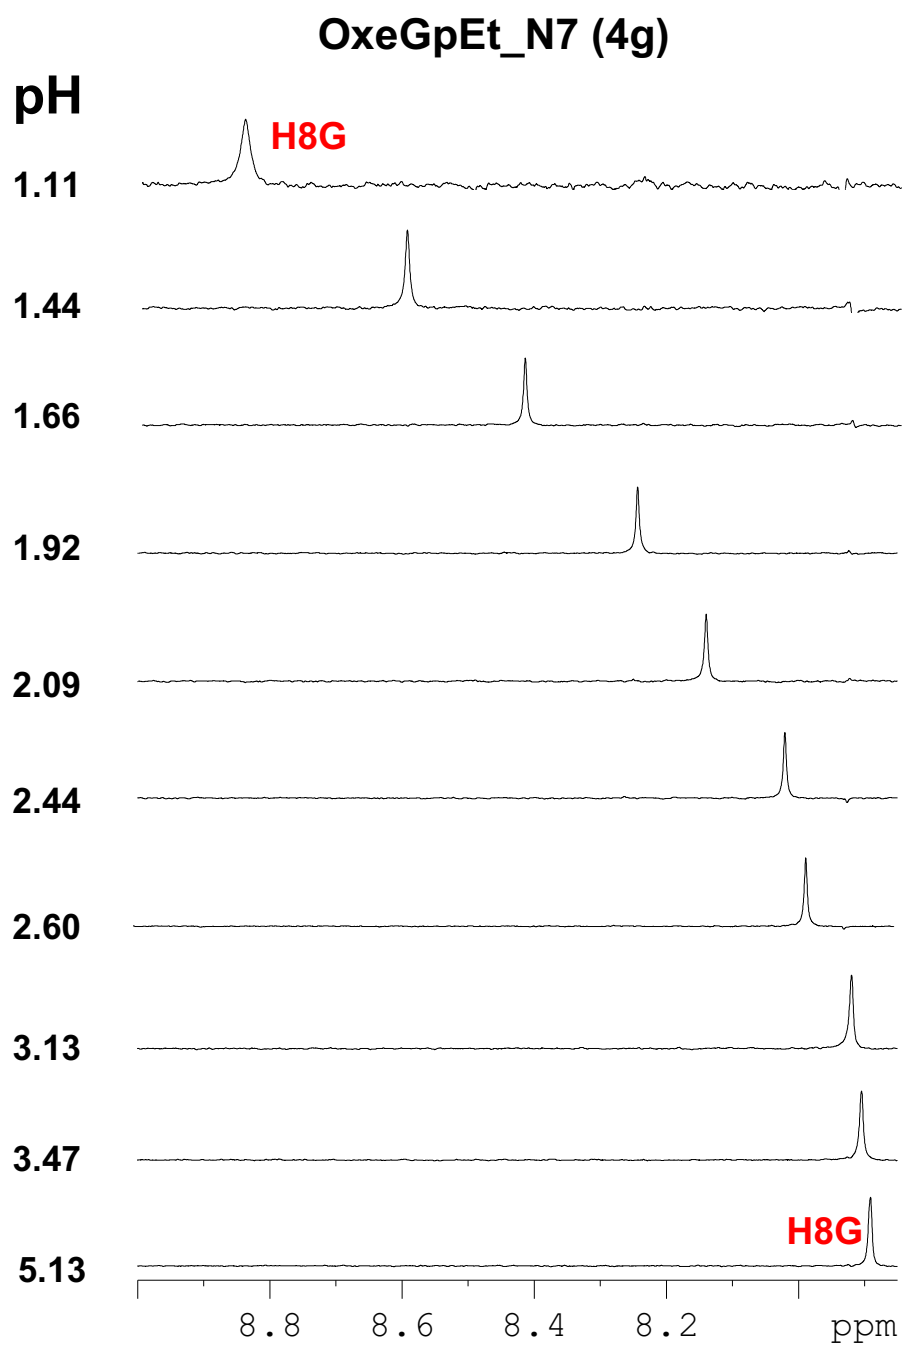

(22) pH dependent  $^1\text{H}$  chemical shift (in  $\text{D}_2\text{O}$ ) of EtpAzeCpEt (5c) at 298 K

### EtpAzeCpEt\_pH (5c)

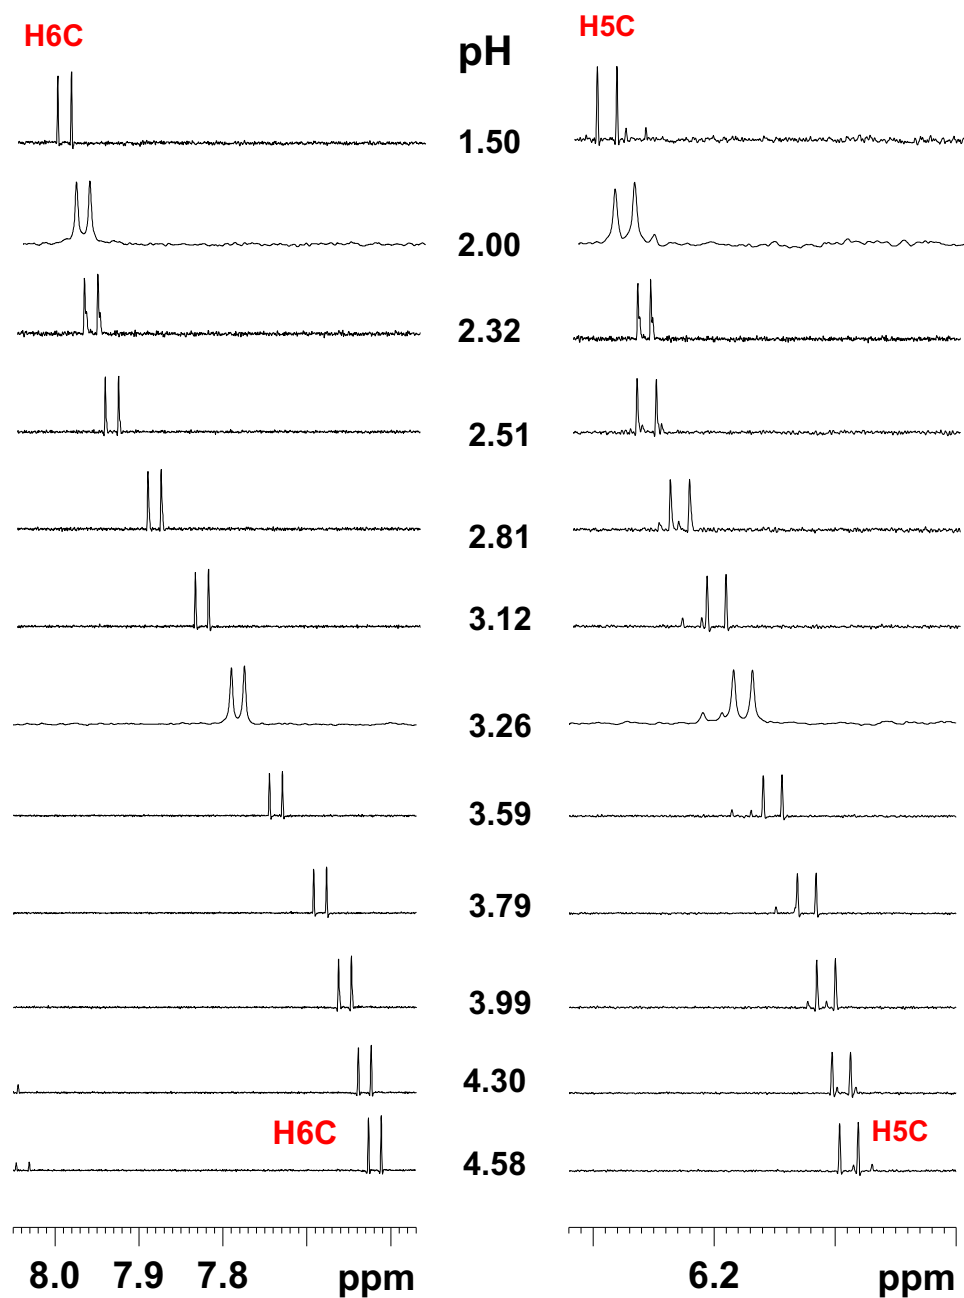



(23) pH dependent  $^1\text{H}$  chemical shift (in  $\text{D}_2\text{O}$ ) of EtpAzeCpEt azetidine protonation (5c) at 298 K

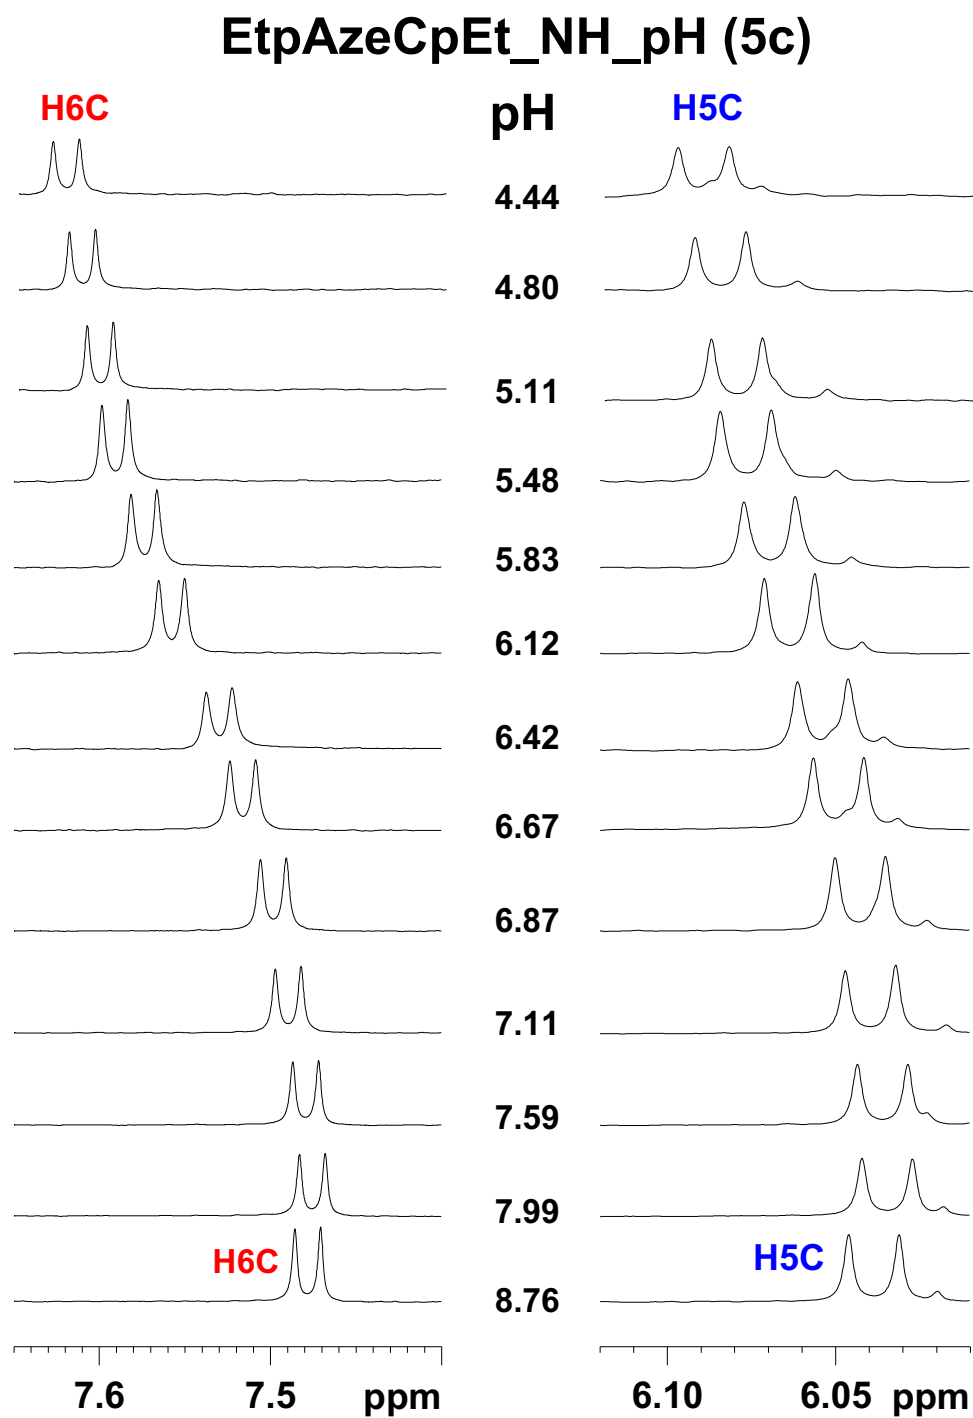

(24) pH dependent  $^1\text{H}$  chemical shift (in  $\text{D}_2\text{O}$ ) of EtpAzeTpEt (5d) at 298 K

### EtpAzeTpEt\_pH (5d)

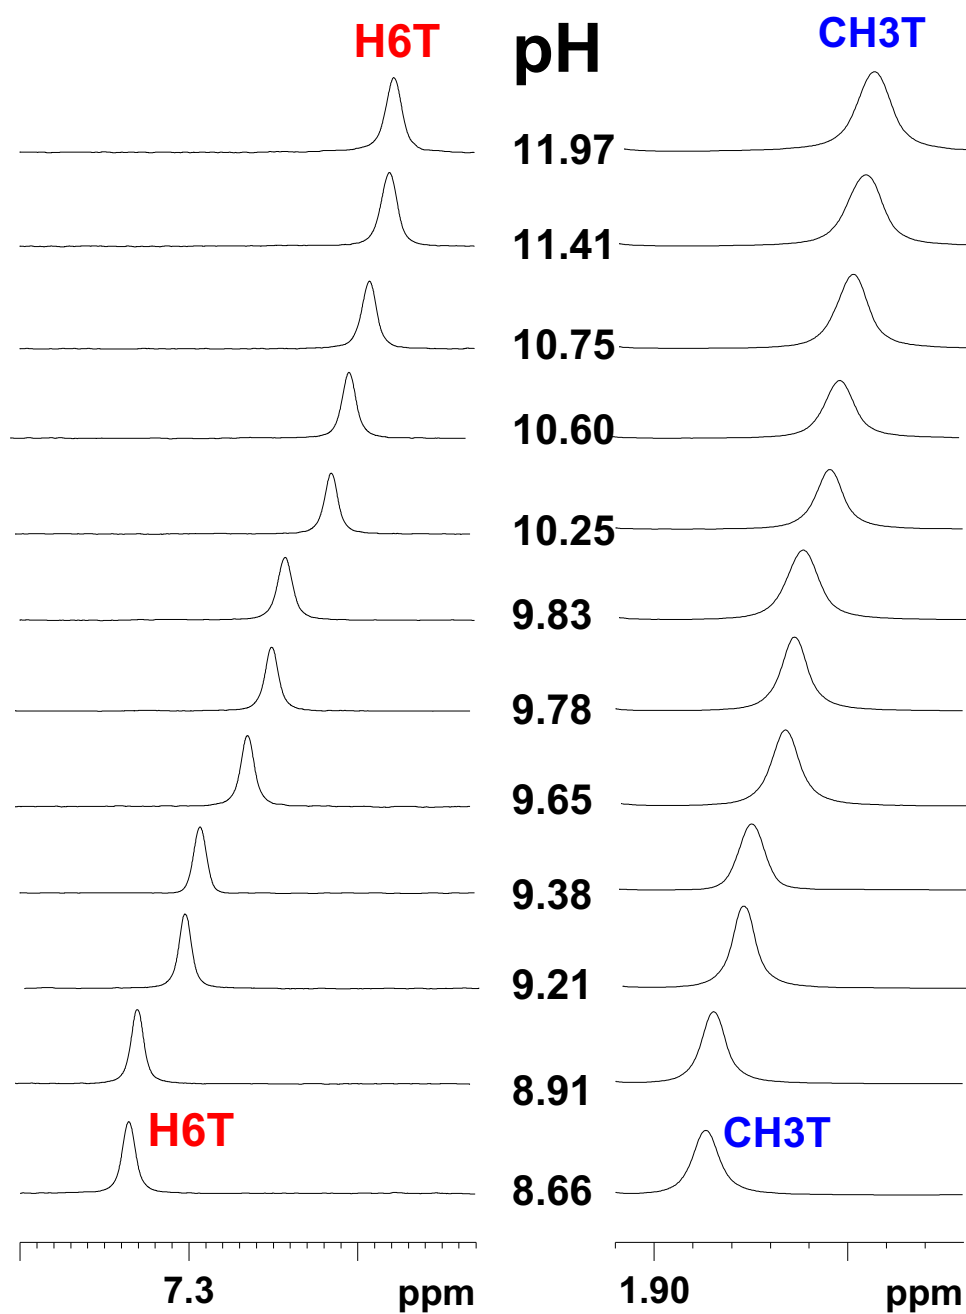

(25) pH dependent  $^1\text{H}$  chemical shift (in  $\text{D}_2\text{O}$ ) of EtpAzeTpEt azetidine protonation (5d) at 298 K

### EtpAzeTpEt\_NH\_pH (5d)

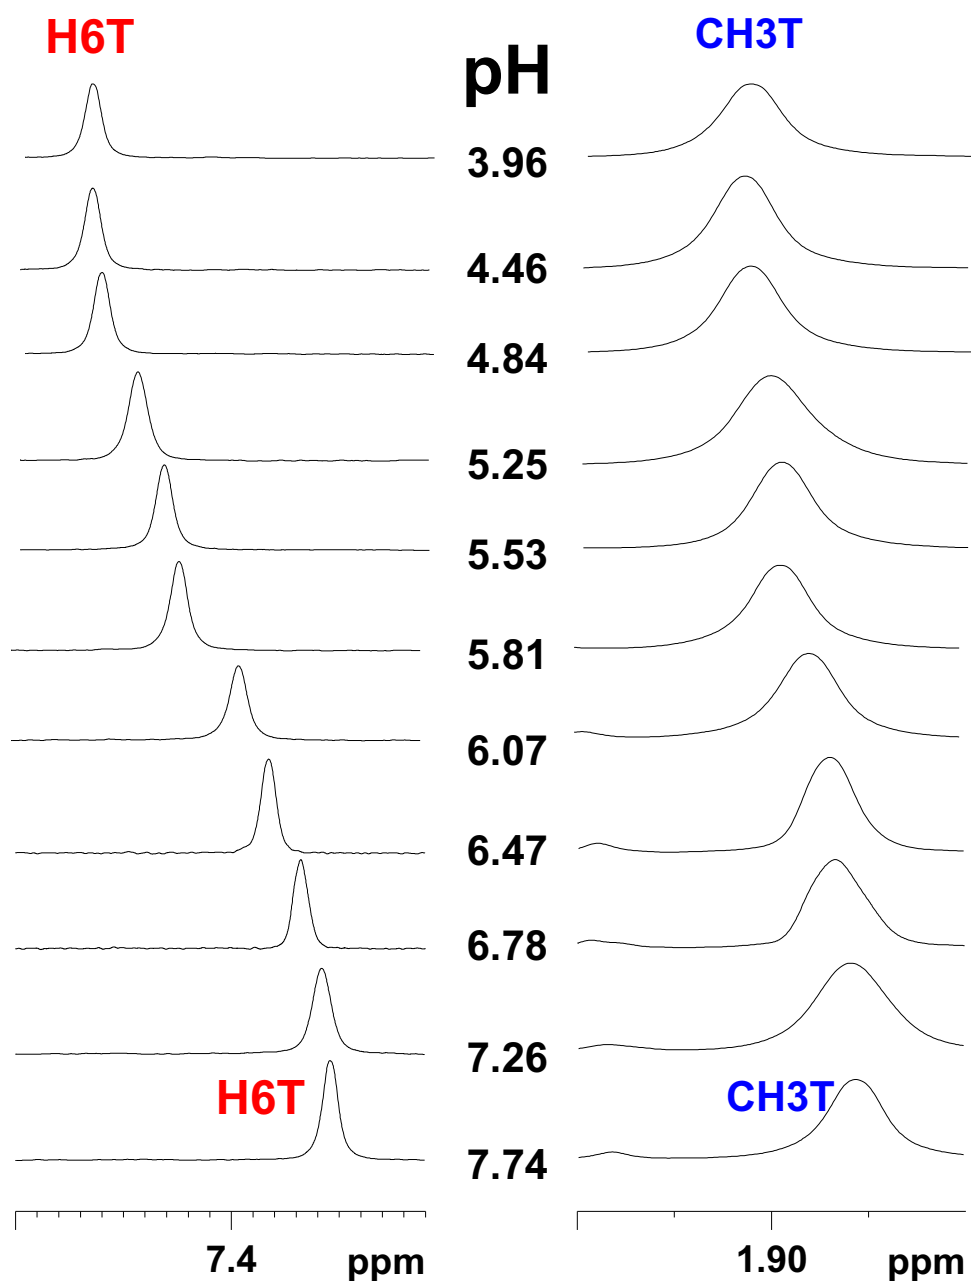

(26) pH dependent  $^1\text{H}$  chemical shift (in  $\text{D}_2\text{O}$ ) of EtpAzeUpEt (5e) at 298 K

### EtpAzeUpEt\_pH (5e)

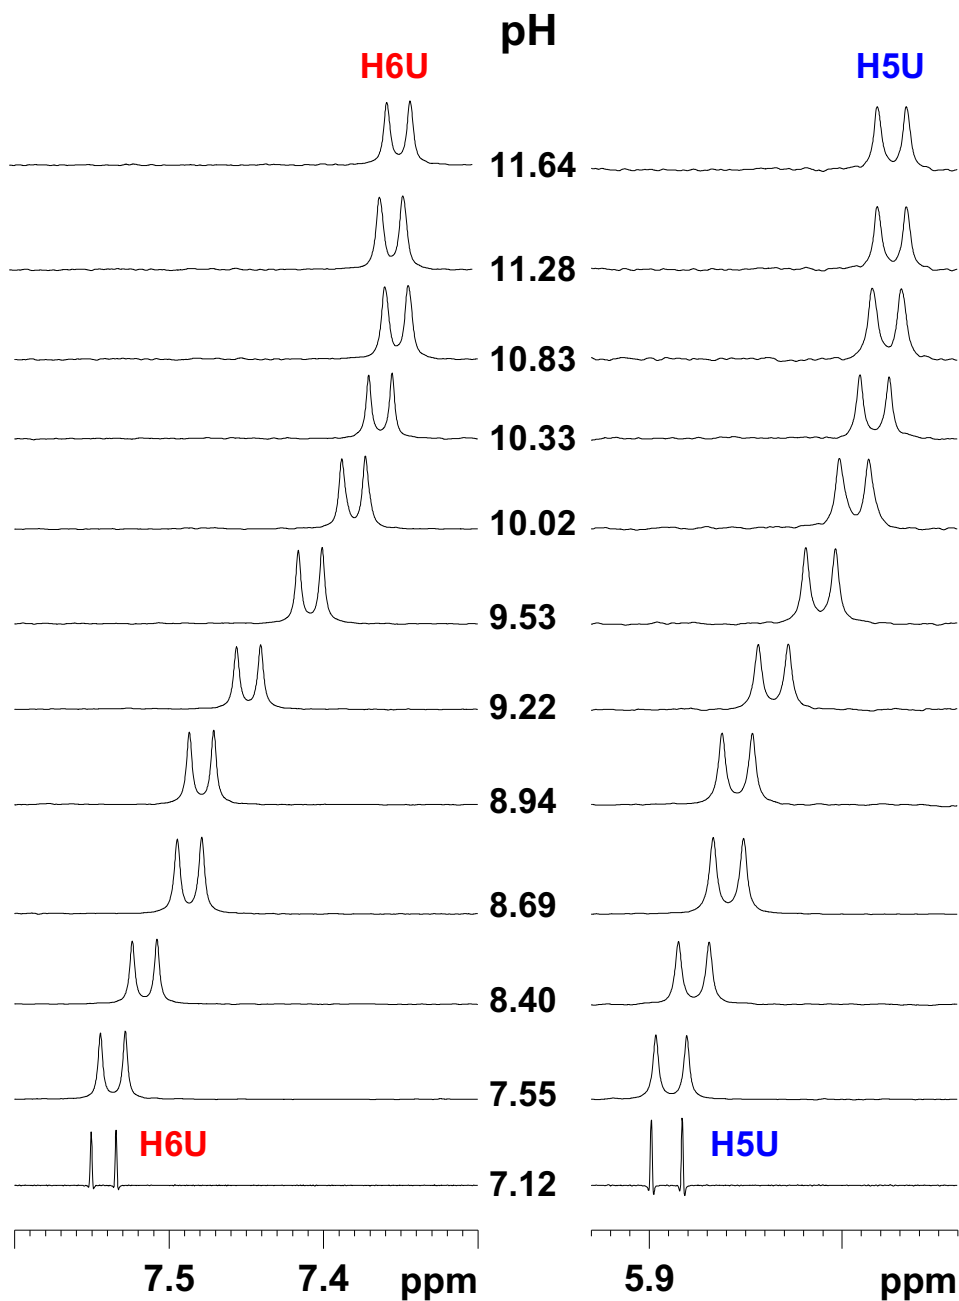

(27) pH dependent  $^1\text{H}$  chemical shift (in  $\text{D}_2\text{O}$ ) of EtpAzeUpEt azetidinium protonation (5e) at 298 K

### EtpAzeUpEt\_NH\_pH (5e)

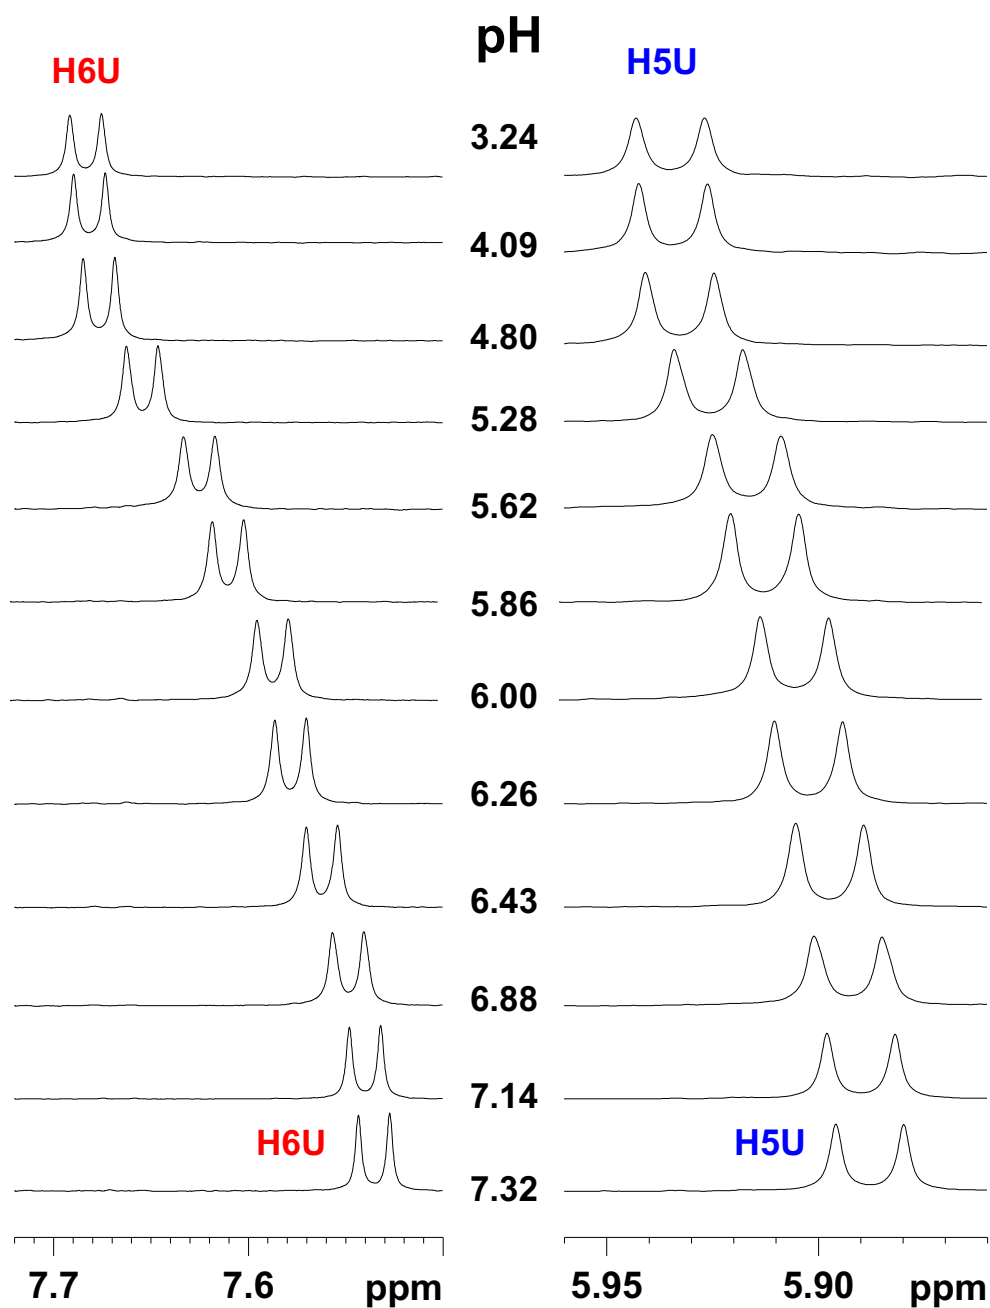

(28) pH dependent  $^1\text{H}$  chemical shift (in  $\text{D}_2\text{O}$ ) of Etp2'-aminoTpEt (6d) at 298 K

### Etp2'NH2TpEt (6d)

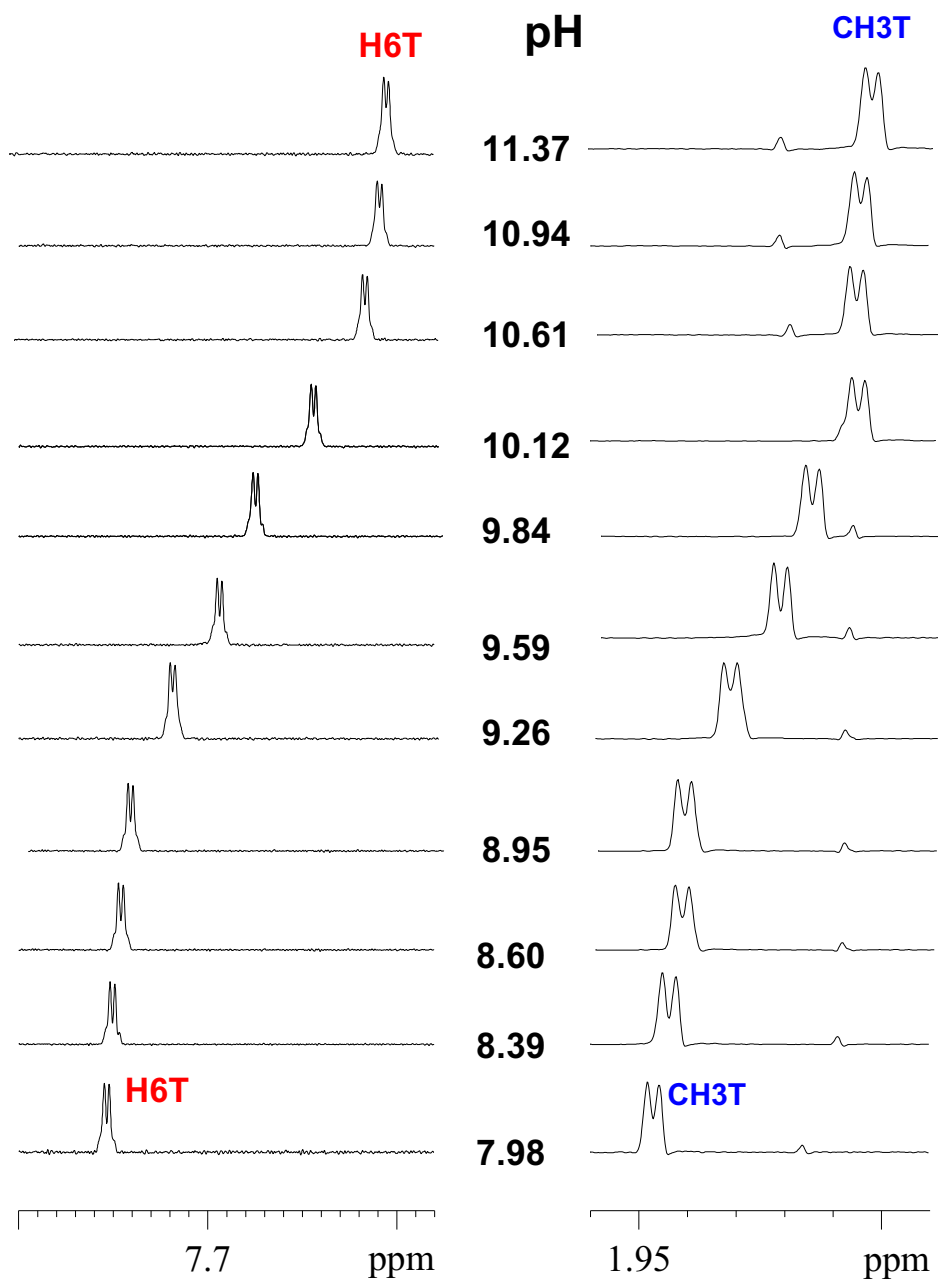

pH

(29) pH dependent  $^1\text{H}$  chemical shift (in  $\text{D}_2\text{O}$ ) of Etp2'AminoTpEt amino protonation (6d) at 298 K

## Etp(2'NH<sub>2</sub>)-TpEt\_NH<sub>2</sub>\_pH (6d)

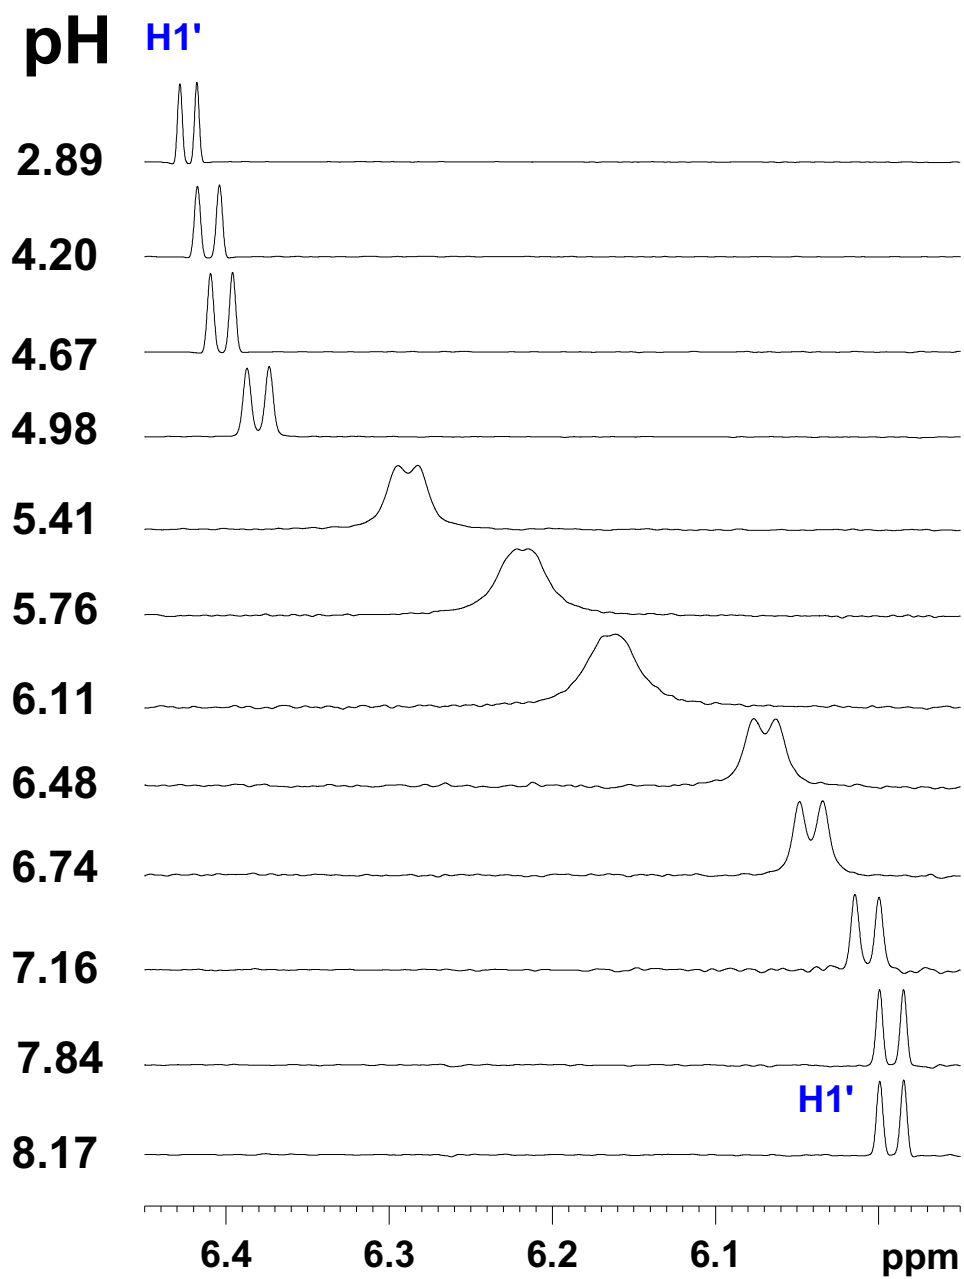

(30) pH dependent  $^1\text{H}$  chemical shift (in  $\text{D}_2\text{O}$ ) of AzeCpEt (5h) at 298 K

## 5'OH-AzeCpEt\_pH (5h)

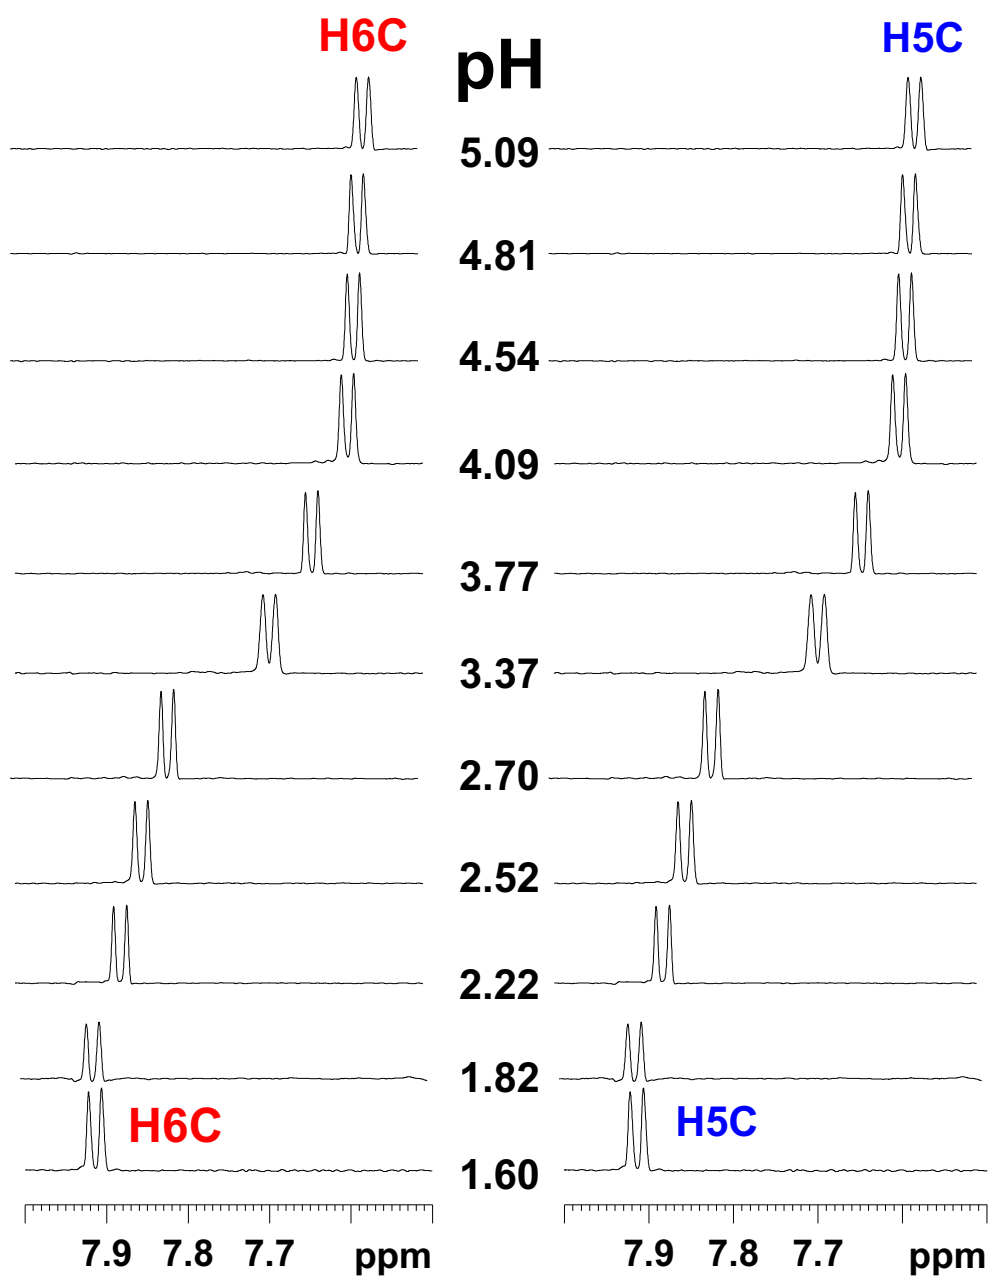



(31) pH dependent  $^1\text{H}$  chemical shift (in  $\text{D}_2\text{O}$ ) of AzeCpEt azetidine protonation (5h) at 298 K

### 5'OH-AzeCpEt\_NH\_pH (5h)

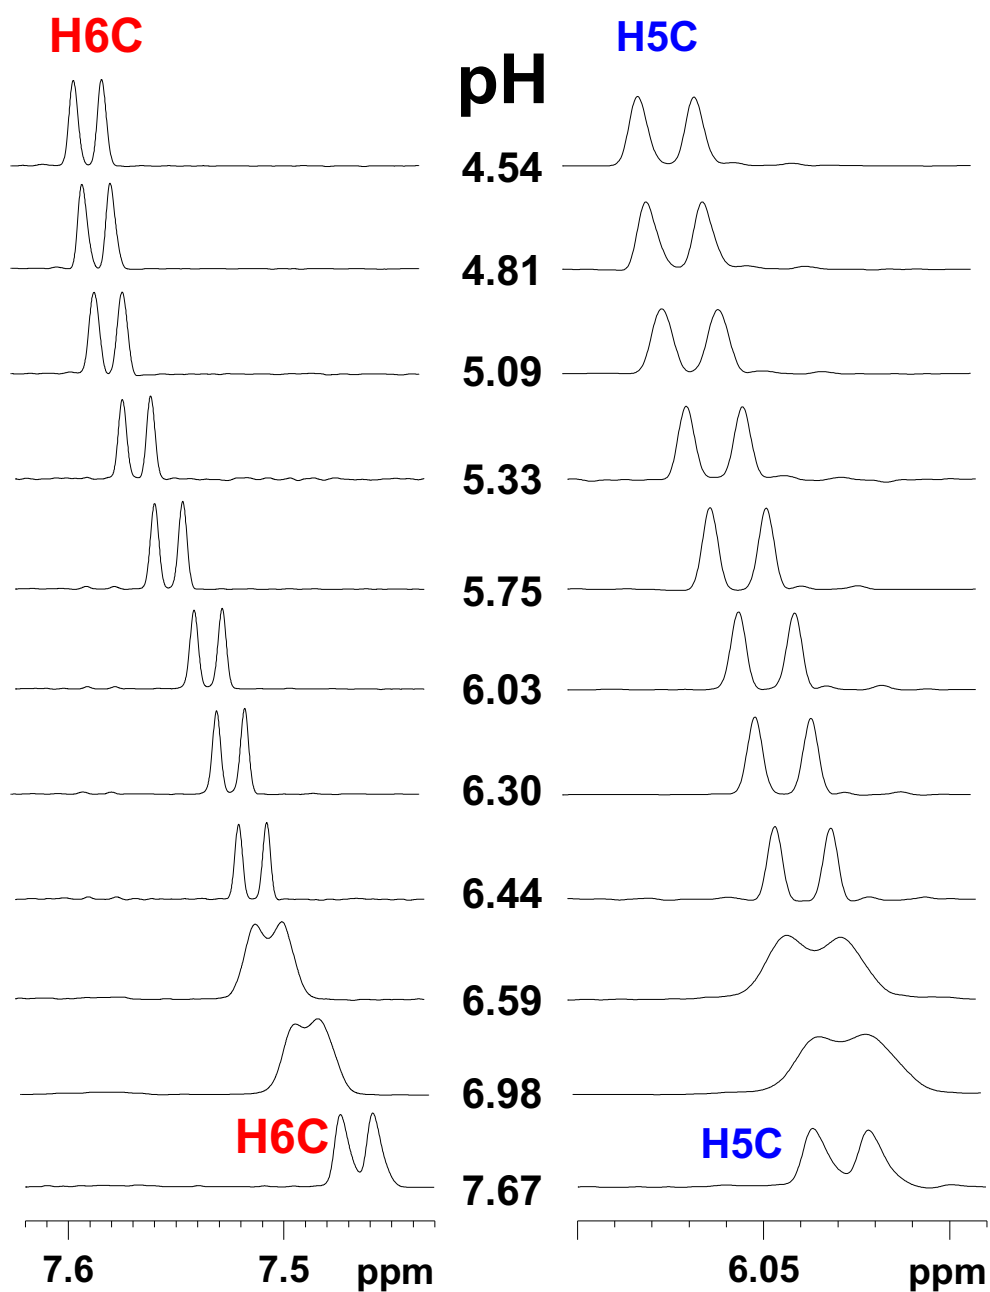

(32) pH dependent  $^1\text{H}$  chemical shift (in  $\text{D}_2\text{O}$ ) of AzeTpEt (5i) at 298 K

### 5'-OH-AzeTpEt\_pH (5i)

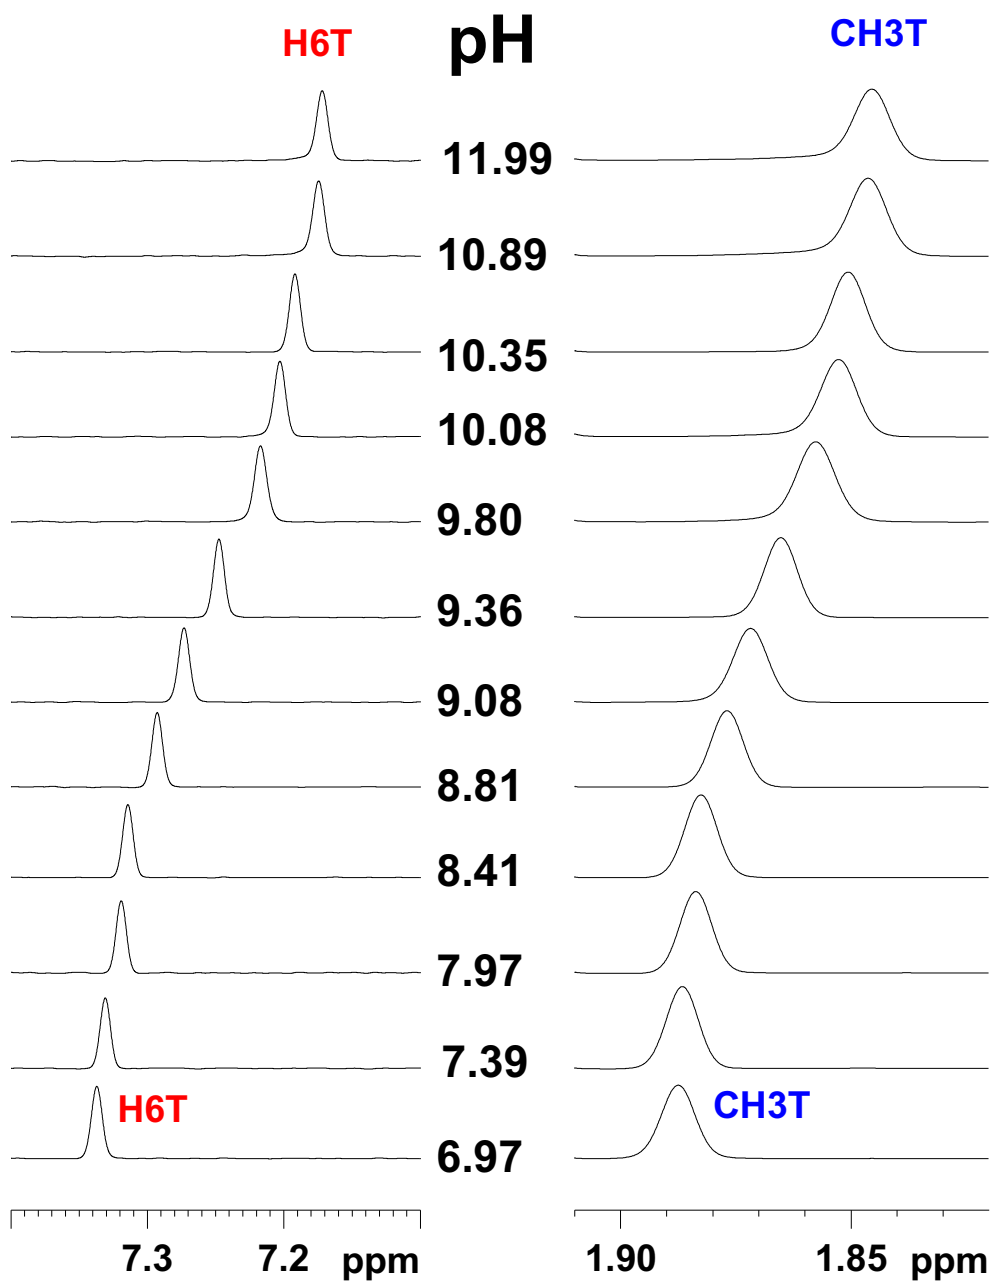

(33) pH dependent  $^1\text{H}$  chemical shift (in  $\text{D}_2\text{O}$ ) of AzeTpEt azetidine protonation (5i) at 298 K

### 5'-OH-AzeTpEt\_NH\_pH (5i)

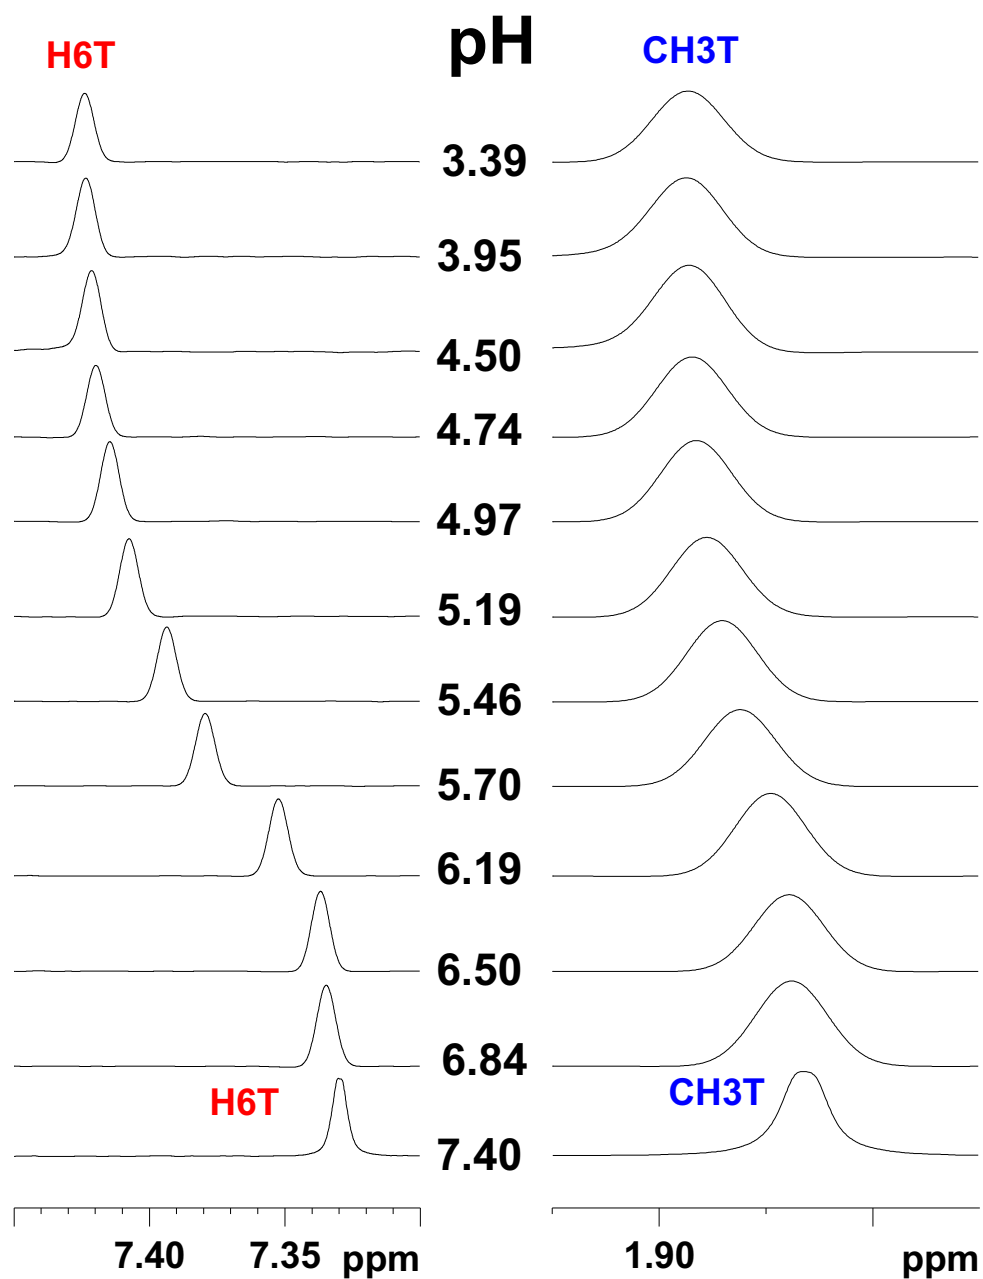

(34) pH dependent  $^1\text{H}$  chemical shift (in  $\text{D}_2\text{O}$ ) of AzeUpEt (5j) at 298 K

### 5'OH-AzeUpEt\_pH (5j)

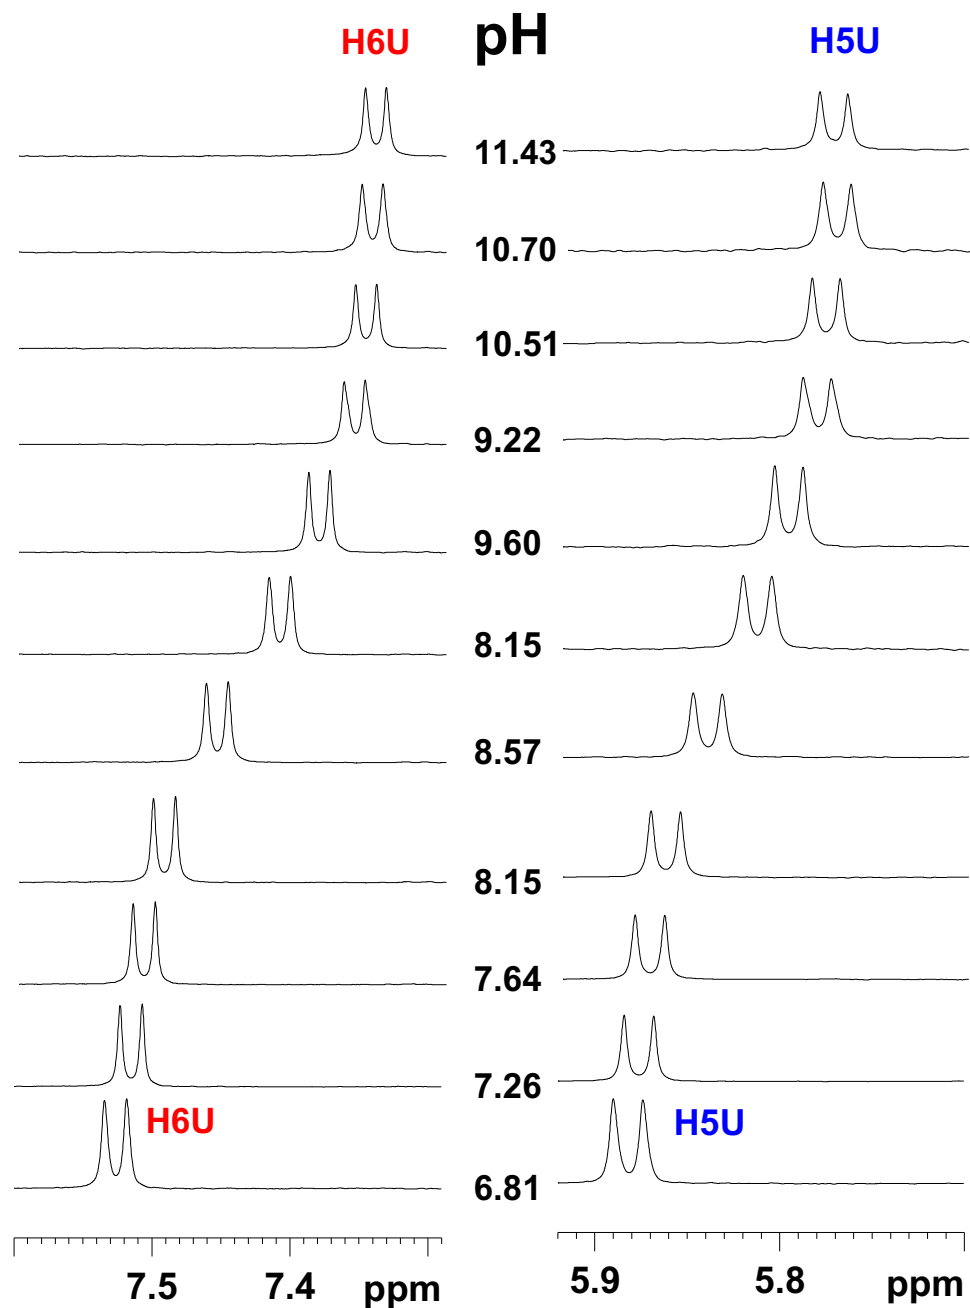

(35) pH dependent  $^1\text{H}$  chemical shift (in  $\text{D}_2\text{O}$ ) of AzeTpEt azetidine protonation (5j) at 298 K

## 5'-OH-AzeUpEt\_NH\_pH (5j)

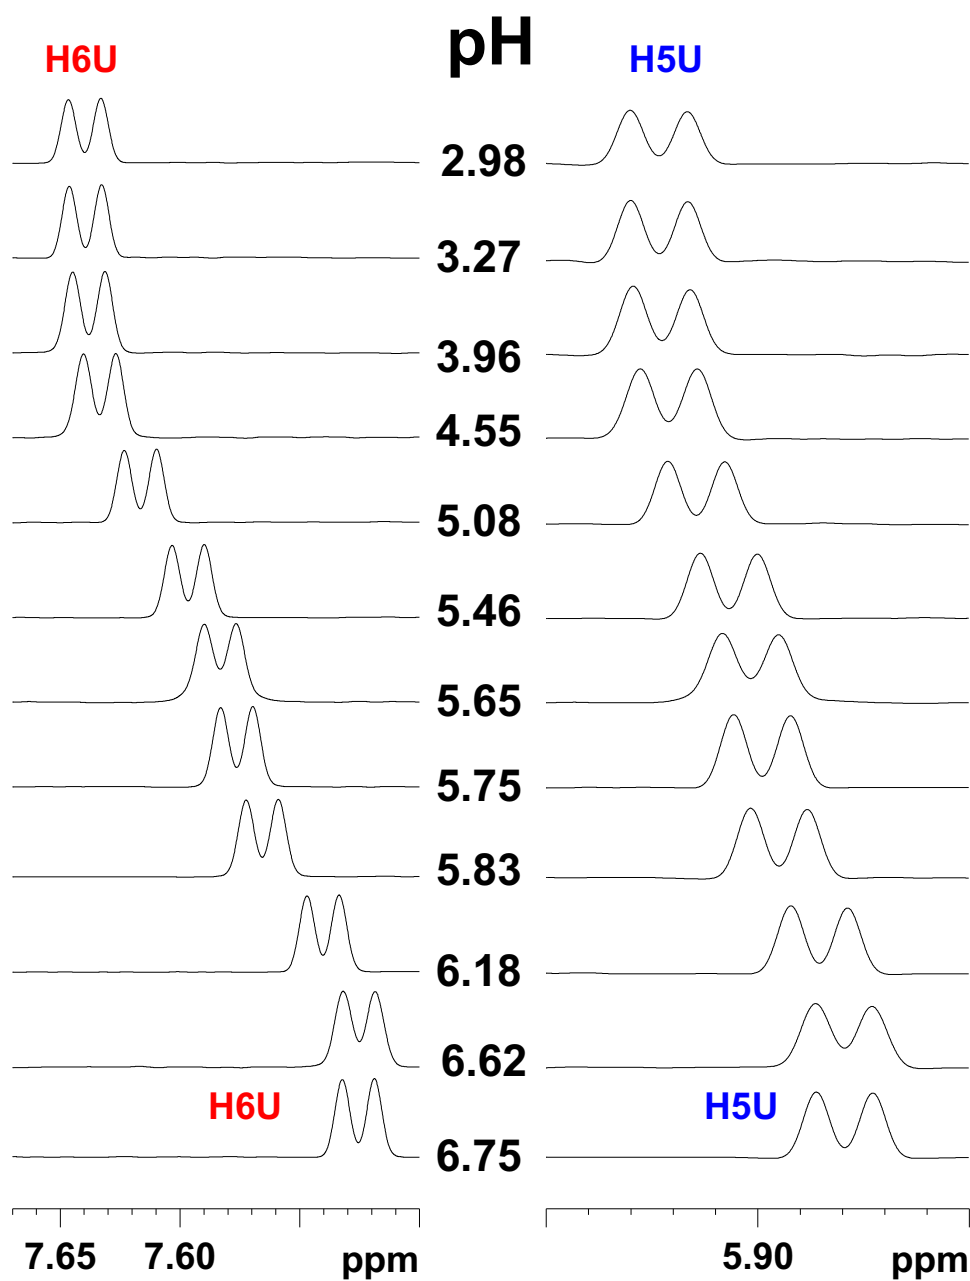

(36) pH dependent  $^1\text{H}$  chemical shift (in  $\text{D}_2\text{O}$ ) of Etp2'NH<sub>2</sub>CpEt azetidine protonation (6c) at 298K

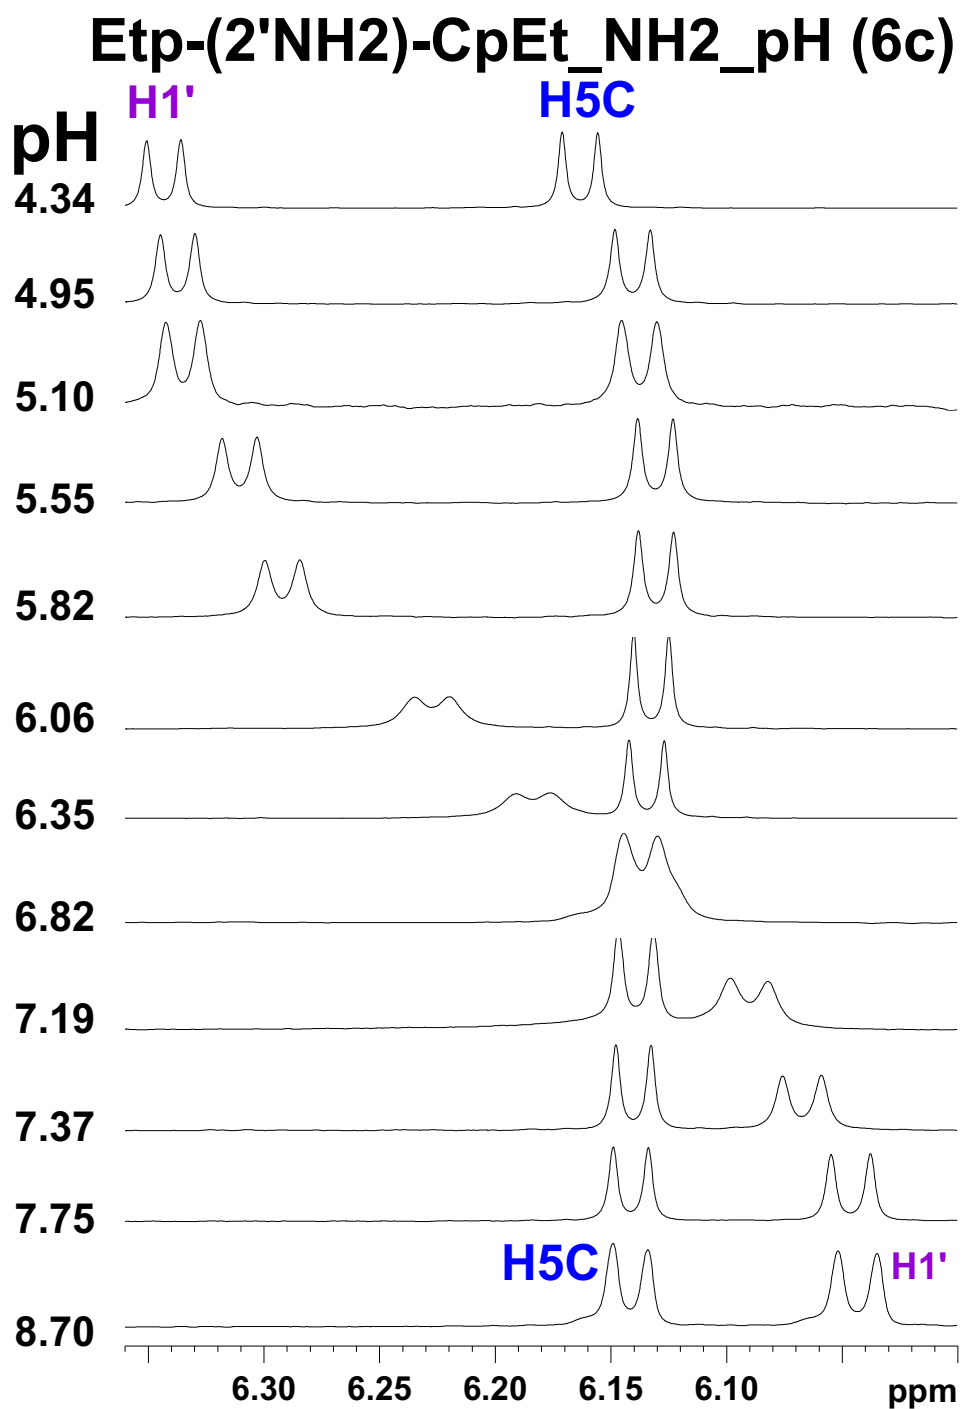

(37) pH dependent  $^1\text{H}$  chemical shift (in  $\text{D}_2\text{O}$ ) of Etp2'NH<sub>2</sub>CpEt (6c) at 298 K

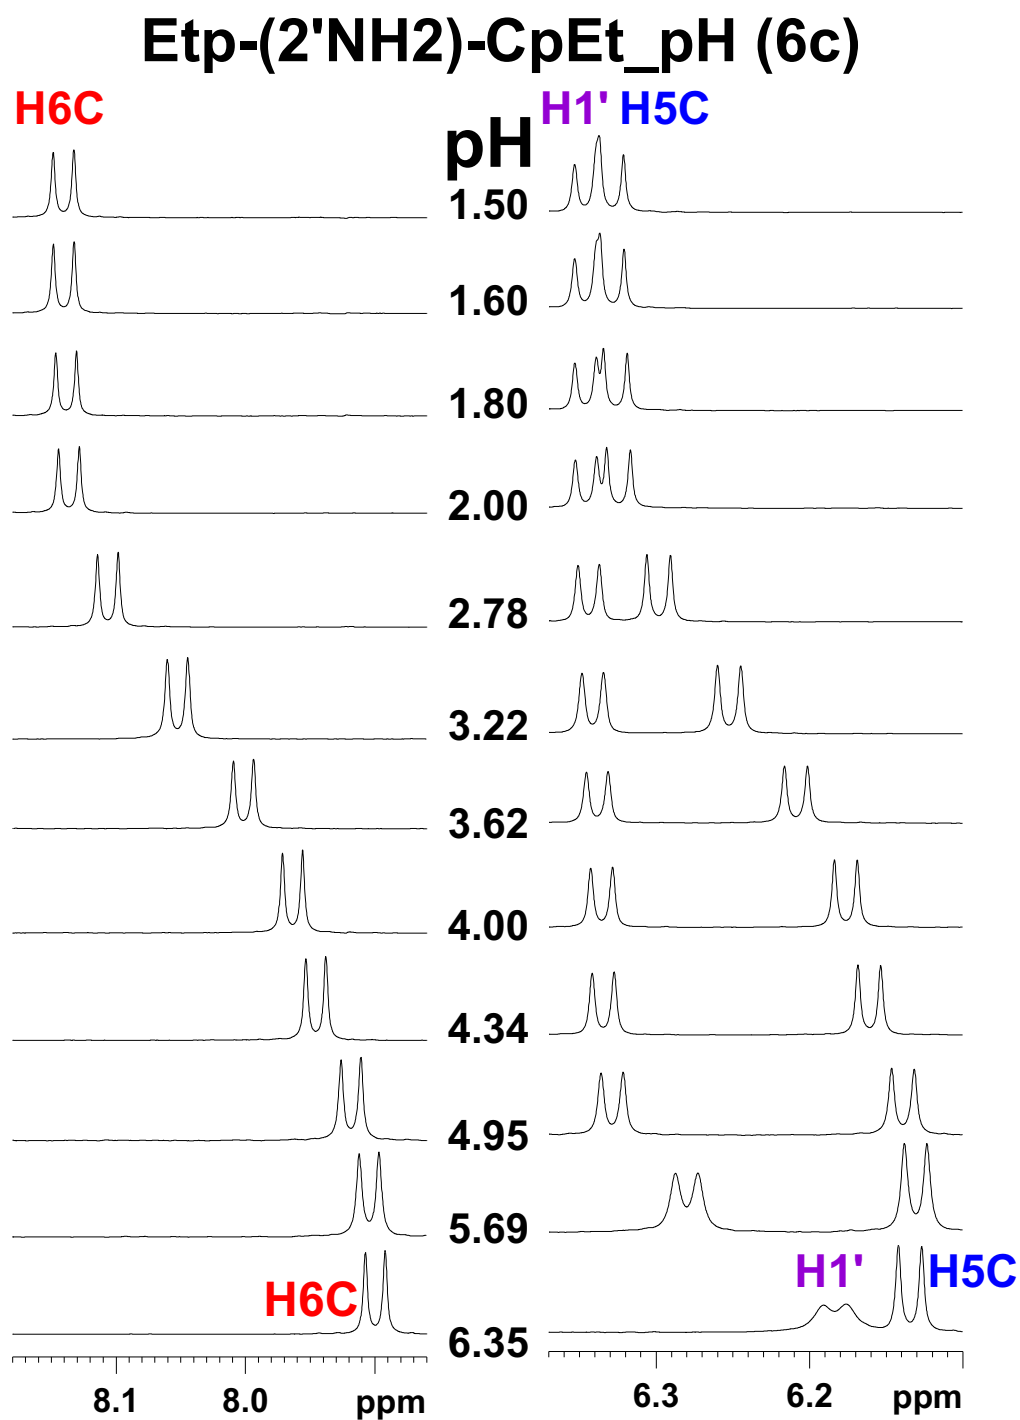

(38) pH dependent  $^1\text{H}$  chemical shift (in  $\text{D}_2\text{O}$ ) of 2'- $\text{NH}_2\text{TpEt}$  (6i) at 298 K

### 5'OH-(2'NH<sub>2</sub>)-TpEt\_pH (6i)

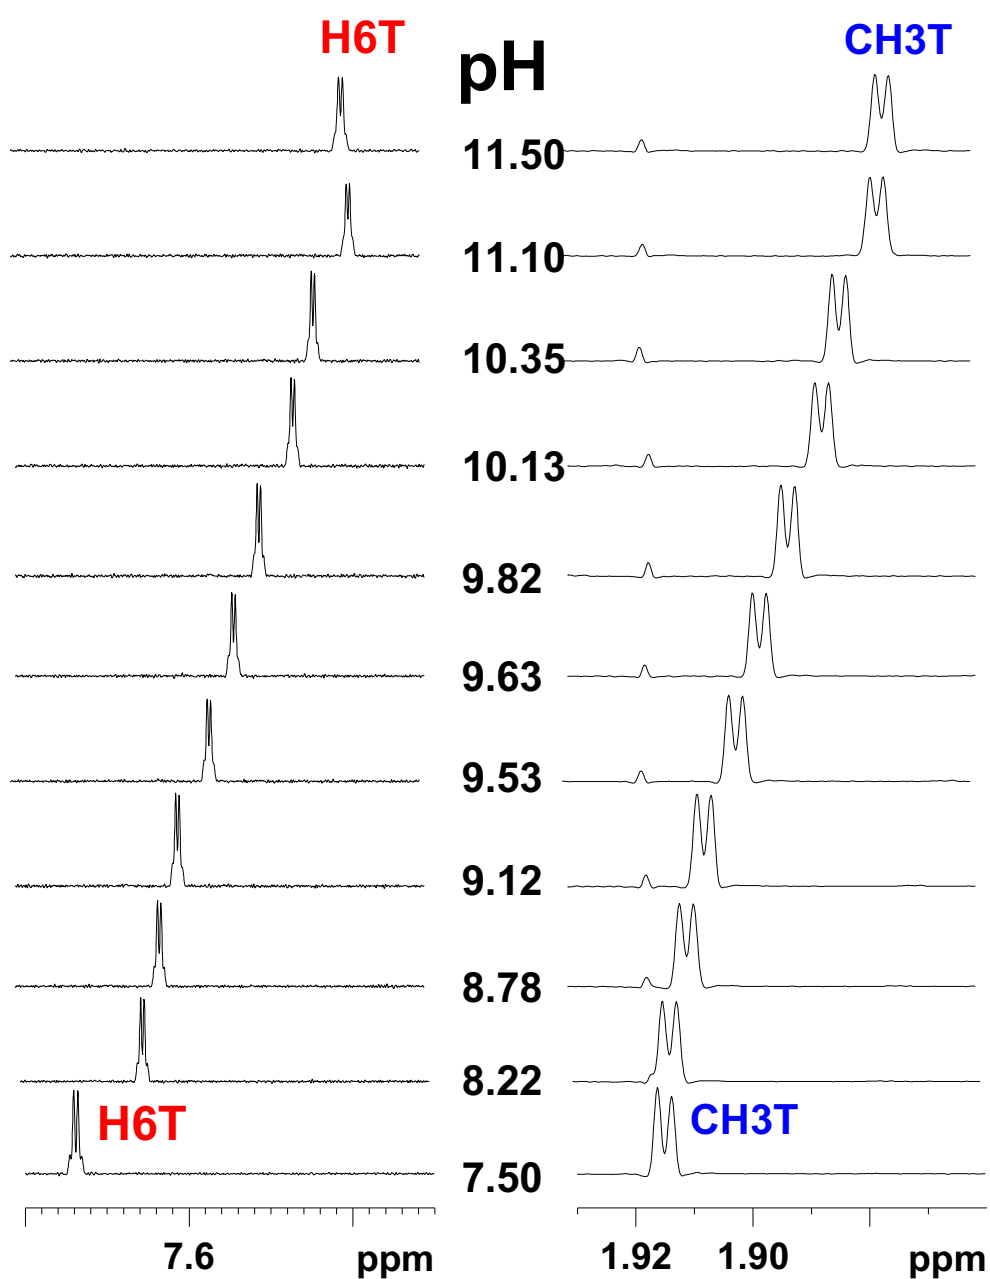



(39) pH dependent  $^1\text{H}$  chemical shift (in  $\text{D}_2\text{O}$ ) of 2'- $\text{NH}_2$ TpEt amino protonation (6i) at 298 K

### 5'-OH-(2'- $\text{NH}_2$ )-TpEt\_NH2\_pH (6i)

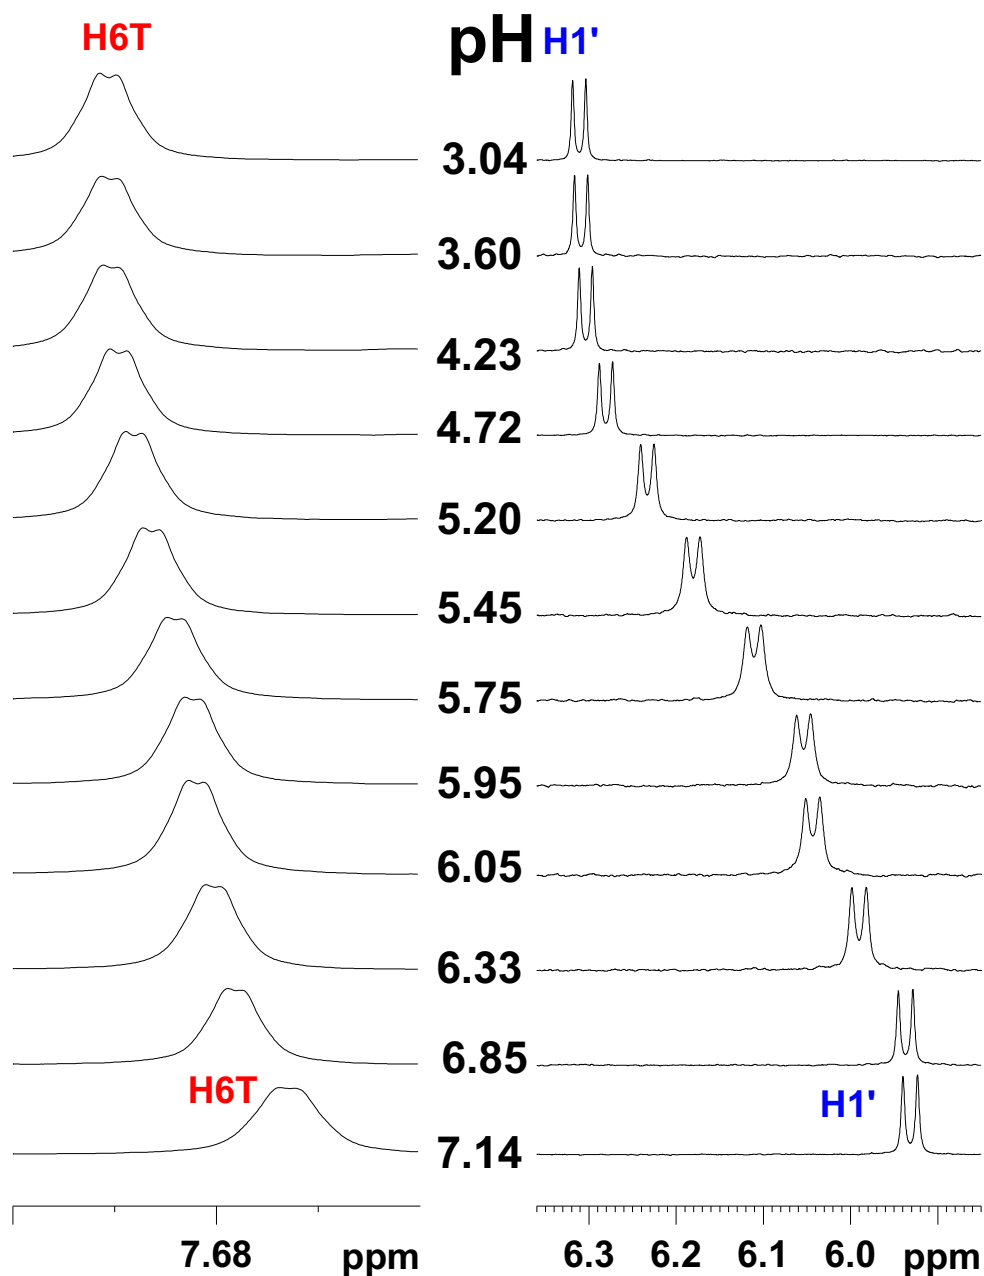

Figure S2. Sigmoidal curves of pH metric titrations of the 2'-OMe analogs (2a – 2i)

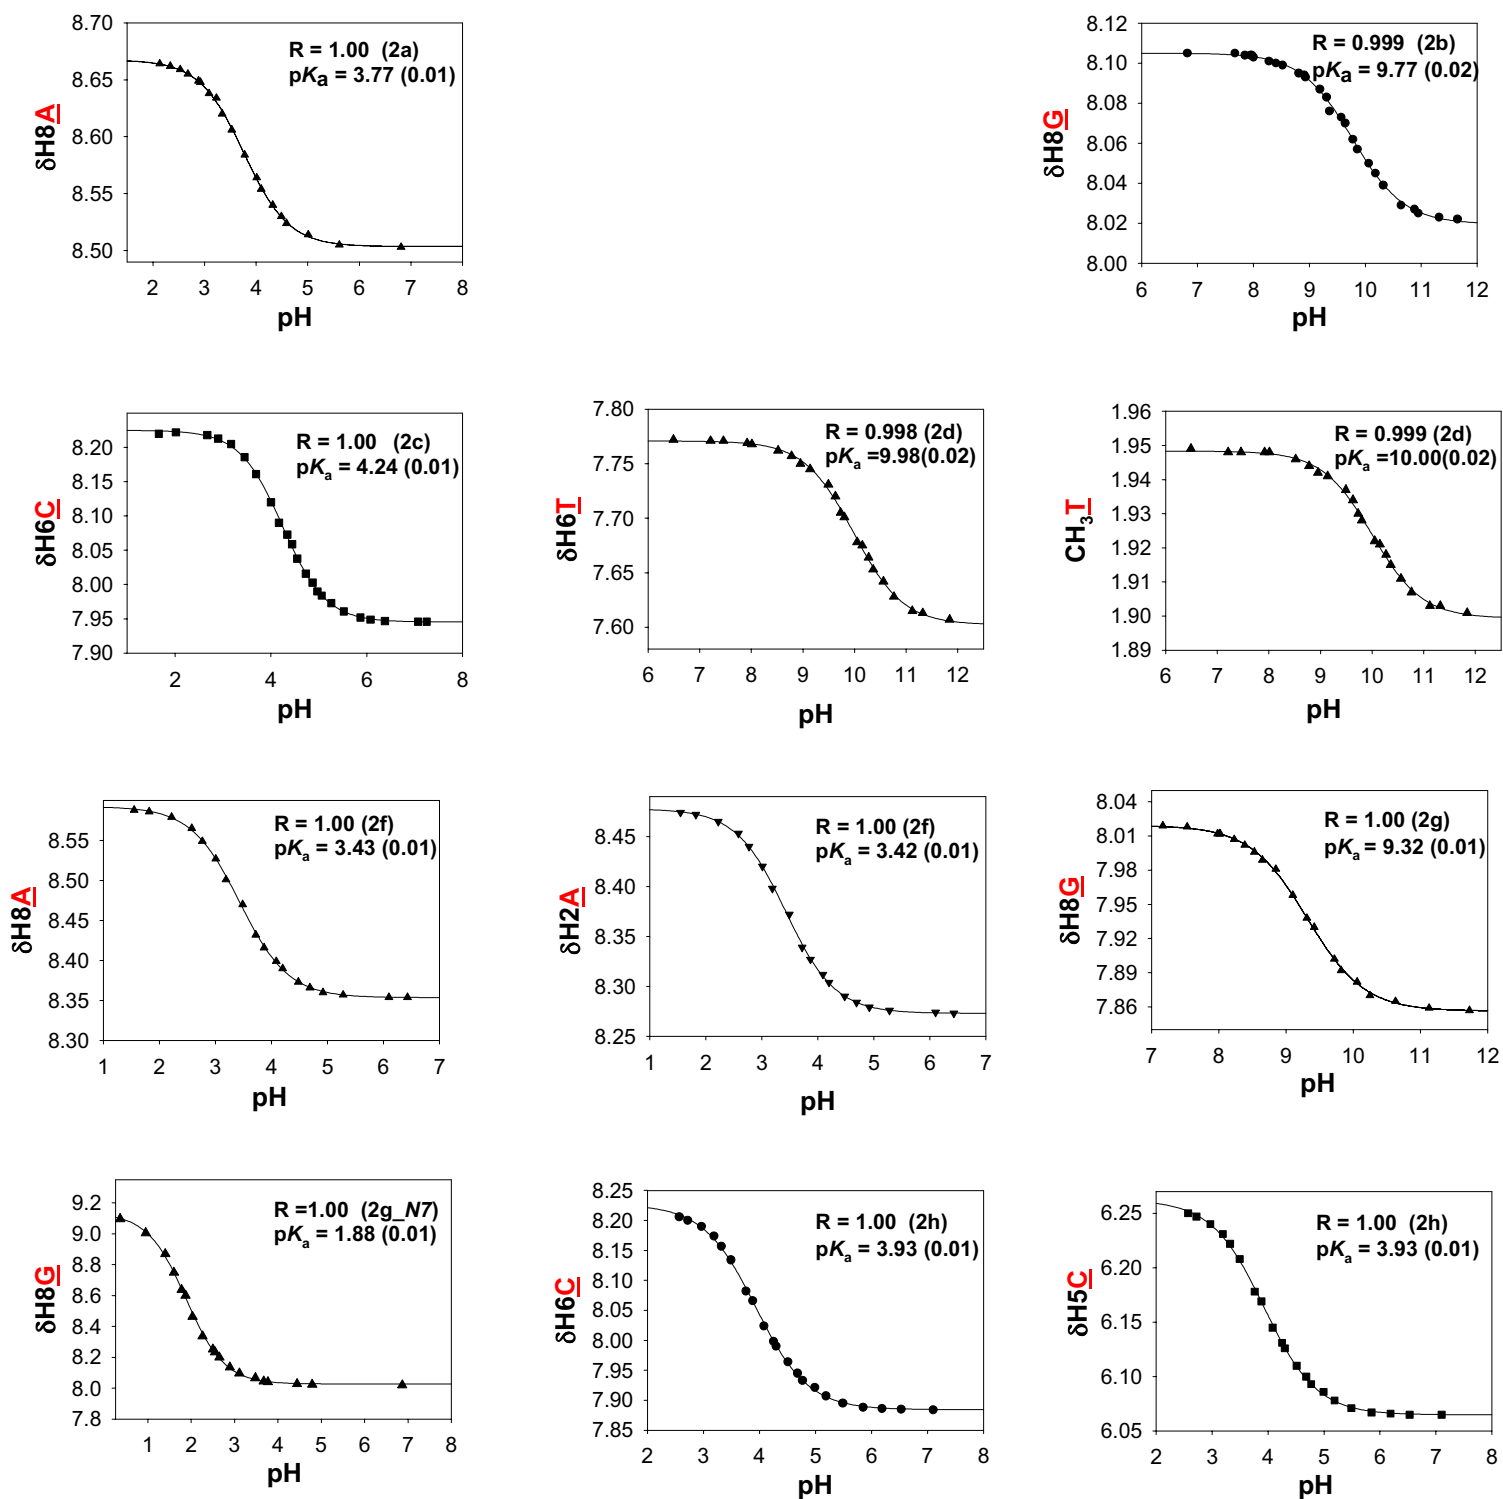

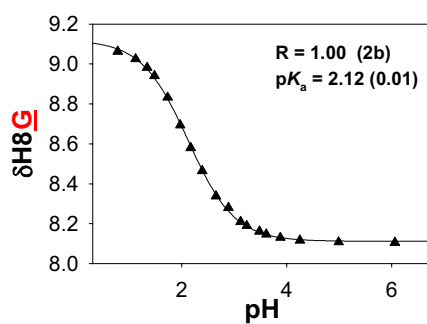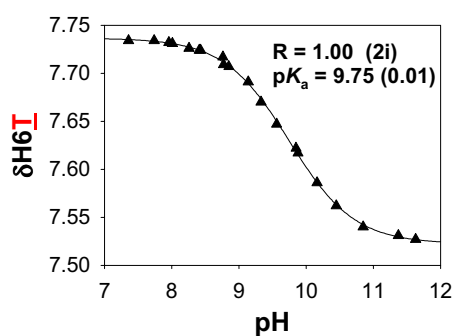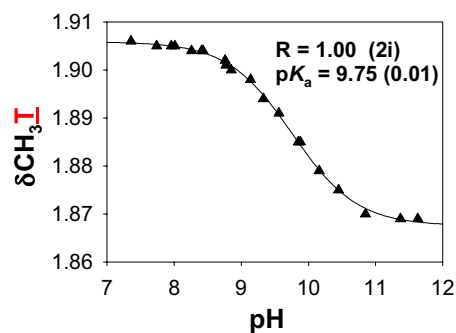

### Sigmoidal curves of pH metric titrations of the oxetane analogs (4a – 4j)

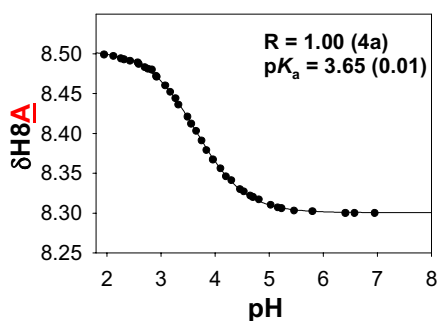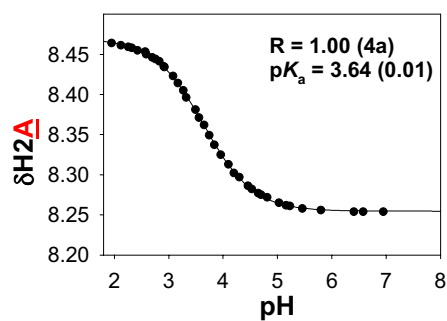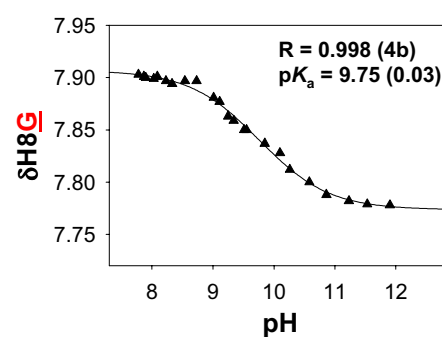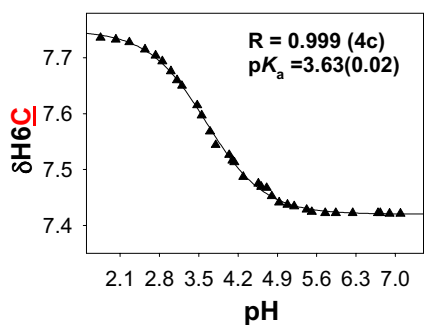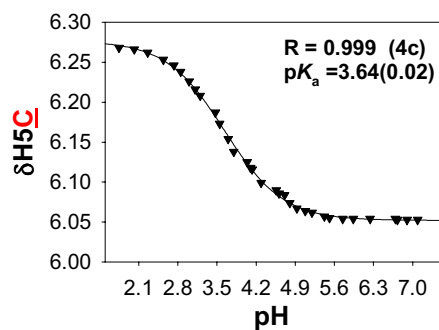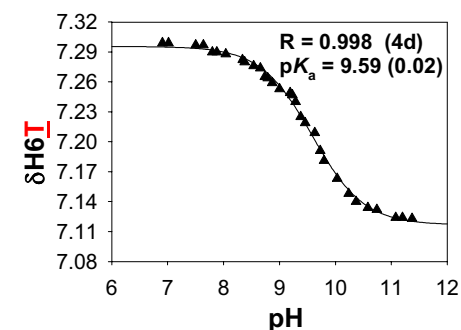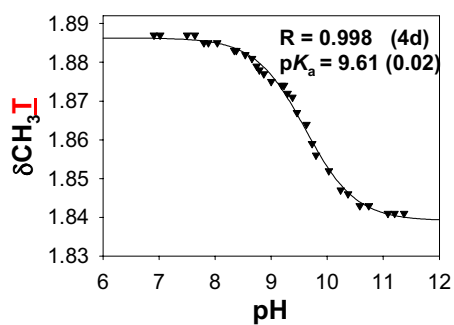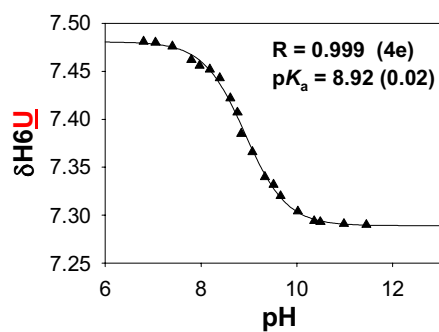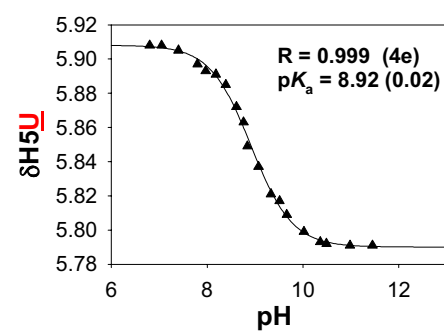

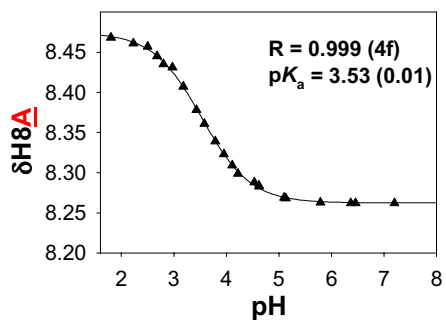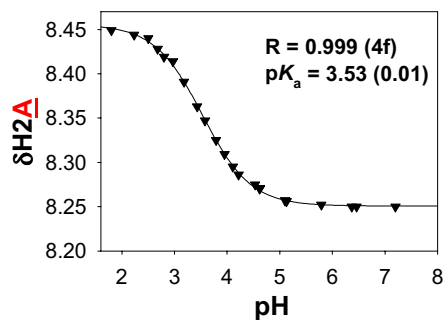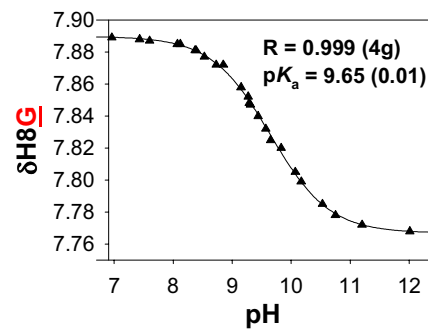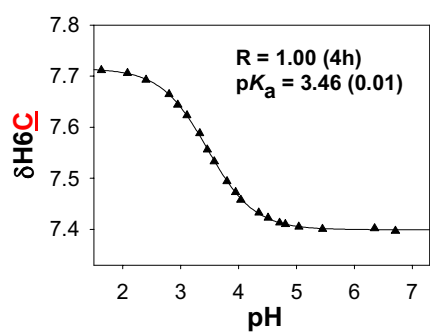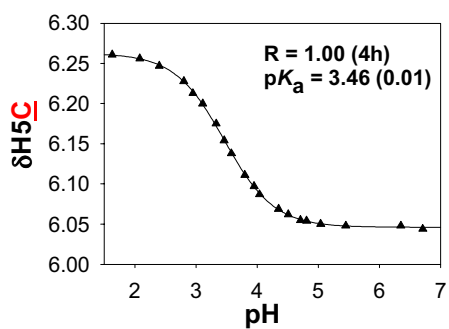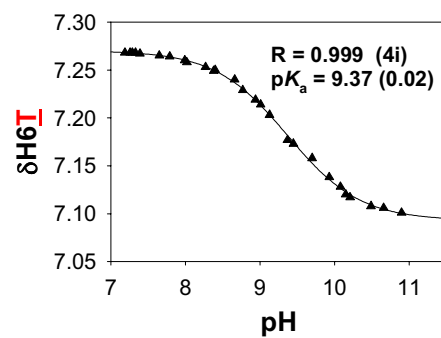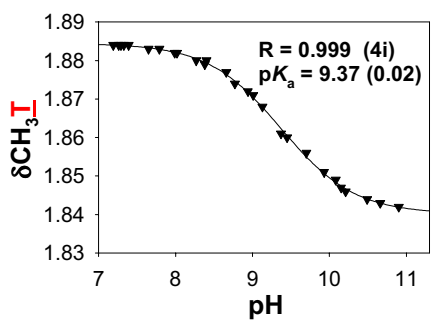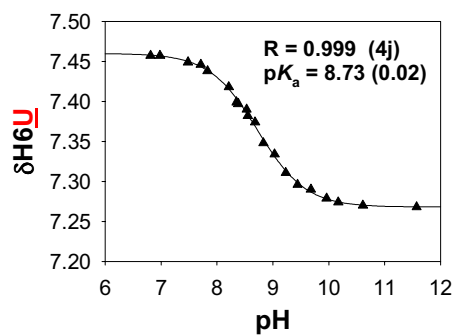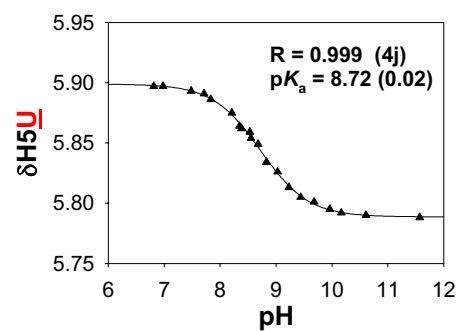

Sigmoidal curves of pH metric titrations of the deoxy-, ribo- and oxetane G analogs (N7 pK<sub>a</sub>)

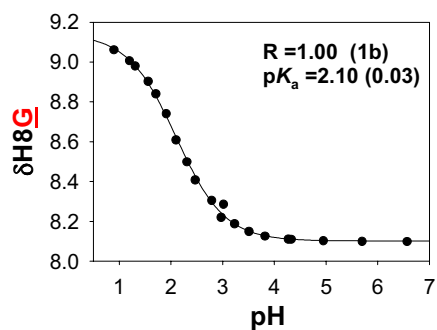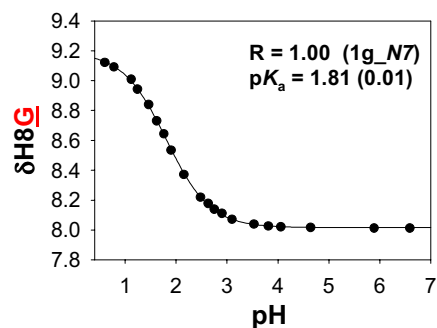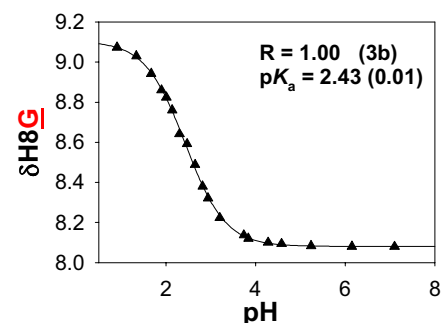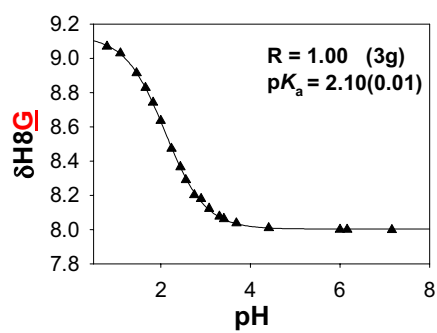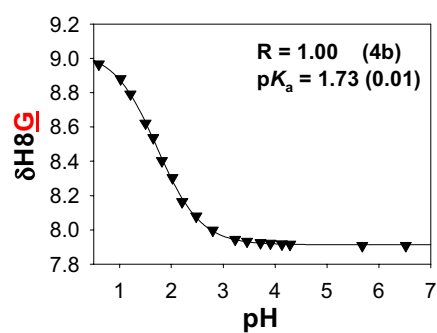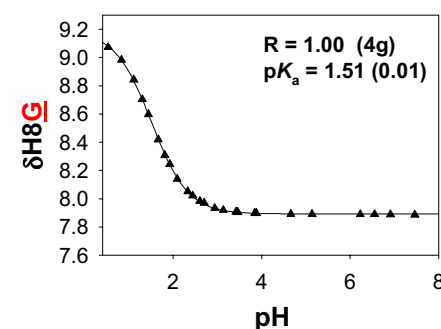

Sigmoidal curves of pH metric titrations of the (N3/N-azetidine/N-amino) of the azetidine and 2'-amino analogs

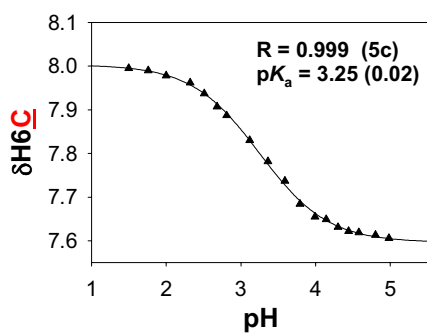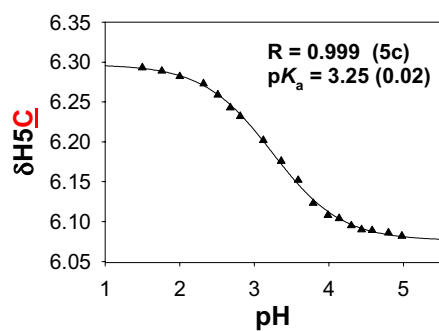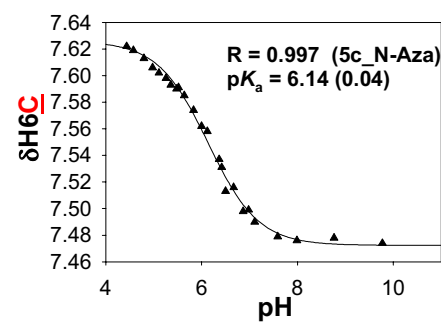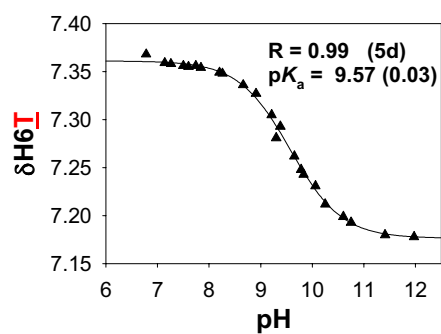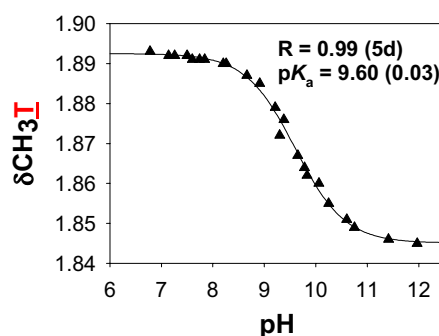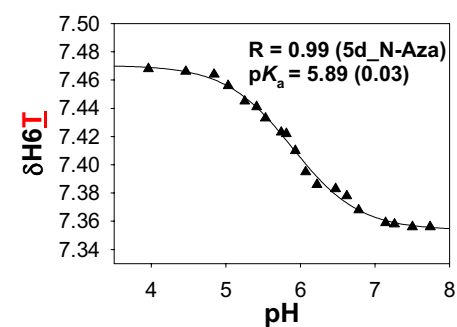

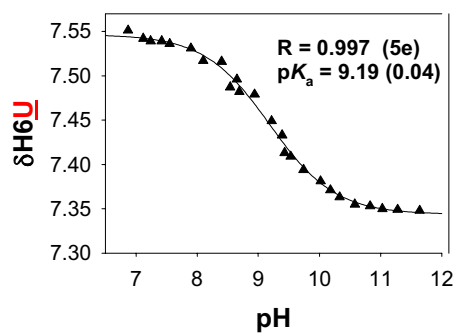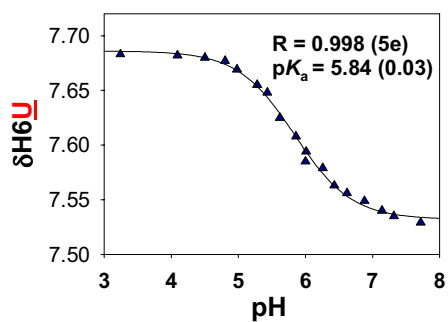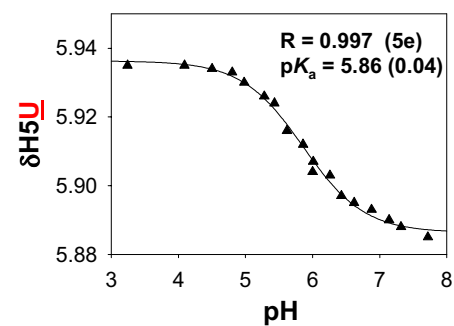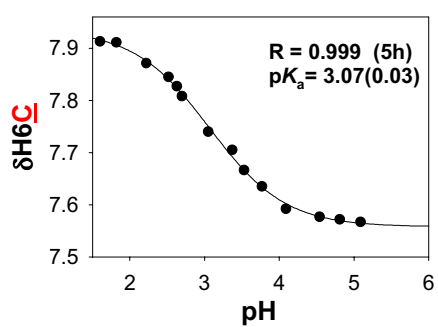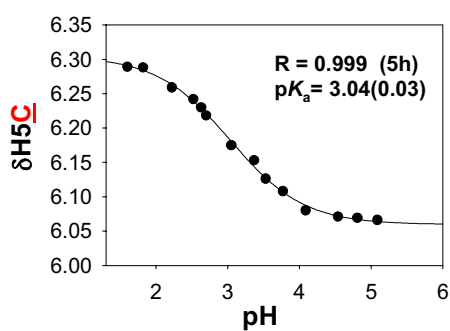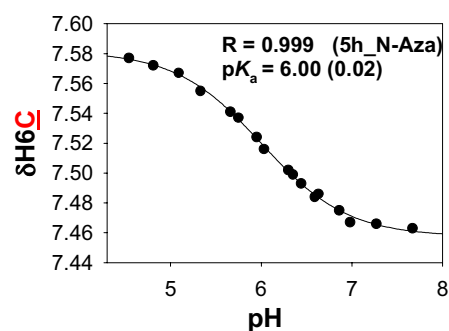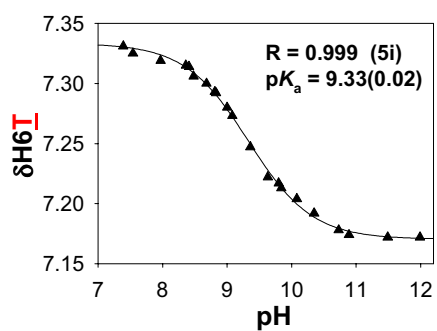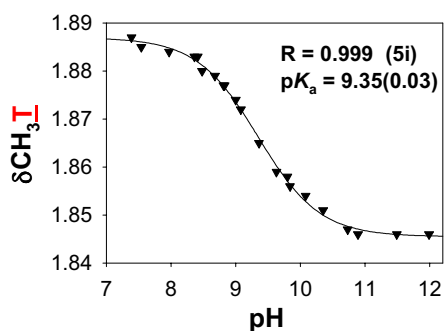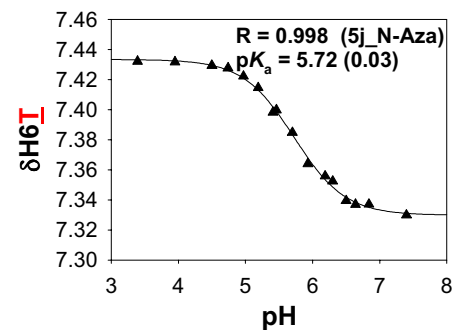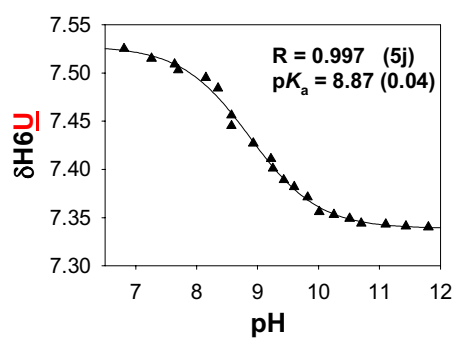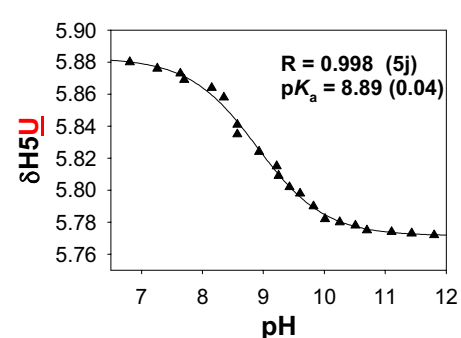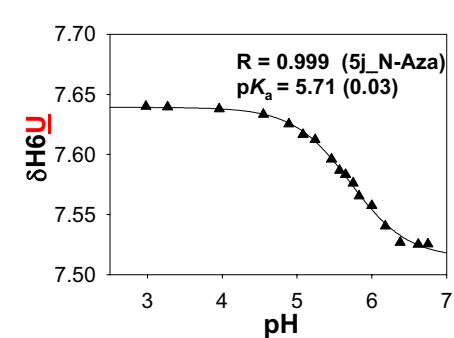

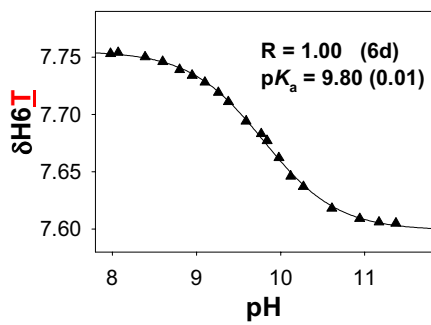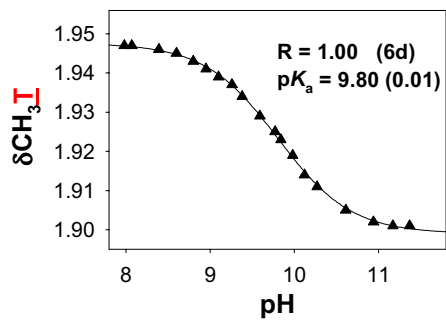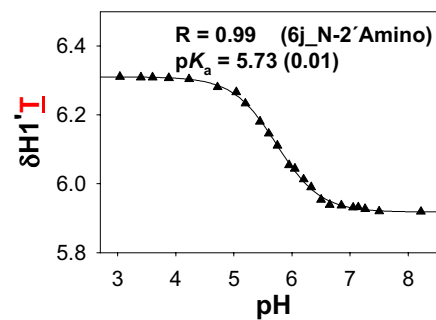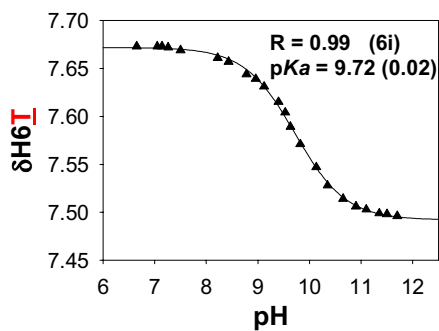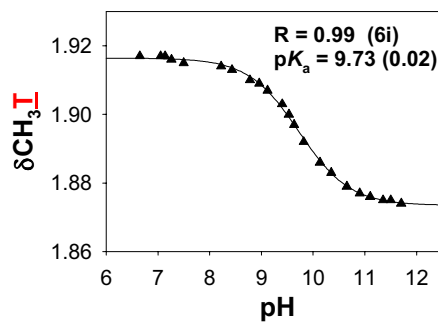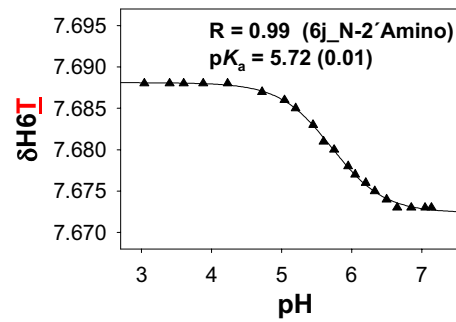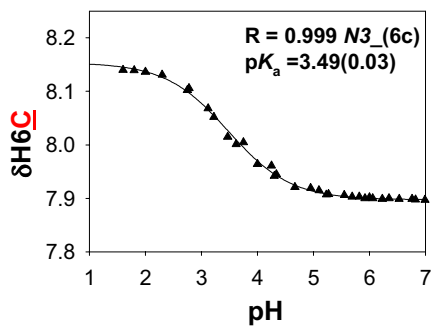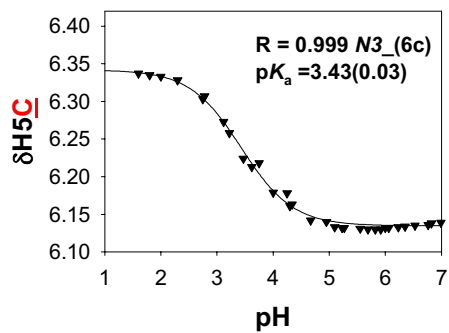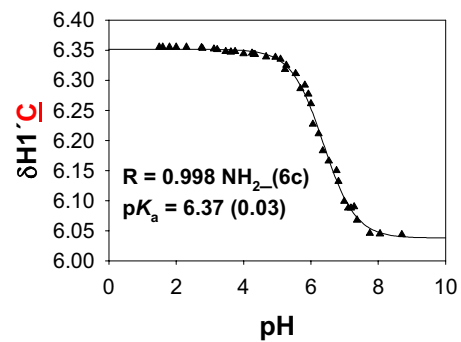

Figure S3. Hill plots: oxetane analogs [4a – 4j] (series 4 in Table 1)

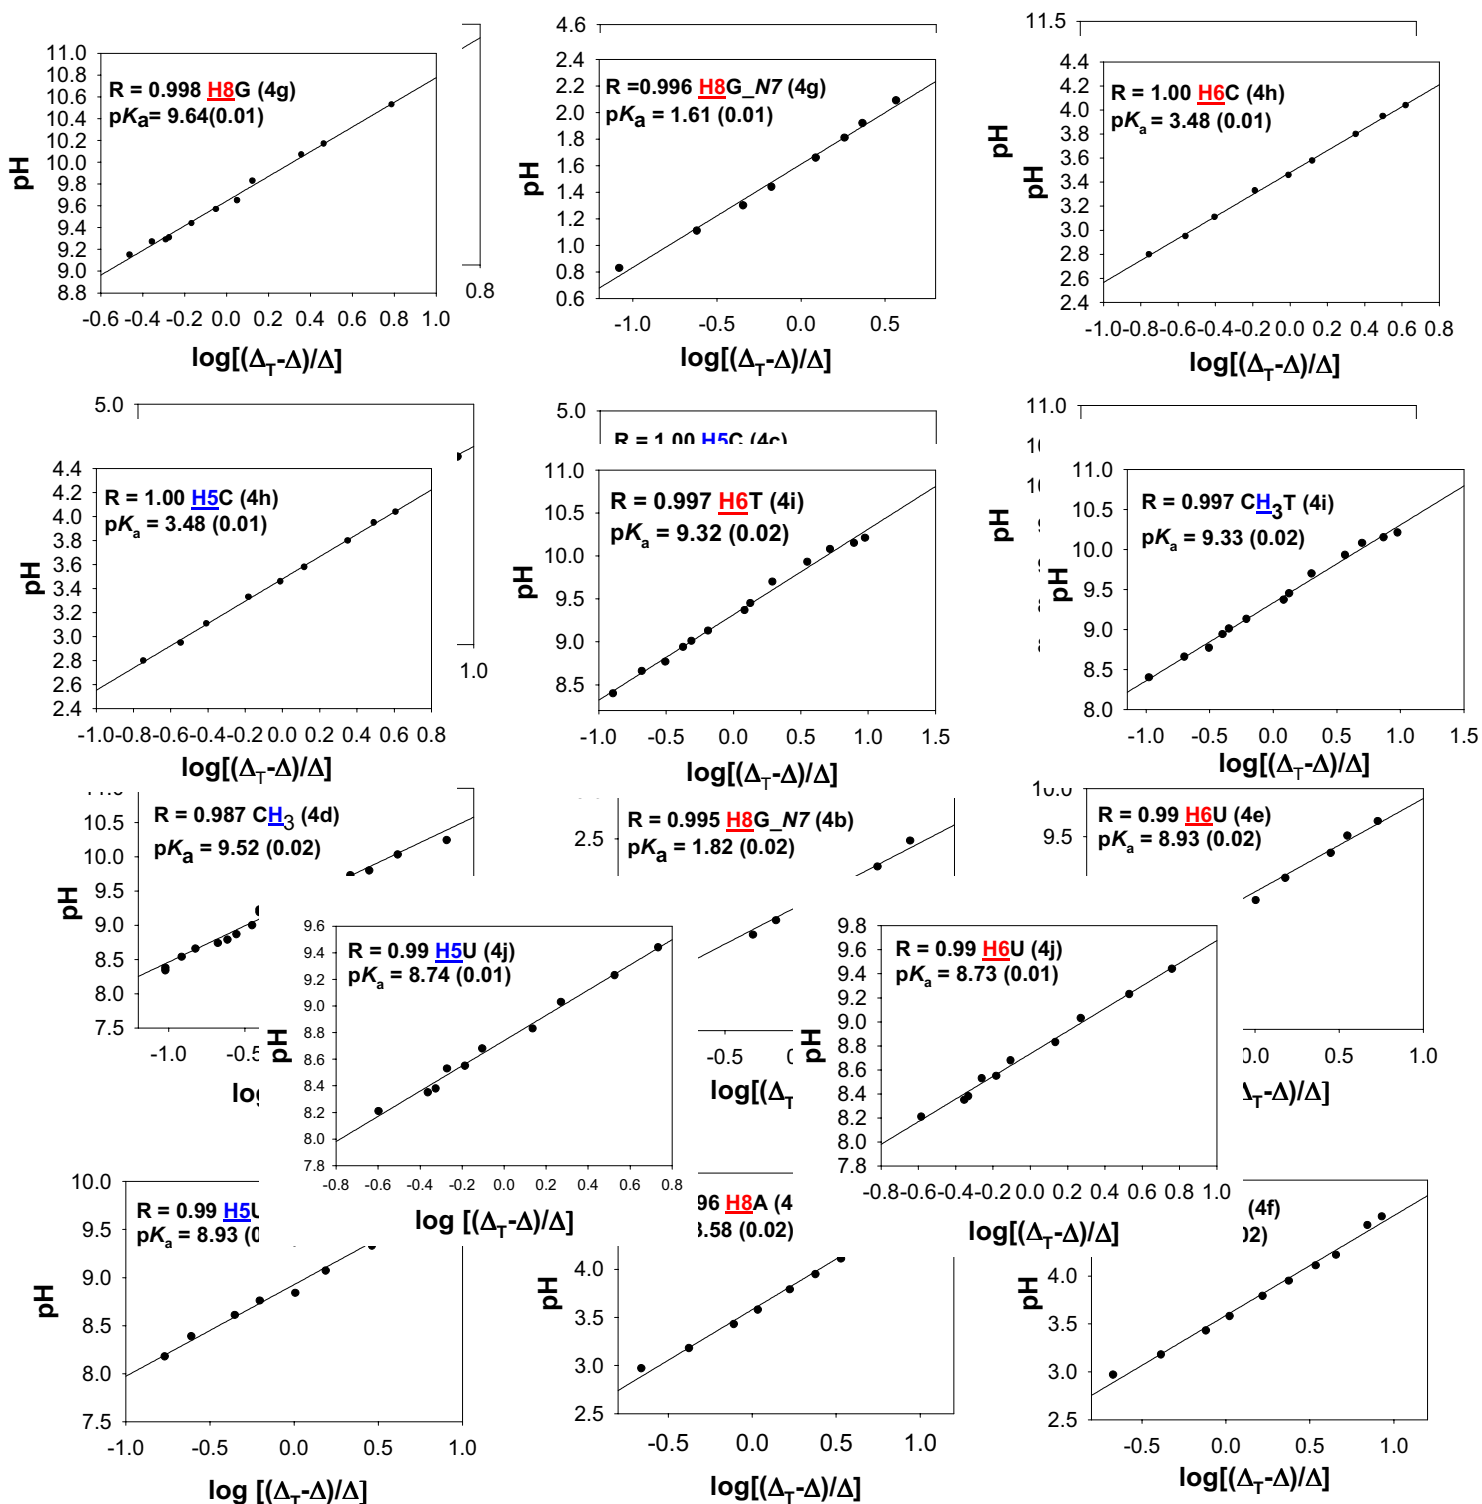



## Hill plots: 2'-OMe analogs [2a–2i] (series 2 in Table 1)

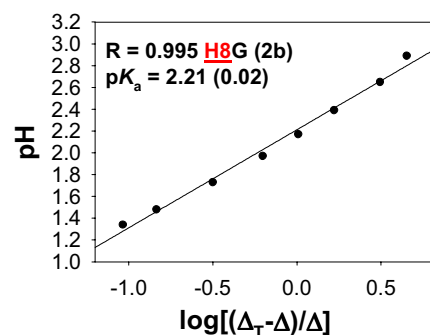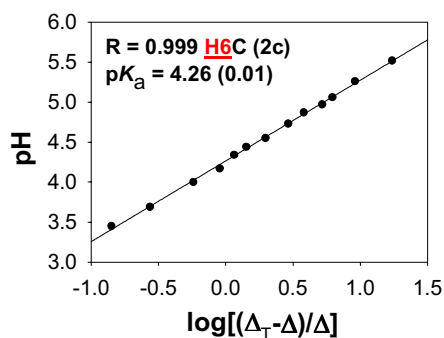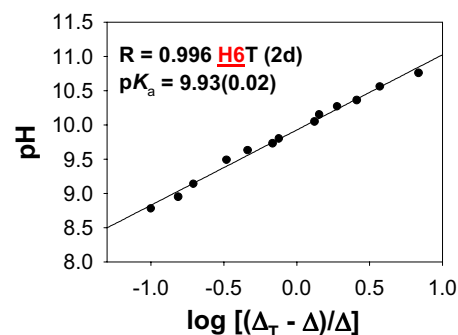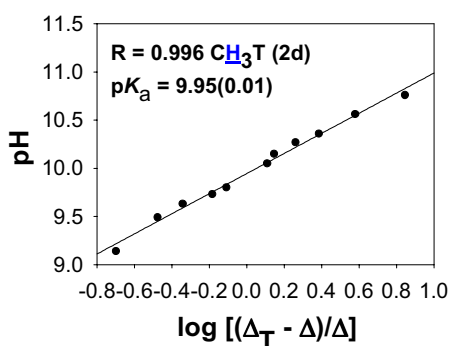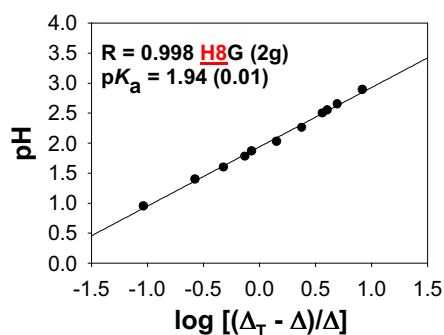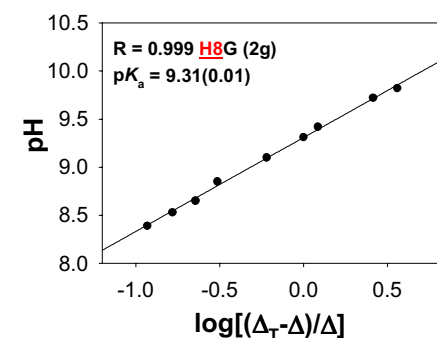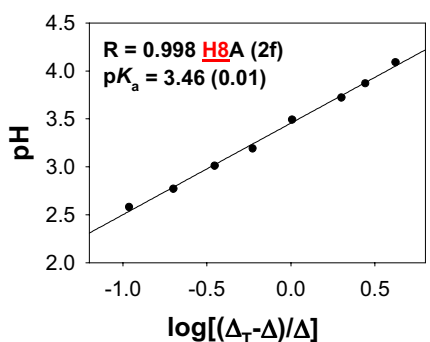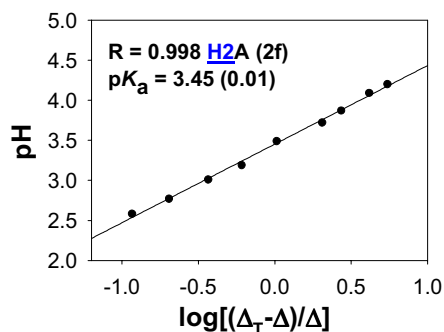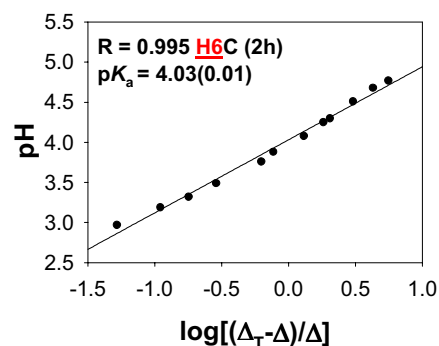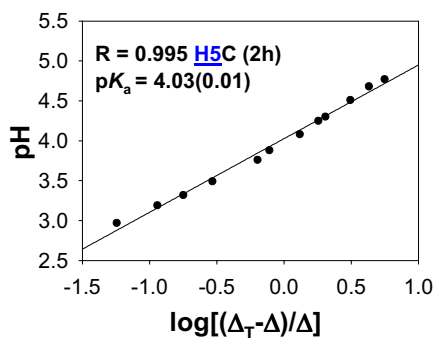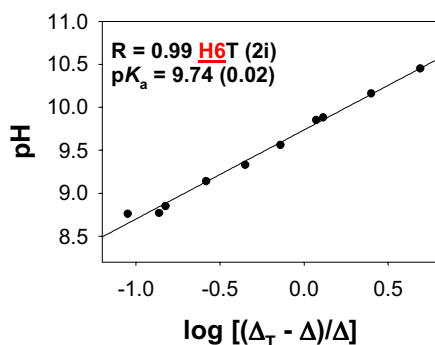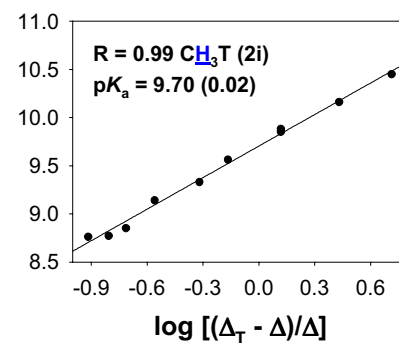

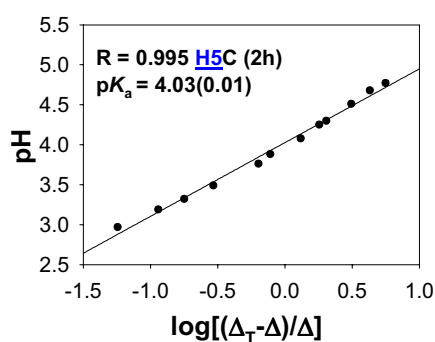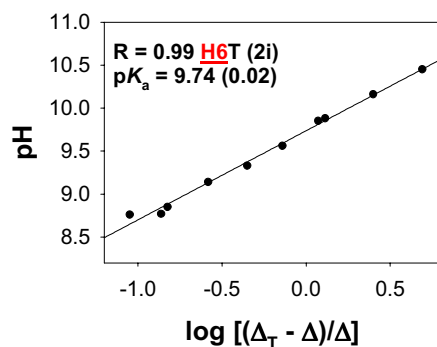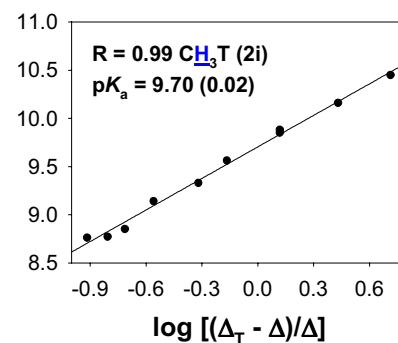

**Hill Plots: azetidine and 2'-amino analogs [5c – 6i] (series 5 of Table 1)**

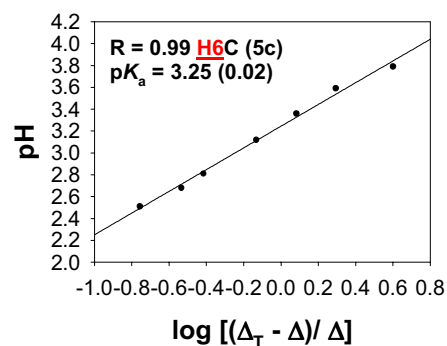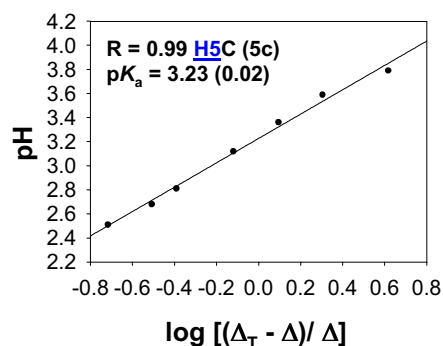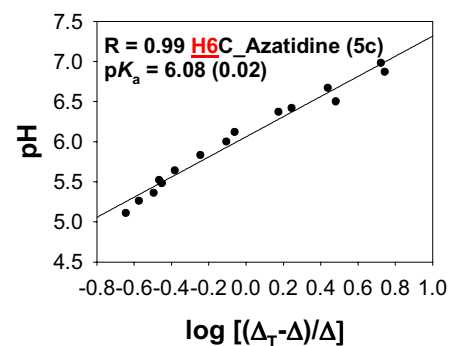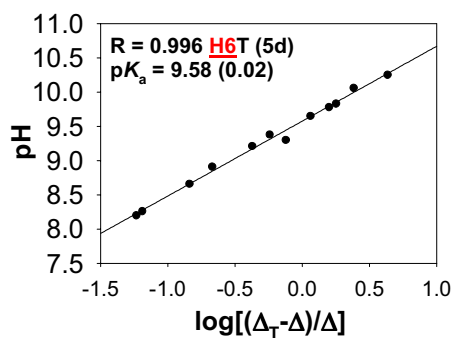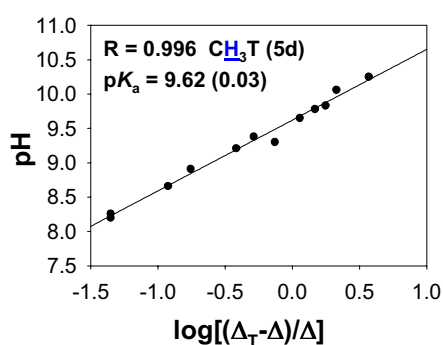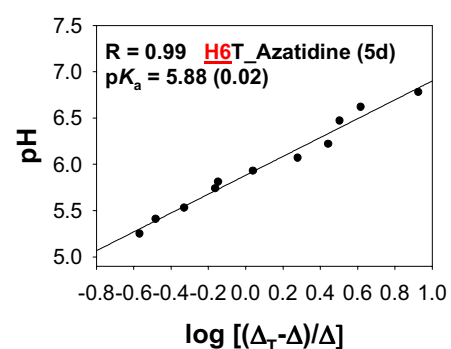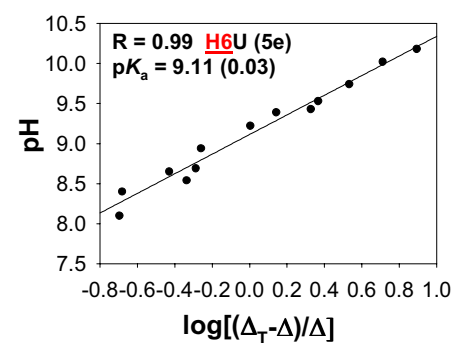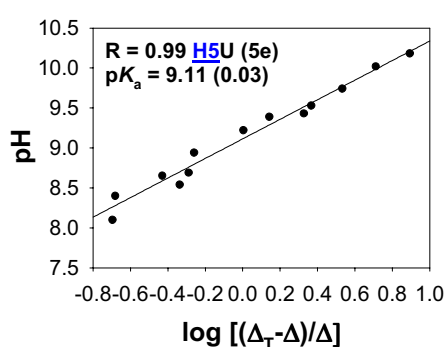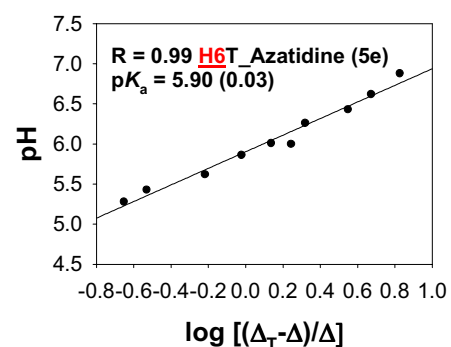

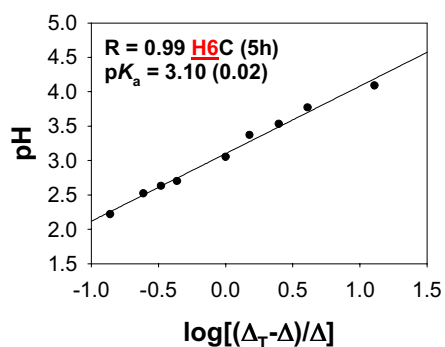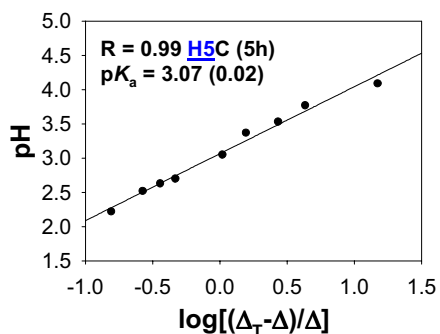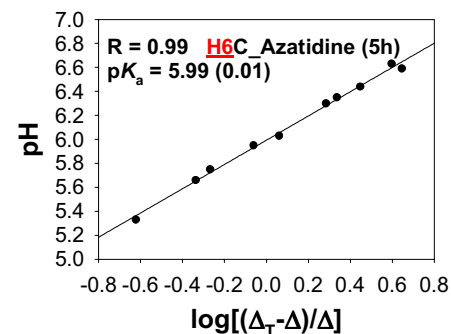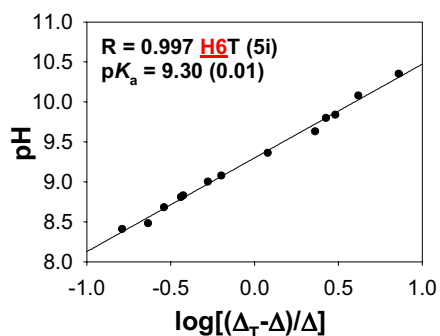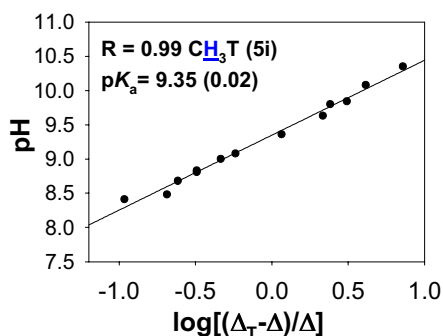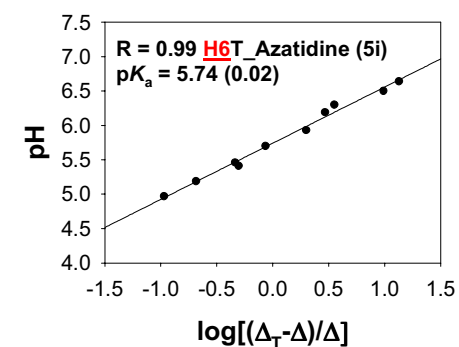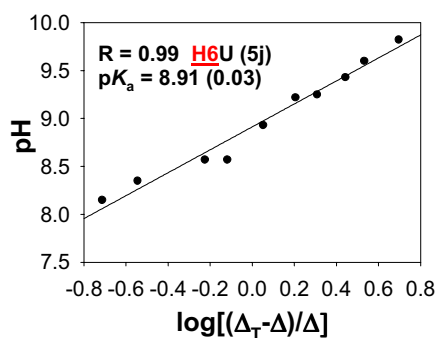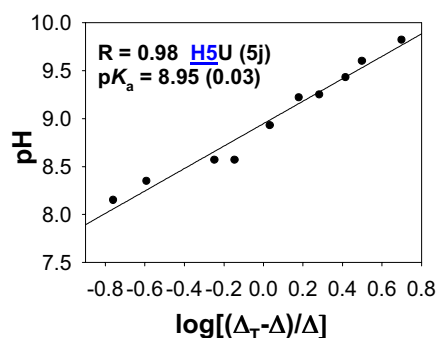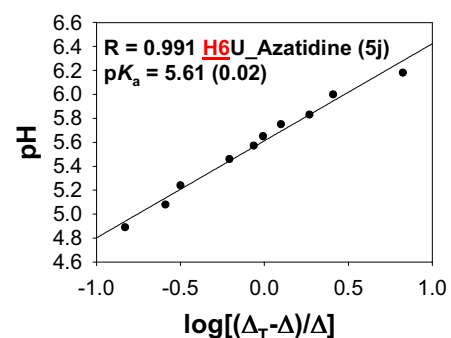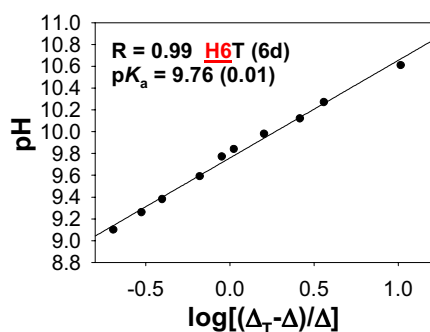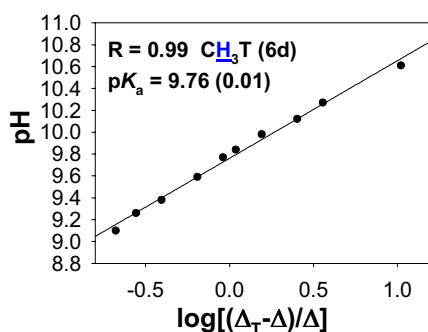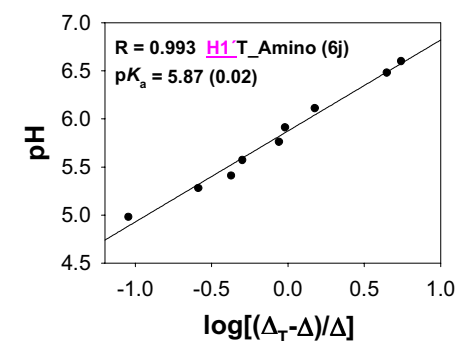

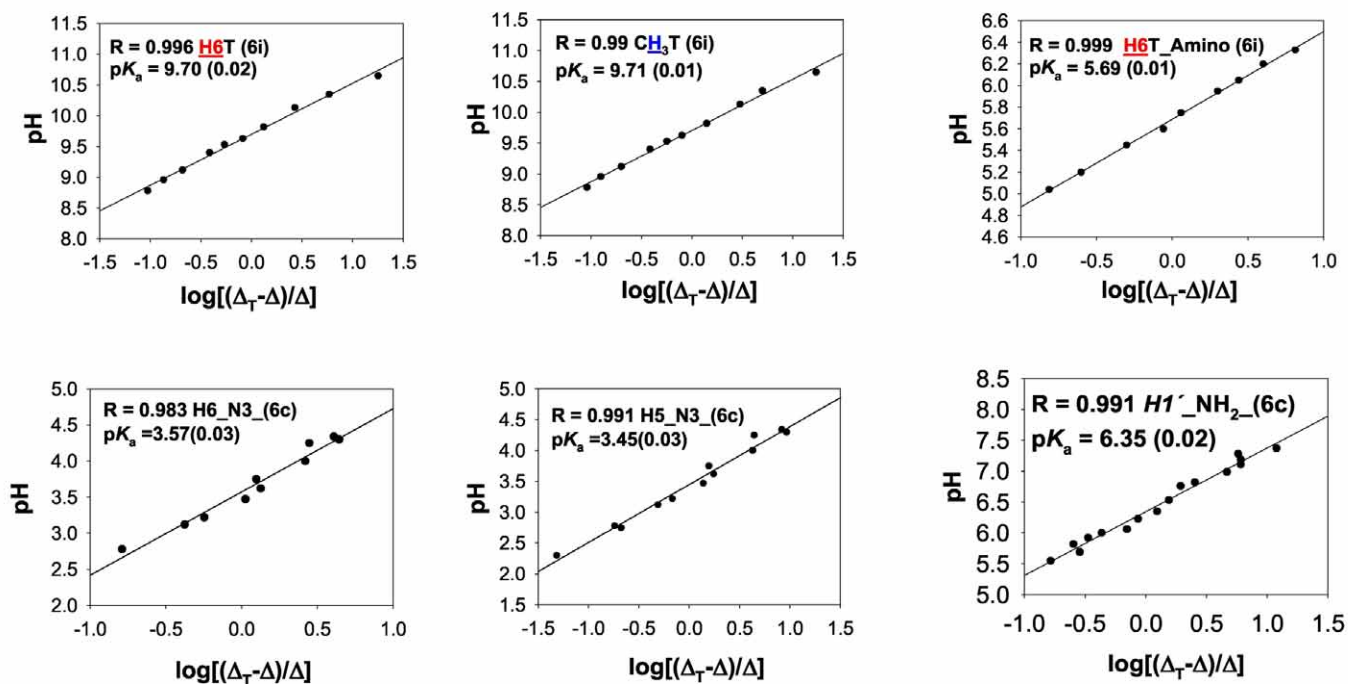

**Figure S4.** Sigmoidal plot of the pH-dependent  $^{31}\text{P}$  chemical shifts of 3' and 5' phosphorus of the 3'5'bis-ethyl and 3' mono ethyl phosphates i.e., 5c-j, 6c-i. to calculate the protonation  $pK_a$  of N-azetidine as well as N-amine.

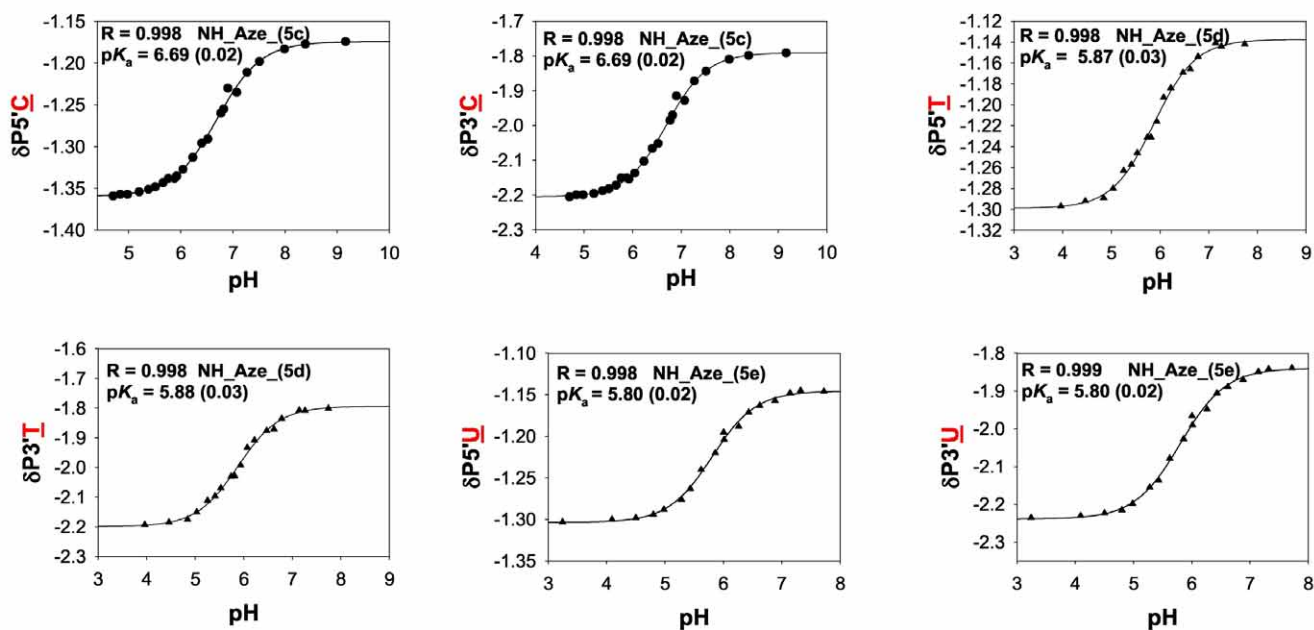

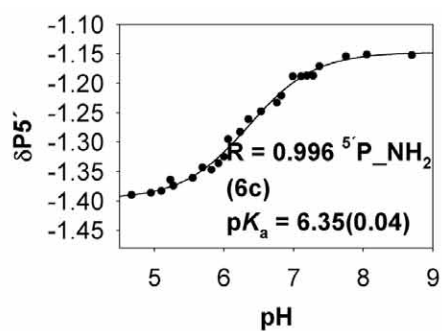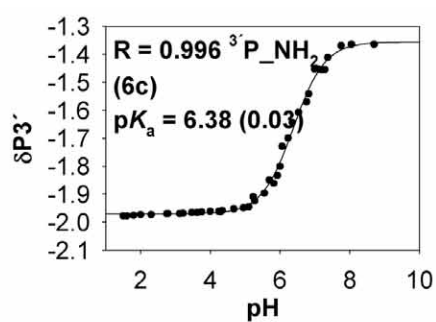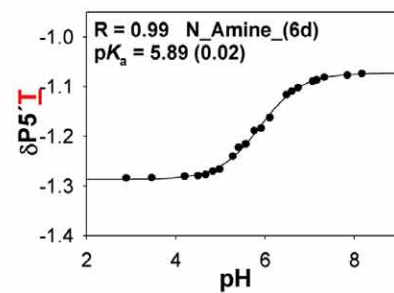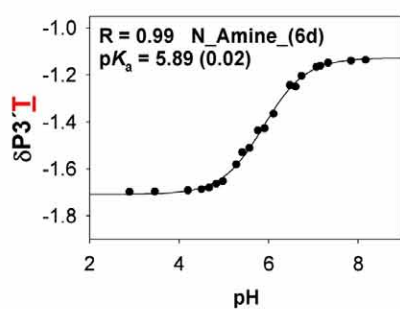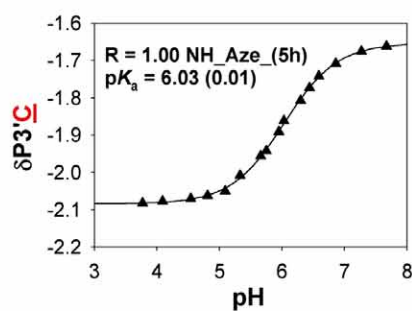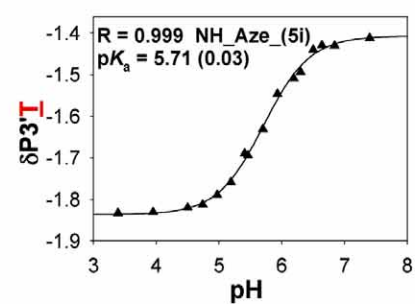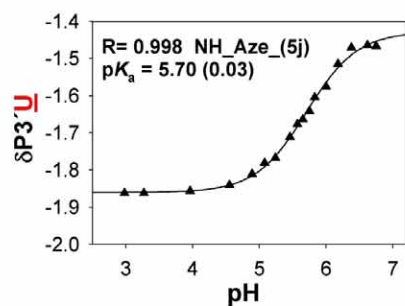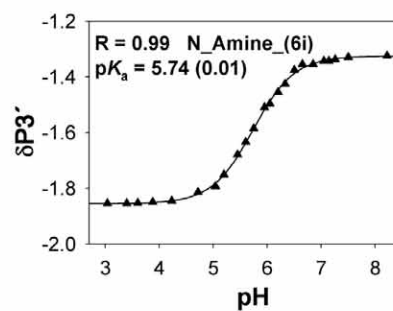

Figure S5. Hill plot analysis of sigmoidal curves in Figure S4.

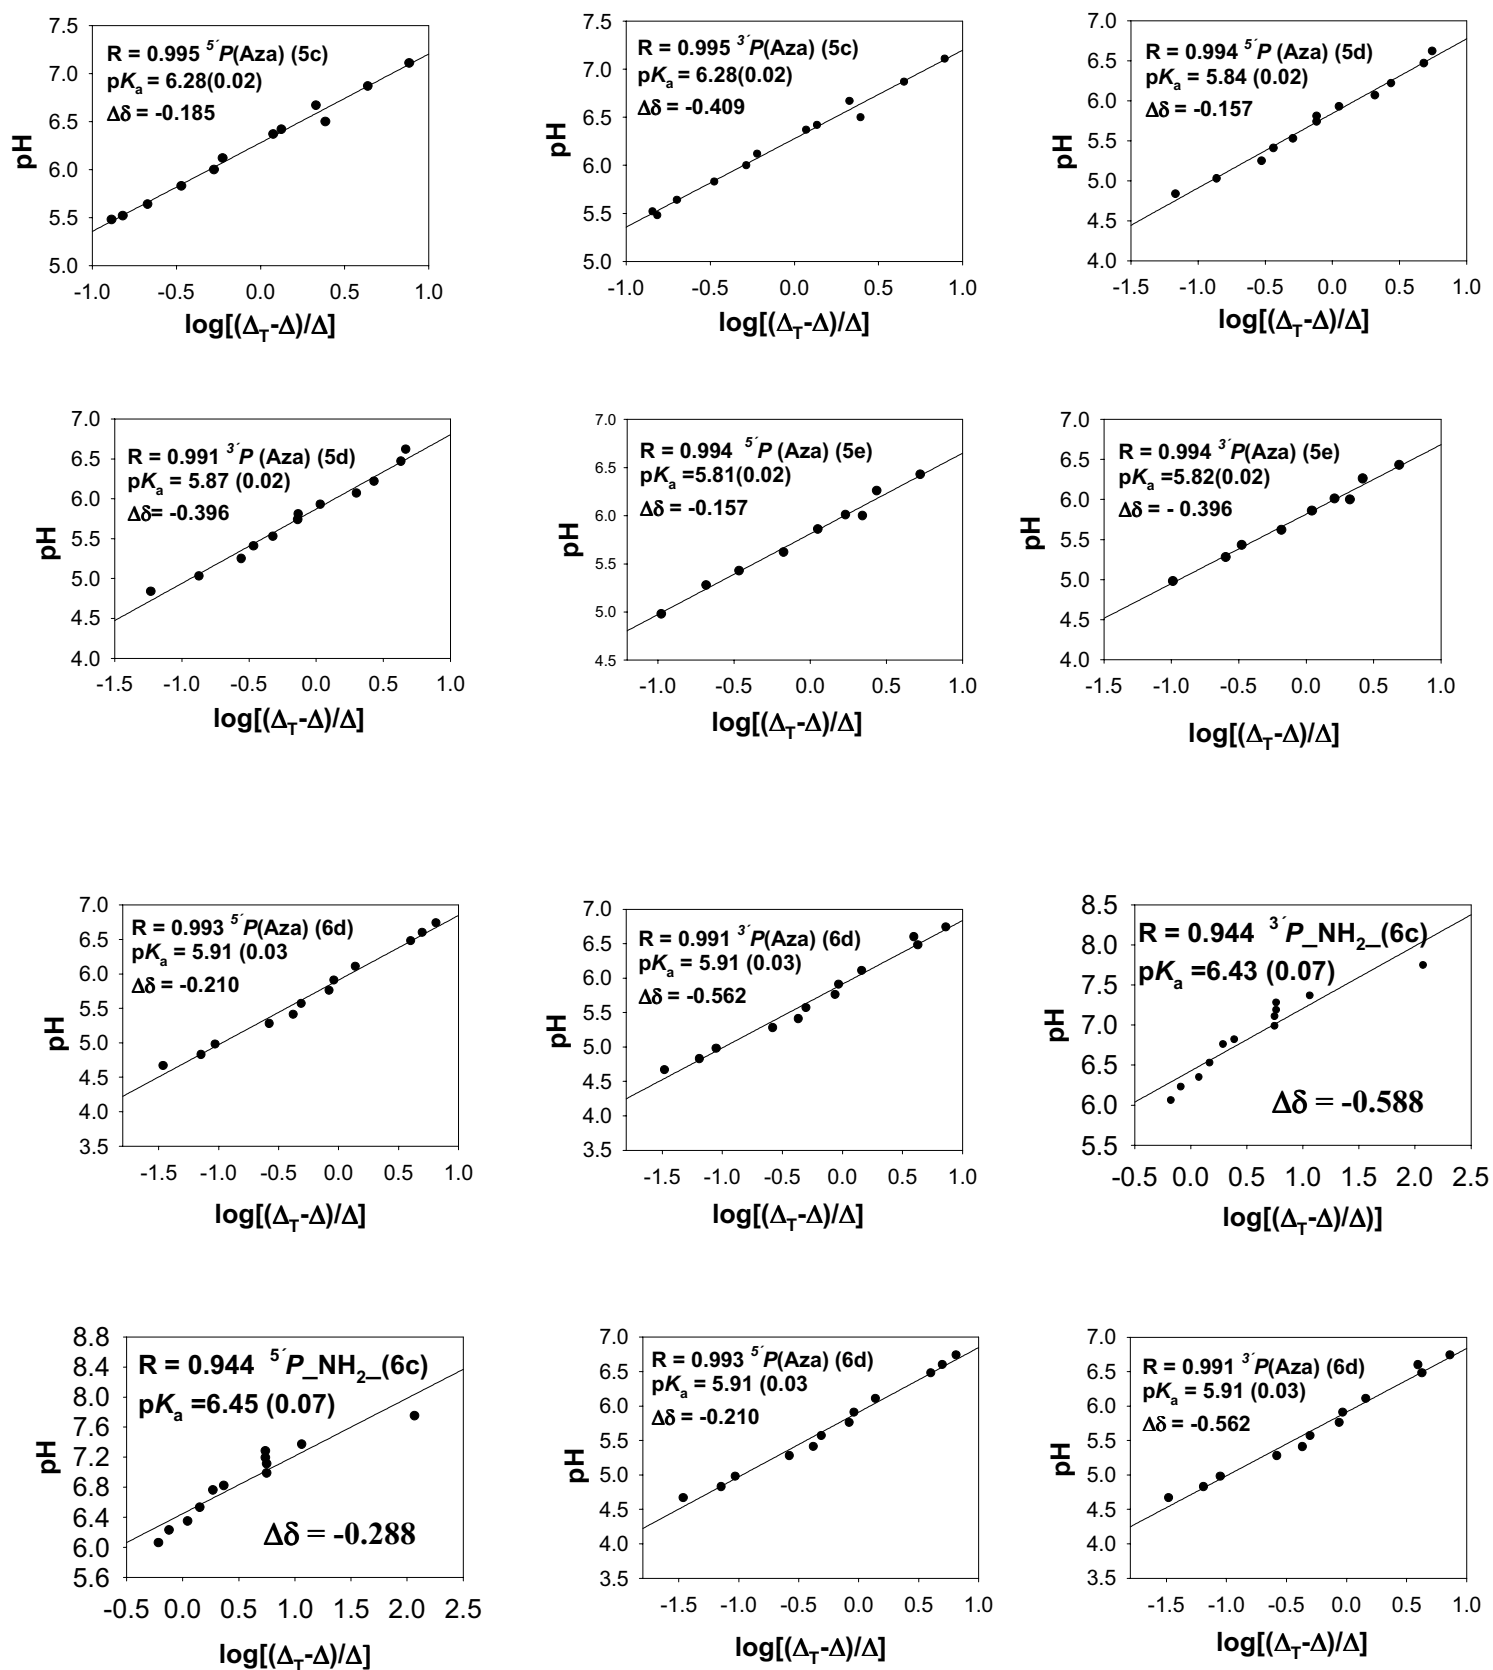

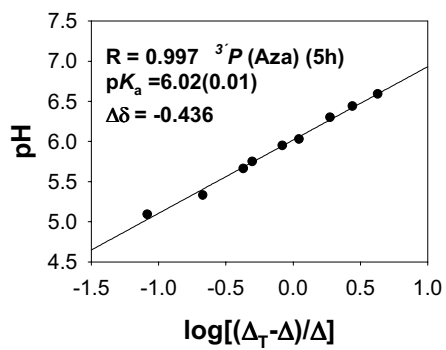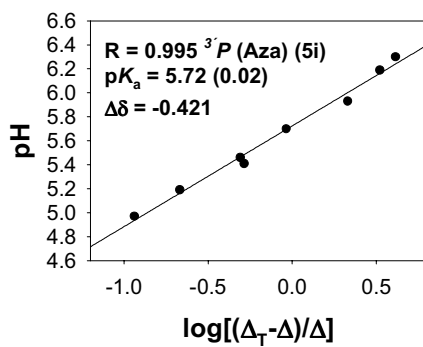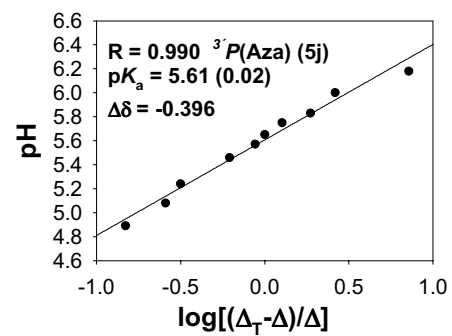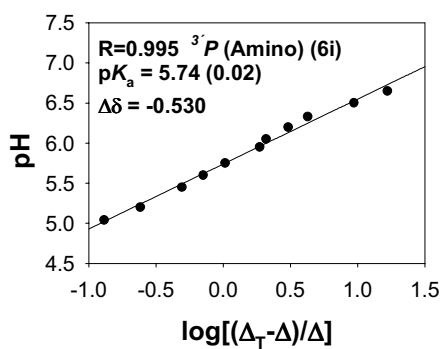

**Table S1.** Theoretical proton affinities (PA), thermodynamic circle's components enthalpies Gibbs free energies (gas phase and solvation), and the theoretical  $pK_a$  values of the nucleobases, 2'-ribo-, 2'-deoxy-, 2'-amino-, 2'-methoxy-, oxetane and azetidene nucleosides as well as the experimental  $pK_a$  values for the corresponding bis-ethylphosphate nucleotides.

| Nucleobase/ nucleoside/<br>nucleotide | dH,<br>BH (gas),<br>a.u. | $\Delta G$ ,<br>BH<br>(gas),<br>a.u. | $\Delta G_s$ ,<br>BH<br>(aq),<br>kcal/m<br>ol. | dH,<br>B (gas),<br>a.u. | $\Delta G$ ,<br>B (gas),<br>a.u. | $\Delta G_s$ ,<br>B<br>(aq),<br>kcal/mol | PA<br>(gas)<br>kcal/<br>mol | $\Delta\Delta G_{gas+}$<br>$\Delta\Delta G_s$<br>kcal/<br>mol | $\Delta\Delta G_s$<br>kcal/mol | pKa<br>(calc) | pKa<br>(exp) |
|---------------------------------------|--------------------------|--------------------------------------|------------------------------------------------|-------------------------|----------------------------------|------------------------------------------|-----------------------------|---------------------------------------------------------------|--------------------------------|---------------|--------------|
| Adenine N1                            | -464.789510              | -464.829581                          | -69.14                                         | -464.420414             | -464.459749                      | -15.68                                   | 231.61                      | 285.53                                                        | 53.46                          | 12.12         | 3.88         |
| Guanine N1                            | -539.289880              | -539.332412                          | -29.77                                         | -538.728519             | -538.770575                      | -80.02                                   | 352.26                      | 301.54                                                        | -51.02                         | 23.85         | 10.00        |
| Thymine N3                            | -451.404438              | -451.446003                          | -15.47                                         | -450.826522             | -450.868080                      | -73.80                                   | 362.65                      | 304.32                                                        | -58.33                         | 25.89         | 10.47        |
| Cytosine N3                           | -392.906651              | -392.944908                          | -73.62                                         | -392.529170             | -392.566883                      | -24.82                                   | 236.87                      | 286.01                                                        | 48.80                          | 12.47         | 4.56         |
| Uracil N3                             | -412.390199              | -412.427943                          | -19.39                                         | -411.812207             | -411.850009                      | -77.97                                   | 362.70                      | 304.08                                                        | -58.58                         | 25.71         | 10.06        |
| Deoxy-A N1                            | -883.245706              | -883.306857                          | -67.20                                         | -882.866148             | -882.928008                      | -17.28                                   | 238.18                      | 287.65                                                        | 49.92                          | 13.67         | 3.83         |
| Deoxy-G N1                            | -957.735180              | -957.799469                          | -31.95                                         | -957.178066             | -957.241982                      | -79.73                                   | 349.59                      | 302.05                                                        | -47.78                         | 24.22         | 9.59         |
| Deoxy-C N3                            | -811.367637              | -811.426481                          | -67.19                                         | -810.973000             | -811.032912                      | -25.98                                   | 247.64                      | 288.18                                                        | 41.21                          | 14.06         | 4.35         |
| Deoxy-T N3                            | -869.847982              | -869.910817                          | -15.98                                         | -869.275890             | -869.338478                      | -71.51                                   | 358.99                      | 303.62                                                        | -55.53                         | 25.37         | 10.12        |
| Ribo-A N1                             | -958.095392              | -958.158419                          | -72.48                                         | -957.718794             | -957.783107                      | -19.86                                   | 236.32                      | 288.13                                                        | 52.62                          | 14.02         | 3.69         |
| Ribo-G N1                             | -1032.587474             | -1032.653389                         | -34.66                                         | -1032.029893            | -1032.095091                     | -83.07                                   | 349.89                      | 301.93                                                        | -48.41                         | 24.13         | 9.27         |
| Ribo-C N3                             | -886.219071              | -886.279279                          | -70.55                                         | -885.831939             | -885.893140                      | -21.86                                   | 242.93                      | 291.00                                                        | 48.69                          | 16.12         | 4.24         |
| Ribo-U N3                             | -905.688515              | -905.748859                          | -18.92                                         | -905.130677             | -905.190191                      | -64.95                                   | 350.05                      | 304.54                                                        | -46.03                         | 26.05         | 9.26         |
| Oxe- <u>A</u> N1                      | -995.918488              | -995.982344                          | -68.21                                         | -995.547148             | -995.611323                      | -15.90                                   | 233.02                      | 285.13                                                        | 52.31                          | 11.82         | 3.68         |
| Oxe- <u>G</u> N1                      | -1070.416758             | -1070.482548                         | -30.34                                         | -1069.867982            | -1069.932855                     | -73.05                                   | 344.36                      | 302.23                                                        | -42.71                         | 24.35         | 9.74         |
| Oxe- <u>C</u> N3                      | -924.034273              | -924.095727                          | -70.46                                         | -923.654259             | -923.715889                      | -25.48                                   | 238.46                      | 283.33                                                        | 44.98                          | 10.50         | 3.54         |
| Oxe- <u>T</u> N3                      | -982.528975              | -982.593174                          | -15.38                                         | -981.967389             | -982.030678                      | -65.63                                   | 352.40                      | 302.72                                                        | -50.25                         | 24.72         | 9.51         |
| 3-Etp-Oxe- <u>T</u> N3                | -1551.646976             | -1551.729075                         | -21.17                                         | -1551.085009            | -1551.166023                     | -72.69                                   | 352.64                      | 301.80                                                        | -51.52                         | 24.04         | -            |
| 5-Etp-Oxe- <u>T</u> N3                | -1626.520543             | -1626.605358                         | -18.15                                         | -1625.959836            | -1626.043581                     | -69.16                                   | 351.85                      | 301.51                                                        | -51.01                         | 23.83         | 9.36         |
| Oxe- <u>U</u> N3                      | -943.514404              | -943.574828                          | -19.90                                         | -942.952908             | -943.012507                      | -70.08                                   | 352.34                      | 302.68                                                        | -50.18                         | 24.69         | 8.93         |



Table S1 (continue).

| nucleoside               | dH,<br>BH (gas),<br>a.u. | $\Delta G$ ,<br>BH<br>(gas),<br>a.u. | $\Delta G_s$ ,<br>BH<br>(aq),<br>kcal/m<br>ol. | dH,<br>B (gas),<br>a.u. | $\Delta G$ ,<br>B (gas),<br>a.u. | $\Delta G_s$ ,<br>B<br>(aq),<br>kcal/mol | PA<br>(gas)<br>kcal/<br>mol | $\Delta\Delta G_{gas+}$<br>$\Delta\Delta G_s$<br>kcal/<br>mol | $\Delta\Delta G_s$<br>kcal/mol | pKa<br>(calc) | pKa<br>(exp) |
|--------------------------|--------------------------|--------------------------------------|------------------------------------------------|-------------------------|----------------------------------|------------------------------------------|-----------------------------|---------------------------------------------------------------|--------------------------------|---------------|--------------|
| Aze-A N1                 | -976.070333              | -976.135228                          | -75.15                                         | -975.699122             | -975.764621                      | -22.17                                   | 232.94                      | 285.54                                                        | 52.98                          | 12.12         | -            |
| Naze                     | -976.094284              | -976.156380                          | -62.33                                         | -975.699122             | -975.764621                      | -22.17                                   | 247.97                      | 285.99                                                        | 40.16                          | 12.45         | -            |
| Aze-G N1                 | <b>-1050.574037</b>      | <b>-1050.640265</b>                  | <b>-33.59</b>                                  | <b>-1050.019017</b>     | <b>-1050.084485</b>              | <b>-81.10</b>                            | 348.28                      | 301.25                                                        | -47.51                         | 23.63         | -            |
| Naze                     | -1050.943030             | -1051.011125                         | -90.87                                         | <b>-1050.574037</b>     | <b>-1050.640265</b>              | <b>-33.59</b>                            | 231.55                      | 290.00                                                        | 57.28                          | 15.39         | -            |
| Aze-C N3                 | -904.199795              | -904.261293                          | -62.36                                         | -903.814699             | -903.876459                      | -26.94                                   | 241.65                      | 276.91                                                        | 35.42                          | 5.80          | 3.24         |
| Naze                     | -904.185948              | -904.248465                          | -80.68                                         | -903.814699             | -903.876459                      | -26.94                                   | 232.96                      | 287.18                                                        | 53.74                          | 13.32         | 6.08         |
| Aze-Me-C N3              | -943.208385              | -943.274726                          | -65.20                                         | -942.820181             | -942.886762                      | -25.35                                   | 243.60                      | 283.30                                                        | 39.85                          | 10.48         | -            |
| Naze                     | -943.198987              | -943.263703                          | -74.64                                         | -942.820181             | -942.886762                      | -25.35                                   | 237.70                      | 285.82                                                        | 49.29                          | 12.33         | -            |
| Aze-I N3                 | <b>-962.690147</b>       | <b>-962.754509</b>                   | <b>-16.82</b>                                  | <b>-962.124209</b>      | <b>-962.187689</b>               | <b>-69.14</b>                            | 355.13                      | 303.37                                                        | -52.32                         | 25.19         | 9.60         |
| Naze                     | -963.052553              | -963.118856                          | -76.23                                         | <b>-962.690147</b>      | <b>-962.754509</b>               | <b>-16.82</b>                            | 227.41                      | 288.04                                                        | 59.41                          | 13.96         | 5.88         |
| 3-Etp-Aze (H down) -I N3 | <b>-1531.808617</b>      | <b>-1531.889260</b>                  | <b>-17.02</b>                                  | <b>-1531.233404</b>     | <b>-1531.315301</b>              | <b>-81.17</b>                            | 360.95                      | 296.02                                                        | -64.15                         | 19.80         | -            |
| Naze                     | -1532.178989             | -1532.260287                         | -71.63                                         | <b>-1531.808617</b>     | <b>-1531.889260</b>              | <b>-17.02</b>                            | 232.41                      | 287.43                                                        | 54.61                          | 13.51         | -            |
| 3-Etp-Aze (H up) -I N3   | <b>-1531.810806</b>      | <b>-1531.891363</b>                  | <b>-16.04</b>                                  | <b>-1531.241960</b>     | <b>-1531.323162</b>              | <b>-76.10</b>                            | 356.96                      | 296.49                                                        | -60.06                         | 20.15         | -            |
| Naze                     | -1532.178991             | -1532.260284                         | -71.66                                         | <b>-1531.810806</b>     | <b>-1531.891363</b>              | <b>-16.04</b>                            | 231.04                      | 287.12                                                        | 55.62                          | 13.28         | -            |
| 5-Etp-Aze (H down) -I N3 | <b>-1606.677256</b>      | <b>-1606.762644</b>                  | <b>-20.84</b>                                  | <b>-1606.110853</b>     | <b>-1606.195675</b>              | <b>-74.69</b>                            | 355.42                      | 301.93                                                        | -53.85                         | 24.13         | 9.34         |
| Naze                     | -1607.054795             | -1607.140208                         | -69.15                                         | <b>-1606.677256</b>     | <b>-1606.762644</b>              | <b>-20.84</b>                            | 236.91                      | 285.24                                                        | 48.31                          | 11.90         | 5.71         |
| 5-Etp-Aze (H up) -I N3   | <b>-1606.681254</b>      | <b>-1606.766686</b>                  | <b>-19.29</b>                                  | <b>-1606.115150</b>     | <b>-1606.199671</b>              | <b>-72.96</b>                            | 355.24                      | 302.14                                                        | -53.67                         | 24.29         | 9.34         |
| Naze                     | -1607.054795             | -1607.140212                         | -69.17                                         | <b>-1606.681254</b>     | <b>-1606.766686</b>              | <b>-19.29</b>                            | 234.40                      | 284.27                                                        | 49.88                          | 11.19         | 5.71         |
| Aze-U N3                 | <b>-923.670689</b>       | <b>-923.731642</b>                   | <b>-23.67</b>                                  | <b>-923.101294</b>      | <b>-923.161586</b>               | <b>-78.83</b>                            | 357.30                      | 302.56                                                        | -55.16                         | 24.59         | 9.11         |
| Naze                     | -924.037934              | -924.099509                          | -79.57                                         | <b>-923.670689</b>      | <b>-923.731642</b>               | <b>-23.67</b>                            | 230.45                      | 286.74                                                        | 55.90                          | 13.00         | 5.90         |
| Me-O-A N1                | -997.084214              | -997.150884                          | -64.18                                         | -996.704971             | -996.773393                      | -13.45                                   | 237.98                      | 287.61                                                        | 50.73                          | 13.64         | 3.77         |
| Me-O-G N1                | <b>-1071.582056</b>      | <b>-1071.652937</b>                  | <b>-26.09</b>                                  | <b>-1071.029785</b>     | <b>-1071.098757</b>              | <b>-69.79</b>                            | 346.56                      | 304.05                                                        | -43.700                        | 25.69         | 9.73         |
| Me-O-C N3                | -925.213389              | -925.278075                          | -62.90                                         | -924.815932             | -924.883015                      | -23.06                                   | 249.41                      | 287.74                                                        | 39.84                          | 13.74         | 4.26         |
| Me-O-T N3                | <b>-983.686985</b>       | <b>-983.755475</b>                   | <b>-12.30</b>                                  | <b>-983.120383</b>      | <b>-983.187677</b>               | <b>-63.28</b>                            | 355.55                      | 305.32                                                        | -50.98                         | 26.62         | 9.94         |

**Table S2:** Frontier orbitals of the 2'-ribo, 2'-deoxy, 2'-amino-, 2'-methoxy-, oxetane- and azetidine-nucleosides.

|                      | HOMO-1                                                                              | HOMO                                                                                | LUMO                                                                                 | LUMO+1                                                                                |
|----------------------|-------------------------------------------------------------------------------------|-------------------------------------------------------------------------------------|--------------------------------------------------------------------------------------|---------------------------------------------------------------------------------------|
| dA ground            | 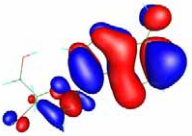   |    |    |    |
| MO energy (a.u.)     | -0.36188 (-0.37104)                                                                 | -0.30677 (-0.31318)                                                                 | 0.13445 (0.12857)                                                                    | 0.16432 (0.15528)                                                                     |
| N1 protonated        |    |    |    |    |
| MO energy (a.u.)     | -0.51492 (-0.40391)                                                                 | -0.46701 (-0.34055)                                                                 | -0.04077 (0.09709)                                                                   | -0.02470 (0.10780)                                                                    |
| rA ground            |    |    |    |    |
| MO energy (a.u.)     | -0.36673 (-0.37117)                                                                 | -0.31054 (-0.31311)                                                                 | 0.13094 (0.12867)                                                                    | 0.15831 (0.15395)                                                                     |
| N1 protonated        |   |   |   |   |
| MO energy (a.u.)     | -0.50948 (-0.40203)                                                                 | -0.47095 (-0.34122)                                                                 | -0.04540 (0.09640)                                                                   | -0.02990 (0.10684)                                                                    |
| Oxe- <u>A</u> ground |  |  |  |  |
| MO energy (a.u.)     | -0.37505 (-0.37779)                                                                 | -0.31733 (-0.31579)                                                                 | 0.12446 (0.12637)                                                                    | 0.15302 (0.15120)                                                                     |
| N1 protonated        |  |  |  |  |
| MO energy (a.u.)     | -0.50492 (-0.40200)                                                                 | -0.47569 (-0.34433)                                                                 | -0.04934 (0.09339)                                                                   | -0.03281 (0.10448)                                                                    |
| A-OMe ground         |  |  |  |  |
| MO energy (a.u.)     | -0.36694 (-0.37360)                                                                 | -0.31100 (-0.31440)                                                                 | 0.13145 (0.12827)                                                                    | 0.16033 (0.15373)                                                                     |
| N1 protonated        |  |  |  |  |
| MO energy (a.u.)     | -0.49051 (-0.39346)                                                                 | -0.46799 (-0.34271)                                                                 | -0.03927 (0.09705)                                                                   | -0.02502 (0.10609)                                                                    |

|                  | <b>HOMO-1</b>                                                                       | <b>HOMO</b>                                                                         | <b>LUMO</b>                                                                          | <b>LUMO+1</b>                                                                         |
|------------------|-------------------------------------------------------------------------------------|-------------------------------------------------------------------------------------|--------------------------------------------------------------------------------------|---------------------------------------------------------------------------------------|
| dG ground        | 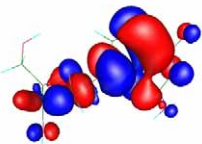   |    |    |    |
| MO energy (a.u.) | -0.38989 (-0.39480)                                                                 | -0.29724 (-0.30490)                                                                 | 0.14929 (0.14697)                                                                    | 0.16615 (0.15953)                                                                     |
| N1 de-protonated |    |    |    |    |
| MO energy (a.u.) | -0.19183 (-0.34728)                                                                 | -0.12450 (-0.27368)                                                                 | 0.28839 (0.17518)                                                                    | 0.30231 (0.19678)                                                                     |
| N7 protonated    |    |    |    |    |
| MO energy (a.u.) | -0.53972 (-0.42191)                                                                 | -0.45327 (-0.33023)                                                                 | -0.02054 (0.10587)                                                                   | 0.01621 (0.14245)                                                                     |
| rG ground        |  |  |  |  |
| MO energy (a.u.) | -0.38620 (-0.39109)                                                                 | -0.29642 (-0.30469)                                                                 | 0.15006 (0.14631)                                                                    | 0.16435 (0.15848)                                                                     |
| N1 de-protonated |  |  |  |  |
| MO energy (a.u.) | -0.19171 (-0.34728)                                                                 | -0.12482 (-0.27369)                                                                 | 0.26965 (0.17091)                                                                    | 0.30011 (0.19732)                                                                     |
| N7 protonated    |  |  |  |  |
| MO energy (a.u.) | -0.54010 (-0.42296)                                                                 | -0.45414 (-0.33030)                                                                 | -0.02050 (0.10633)                                                                   | 0.01371 (0.14110)                                                                     |

|                         |                                                                                     |                                                                                     |                                                                                      |                                                                                       |
|-------------------------|-------------------------------------------------------------------------------------|-------------------------------------------------------------------------------------|--------------------------------------------------------------------------------------|---------------------------------------------------------------------------------------|
| Oxe- <u>G</u><br>ground | 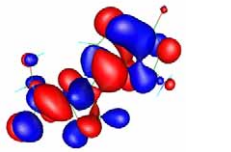   |    |    |    |
| MO energy (a.u.)        | -0.40174 (-0.39934)                                                                 | -0.3072 (-0.30664)                                                                  | 0.13806 (0.14420)                                                                    | 0.15633 (0.15576)                                                                     |
| N1<br>de-protonated     |    |    |    |    |
| MO energy (a.u.)        | -0.20158 (-0.34952)                                                                 | -0.13476 (-0.27515)                                                                 | 0.29150 (0.17088)                                                                    | 0.30292 (0.19203)                                                                     |
| N7 protonated           |    |    |    |    |
| MO energy (a.u.)        | -0.52403 (-0.41502)                                                                 | -0.46227 (-0.33231)                                                                 | -0.02708 (0.10486)                                                                   | 0.00328 (0.13533)                                                                     |
| G-OMe<br>ground         |   |   |   |   |
| MO energy (a.u.)        | -0.38816 (-0.39384)                                                                 | -0.29701 (-0.30589)                                                                 | 0.14981 (0.14591)                                                                    | 0.16502 (0.15738)                                                                     |
| N1<br>de-protonated     |  |  |  |  |
| MO energy (a.u.)        | -0.19864 (-0.34759)                                                                 | -0.13170 (-0.27387)                                                                 | 0.29024 (0.17317)                                                                    | 0.30144 (0.19559)                                                                     |
| N7 protonated           |  |  |  |  |
| MO energy (a.u.)        | -0.52090 (-0.41233)                                                                 | -0.45162 (-0.33068)                                                                 | -0.02151 (0.10418)                                                                   | 0.01663 (0.14007)                                                                     |



|                  | <b>HOMO-1</b>                                                                       | <b>HOMO</b>                                                                         | <b>LUMO</b>                                                                          | <b>LUMO+1</b>                                                                         |
|------------------|-------------------------------------------------------------------------------------|-------------------------------------------------------------------------------------|--------------------------------------------------------------------------------------|---------------------------------------------------------------------------------------|
| dC ground        | 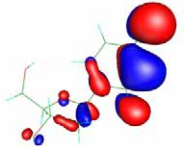   |    |    |    |
| MO energy (a.u.) | -0.37048 (-0.37725)                                                                 | -0.32956 (-0.33362)                                                                 | 0.12346 (0.12421)                                                                    | 0.19234 (0.18366)                                                                     |
| N3 protonated    |    |    |    |    |
| MO energy (a.u.) | -0.49830 (-0.43517)                                                                 | -0.05996 (-0.36364)                                                                 | 0.02430 (0.08135)                                                                    | 0.04809 (0.15654)                                                                     |
| rC ground        |    |    |    |    |
| MO energy (a.u.) | -0.38275 (-0.37966)                                                                 | -0.34550 (-0.33678)                                                                 | 0.11162 (0.12342)                                                                    | 0.17628 (0.17970)                                                                     |
| N3 protonated    |   |   |   |   |
| MO energy (a.u.) | -0.52632 (-0.42058)                                                                 | -0.50246 (-0.36287)                                                                 | -0.06313 (0.08242)                                                                   | 0.01579 (0.15444)                                                                     |
| Oxe-C ground     |  |  |  |  |
| MO energy (a.u.) | -0.38477 (-0.38124)                                                                 | -0.34897 (-0.34529)                                                                 | 0.10518 (0.11624)                                                                    | 0.18029 (0.18002)                                                                     |
| N3 protonated    |  |  |  |  |
| MO energy (a.u.) | -0.52360 (-0.41807)                                                                 | -0.51178 (-0.37358)                                                                 | -0.07376 (0.07475)                                                                   | 0.01318 (0.15226)                                                                     |

|                             |                                                                                     |                                                                                     |                                                                                      |                                                                                       |
|-----------------------------|-------------------------------------------------------------------------------------|-------------------------------------------------------------------------------------|--------------------------------------------------------------------------------------|---------------------------------------------------------------------------------------|
| Aze-C ground                | 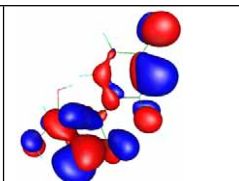   |    |    |    |
| MO energy (a.u.)            | -0.37633 (-0.37336)                                                                 | -0.34314 (-0.34145)                                                                 | 0.10982 (0.11842)                                                                    | 0.18506 (0.18253)                                                                     |
| N3 protonated               |    |    |    |    |
| MO energy (a.u.)            | -0.51142 (-0.38678)                                                                 | -0.49082 (-0.36871)                                                                 | -0.06764 (0.07794)                                                                   | 0.01899 (0.15480)                                                                     |
| N <sub>aze</sub> protonated |    |    |    |    |
| MO energy (a.u.)            | -0.48393 (-0.38646)                                                                 | -0.46122 (-0.35381)                                                                 | -0.00327 (0.10996)                                                                   | 0.01511 (0.17496)                                                                     |
| Amino-C ground              |   |   |   |   |
| MO energy (a.u.)            | -0.36905 (-0.37220)                                                                 | -0.32937 (-0.33561)                                                                 | 0.12243 (0.12213)                                                                    | 0.18858 (0.18539)                                                                     |
| N3 protonated               |  |  |  |  |
| MO energy (a.u.)            | -0.50203 (-0.38182)                                                                 | -0.48148 (-0.36093)                                                                 | -0.05646 (0.08075)                                                                   | 0.03123 (0.15798)                                                                     |
| C-OMe ground                |  |  |  |  |
| MO energy (a.u.)            | -0.37430 (-0.38021)                                                                 | -0.33397 (-0.34002)                                                                 | 0.11740 (0.11890)                                                                    | 0.18970 (0.18326)                                                                     |
| N3 protonated               |  |  |  |  |
| MO energy (a.u.)            | -0.52539 (-0.42067)                                                                 | -0.49665 (-0.36641)                                                                 | -0.06098 (0.07875)                                                                   | 0.02663 (0.15596)                                                                     |

|                             | <b>HOMO-1</b>                                                                       | <b>HOMO</b>                                                                         | <b>LUMO</b>                                                                          | <b>LUMO+1</b>                                                                         |
|-----------------------------|-------------------------------------------------------------------------------------|-------------------------------------------------------------------------------------|--------------------------------------------------------------------------------------|---------------------------------------------------------------------------------------|
| dT ground                   | 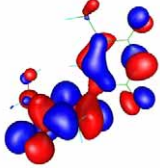   |    |    |    |
| MO energy (a.u.)            | -0.42556 (-0.42012)                                                                 | -0.34313 (-0.34003)                                                                 | 0.11524 (0.11881)                                                                    | 0.18814 (0.18585)                                                                     |
| N3 de-protonated            |    |    |    |    |
| MO energy (a.u.)            | -0.17866 (-0.35020)                                                                 | -0.17533 (-0.30774)                                                                 | 0.28690 (0.15558)                                                                    | 0.29572 (0.21448)                                                                     |
| Oxe- <u>T</u> ground        |    |    |    |    |
| MO energy (a.u.)            | -0.42095 (-0.40921)                                                                 | -0.35882 (-0.34845)                                                                 | 0.10438 (0.11562)                                                                    | 0.17515 (0.18015)                                                                     |
| N3 de-protonated            |   |   |   |   |
| MO energy (a.u.)            | -0.19077 (-0.35266)                                                                 | -0.18852 (-0.31482)                                                                 | 0.27845 (0.15281)                                                                    | 0.31035 (0.21049)                                                                     |
| Aze- <u>T</u> ground        |  |  |  |  |
| MO energy (a.u.)            | -0.39742 (-0.38009)                                                                 | -0.35304 (-0.34471)                                                                 | 0.10881 (0.11753)                                                                    | 0.18036 (0.18296)                                                                     |
| N3 de-protonated            |  |  |  |  |
| MO energy (a.u.)            | -0.18614 (-0.34910)                                                                 | -0.18375 (-0.31130)                                                                 | 0.28199 (0.15505)                                                                    | 0.30260 (0.21296)                                                                     |
| N <sub>aze</sub> protonated |  |  |  |  |
| MO energy (a.u.)            | -0.53817 (-0.43656)                                                                 | -0.46713 (-0.35646)                                                                 | 0.00150 (0.11145)                                                                    | 0.00542 (0.17202)                                                                     |

|                     |                                                                                    |                                                                                    |                                                                                     |                                                                                      |
|---------------------|------------------------------------------------------------------------------------|------------------------------------------------------------------------------------|-------------------------------------------------------------------------------------|--------------------------------------------------------------------------------------|
| Amino-T<br>ground   | 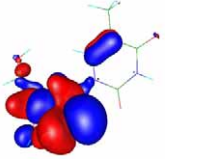  |   |   |   |
| MO energy (a.u.)    | -0.39362 (-0.37584)                                                                | -0.33942 (-0.33943)                                                                | 0.12066 (0.12040)                                                                   | 0.18590 (0.18644)                                                                    |
| N3<br>de-protonated |   |   |   |   |
| MO energy (a.u.)    | -0.19053 (-0.35210)                                                                | -0.17870 (-0.30523)                                                                | 0.28242 (0.15760)                                                                   | 0.30298 (0.20933)                                                                    |
| T-OMe<br>ground     |   |   |   |   |
| MO energy (a.u.)    | -0.41162 (-0.40227)                                                                | -0.34798 (-0.34310)                                                                | 0.11269 (0.11782)                                                                   | 0.18225 (0.18293)                                                                    |
| N3<br>de-protonated |  |  |  |  |
| MO energy (a.u.)    | -0.18638 (-0.35083)                                                                | -0.18218 (-0.30998)                                                                | 0.28435 (0.15507)                                                                   | 0.30334 (0.21168)                                                                    |



|                                | <b>HOMO-1</b>                                                                       | <b>HOMO</b>                                                                         | <b>LUMO</b>                                                                          | <b>LUMO+1</b>                                                                         |
|--------------------------------|-------------------------------------------------------------------------------------|-------------------------------------------------------------------------------------|--------------------------------------------------------------------------------------|---------------------------------------------------------------------------------------|
| rU<br>ground                   | 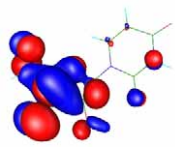   |    |    |    |
| MO energy (a.u.)               | -0.42612 (-0.41494)                                                                 | -0.36243 (-0.34880)                                                                 | 0.10560 (0.11912)                                                                    | 0.16963 (0.18040)                                                                     |
| N3<br>de-protonated            |    |    |    |    |
| MO energy (a.u.)               | -0.19997 (-0.35654)                                                                 | -0.18637 (-0.31726)                                                                 | 0.28485 (0.15633)                                                                    | 0.30898 (0.20640)                                                                     |
| Oxe- <u>U</u><br>ground        |    |    |    |    |
| MO energy (a.u.)               | -0.42338 (-0.40989)                                                                 | -0.37221 (-0.35969)                                                                 | 0.09897 (0.11252)                                                                    | 0.17251 (0.17894)                                                                     |
| N3<br>de-protonated            |   |   |   |   |
| MO energy (a.u.)               | -0.19750 (-0.35417)                                                                 | -0.18807 (-0.32616)                                                                 | 0.27610 (0.14895)                                                                    | 0.30926 (0.20837)                                                                     |
| Aze- <u>U</u><br>ground        |  |  |  |  |
| MO energy (a.u.)               | -0.38314 (-0.37304)                                                                 | -0.36304 (-0.35562)                                                                 | 0.10712 (0.11568)                                                                    | 0.18036 (0.18137)                                                                     |
| N3 de-protonated               |  |  |  |  |
| MO energy (a.u.)               | -0.18907 (-0.35138)                                                                 | -0.17969 (-0.32219)                                                                 | 0.28298 (0.15212)                                                                    | 0.28697 (0.21094)                                                                     |
| N <sub>aze</sub><br>protonated |  |  |  |  |
| MO energy (a.u.)               | -0.53454 (-0.43944)                                                                 | -0.47463 (-0.36651)                                                                 | 0.00124 (0.10949)                                                                    | 0.00511 (0.17178)                                                                     |

**Table S3.** Calculated acid-base dipole moments differences ( $\Delta$ dipole moments) of the nucleobases, 2'-deoxy-, 2'-ribo-, 2'-OMe, oxetane-, and azetidine- nucleosides as well as the experimental  $pK_a$  values of the respective bis-ethylphosphate nucleotides.

| Nucleobase/<br>nucleoside | $\Delta$ dipole moment<br>(gas phase) | $\Delta$ dipole moment<br>(in H <sub>2</sub> O) | $pK_a$<br>(exp) <sup>†</sup> |
|---------------------------|---------------------------------------|-------------------------------------------------|------------------------------|
| cytosine                  | -1.3377                               | -2.3516                                         | 4.56                         |
| adenine                   | 1.4630                                | 1.9510                                          | 3.88                         |
| guanine                   | -1.3479                               | -2.4596                                         | 10.00                        |
| thymine                   | -4.2695                               | -5.7786                                         | 10.47                        |
| uracil                    | -3.5033                               | -4.8393                                         | 10.06                        |
| deoxy-C                   | 4.9102                                | 5.3112                                          | 4.35 ( <b>3c</b> )           |
| deoxy-A                   | 9.4177                                | 11.8638                                         | 3.83 ( <b>3a</b> )           |
| deoxy-G                   | -9.5262                               | -11.5763                                        | 9.59 ( <b>3b</b> )           |
| deoxy-T                   | -10.6595                              | -13.3928                                        | 10.12 ( <b>3d</b> )          |
| ribo-C                    | 4.6386                                | 5.0668                                          | 4.24 ( <b>1c</b> )           |
| ribo-A                    | 11.4977                               | 14.3498                                         | 3.69 ( <b>1a</b> )           |
| ribo-G                    | -11.0964                              | -13.4892                                        | 9.27 ( <b>1b</b> )           |
| ribo-U                    | -10.1665                              | -12.6251                                        | 9.26 ( <b>1e</b> )           |
| oxetane-C                 | 8.0784                                | 8.8815                                          | 3.54 ( <b>4c</b> )           |
| oxetane-A                 | 12.1316                               | 15.2689                                         | 3.68 ( <b>4a</b> )           |
| oxetane-G                 | -7.1178                               | -9.0084                                         | 9.74 ( <b>4b</b> )           |
| oxetane-T                 | -11.1152                              | -13.8222                                        | 9.51 ( <b>4d</b> )           |
| oxetane-U                 | -11.6434                              | -14.3914                                        | 8.93 ( <b>4e</b> )           |
| 2'-OMe-C                  | 4.6904                                | 4.7199                                          | 4.26 ( <b>2c</b> )           |
| 2'-OMe-A                  | 10.4398                               | 12.4241                                         | 3.77 ( <b>2a</b> )           |
| 2'-OMe-G                  | -8.9266                               | -11.2460                                        | 9.73 ( <b>2b</b> )           |
| 2'-OMe-T                  | -10.2846                              | -12.8102                                        | 9.94 ( <b>2d</b> )           |
| azetidine-C               | 7.2827                                | 7.8803                                          | 3.24 ( <b>5c</b> )           |
| azetidine-T               | -9.9700                               | -12.4144                                        | 9.60 ( <b>5d</b> )           |
| azetidine-U               | -11.4124                              | -14.1284                                        | 9.11 ( <b>5e</b> )           |

<sup>†</sup> Compound numbers (Figure 1) of the 3',5'-bis-ethyl-phosphate nucleotides are shown in parenthesis
